# Supplementary material
Source: HighWire-hosted journal article supplement (https://tobaccocontrol.bmj.com/content/32/3/323)
Supplement: inline-supplementary-material-1 [file inline-supplementary-material-1.pdf]

23/10/2020

FONIS TABACO V2.0 | REDCap

FONIS TABACO V2.0

Inicio del Proyecto

Libro de códigos

Libro de códigos

▼

Libro de códigos del diccionario de datos

23-10-2020 09:03

Collapse all instruments

| #                                                                                                                  | variable/nombre del campo | Etiqueta de Campo<br><i>Nota de campo</i> | Atributos de campo (tipo de campo, validación, opciones, una lógica ramificada, cálculos, etc.)                                                                                                                                                                                                                                                                                                      |   |  |   |  |   |  |   |  |   |  |   |  |   |  |   |  |   |  |    |  |    |  |    |  |
|--------------------------------------------------------------------------------------------------------------------|---------------------------|-------------------------------------------|------------------------------------------------------------------------------------------------------------------------------------------------------------------------------------------------------------------------------------------------------------------------------------------------------------------------------------------------------------------------------------------------------|---|--|---|--|---|--|---|--|---|--|---|--|---|--|---|--|---|--|----|--|----|--|----|--|
| Instrumento: <b>Fonis Tabaco Visualizador</b> (fonis_tabaco_visualizador)  Enabled as survey <div>^ Collapse</div> |                           |                                           |                                                                                                                                                                                                                                                                                                                                                                                                      |   |  |   |  |   |  |   |  |   |  |   |  |   |  |   |  |   |  |    |  |    |  |    |  |
| 1                                                                                                                  | record_id                 | Record ID                                 | text                                                                                                                                                                                                                                                                                                                                                                                                 |   |  |   |  |   |  |   |  |   |  |   |  |   |  |   |  |   |  |    |  |    |  |    |  |
| 2                                                                                                                  | fecha_hora_registro       | Fecha y hora de registro                  | text (datetime_dmy)<br>Field Annotation: @NOW @READONLY @HIDDEN-SURVEY                                                                                                                                                                                                                                                                                                                               |   |  |   |  |   |  |   |  |   |  |   |  |   |  |   |  |   |  |    |  |    |  |    |  |
| 3                                                                                                                  | cod                       | 1.- Nombre del observador:                | dropdown (autocomplete), Required <table><tr><td>1</td><td></td></tr><tr><td>2</td><td></td></tr><tr><td>3</td><td></td></tr><tr><td>4</td><td></td></tr><tr><td>5</td><td></td></tr><tr><td>6</td><td></td></tr><tr><td>7</td><td></td></tr><tr><td>8</td><td></td></tr><tr><td>9</td><td></td></tr><tr><td>10</td><td></td></tr><tr><td>11</td><td></td></tr><tr><td>12</td><td></td></tr></table> | 1 |  | 2 |  | 3 |  | 4 |  | 5 |  | 6 |  | 7 |  | 8 |  | 9 |  | 10 |  | 11 |  | 12 |  |
| 1                                                                                                                  |                           |                                           |                                                                                                                                                                                                                                                                                                                                                                                                      |   |  |   |  |   |  |   |  |   |  |   |  |   |  |   |  |   |  |    |  |    |  |    |  |
| 2                                                                                                                  |                           |                                           |                                                                                                                                                                                                                                                                                                                                                                                                      |   |  |   |  |   |  |   |  |   |  |   |  |   |  |   |  |   |  |    |  |    |  |    |  |
| 3                                                                                                                  |                           |                                           |                                                                                                                                                                                                                                                                                                                                                                                                      |   |  |   |  |   |  |   |  |   |  |   |  |   |  |   |  |   |  |    |  |    |  |    |  |
| 4                                                                                                                  |                           |                                           |                                                                                                                                                                                                                                                                                                                                                                                                      |   |  |   |  |   |  |   |  |   |  |   |  |   |  |   |  |   |  |    |  |    |  |    |  |
| 5                                                                                                                  |                           |                                           |                                                                                                                                                                                                                                                                                                                                                                                                      |   |  |   |  |   |  |   |  |   |  |   |  |   |  |   |  |   |  |    |  |    |  |    |  |
| 6                                                                                                                  |                           |                                           |                                                                                                                                                                                                                                                                                                                                                                                                      |   |  |   |  |   |  |   |  |   |  |   |  |   |  |   |  |   |  |    |  |    |  |    |  |
| 7                                                                                                                  |                           |                                           |                                                                                                                                                                                                                                                                                                                                                                                                      |   |  |   |  |   |  |   |  |   |  |   |  |   |  |   |  |   |  |    |  |    |  |    |  |
| 8                                                                                                                  |                           |                                           |                                                                                                                                                                                                                                                                                                                                                                                                      |   |  |   |  |   |  |   |  |   |  |   |  |   |  |   |  |   |  |    |  |    |  |    |  |
| 9                                                                                                                  |                           |                                           |                                                                                                                                                                                                                                                                                                                                                                                                      |   |  |   |  |   |  |   |  |   |  |   |  |   |  |   |  |   |  |    |  |    |  |    |  |
| 10                                                                                                                 |                           |                                           |                                                                                                                                                                                                                                                                                                                                                                                                      |   |  |   |  |   |  |   |  |   |  |   |  |   |  |   |  |   |  |    |  |    |  |    |  |
| 11                                                                                                                 |                           |                                           |                                                                                                                                                                                                                                                                                                                                                                                                      |   |  |   |  |   |  |   |  |   |  |   |  |   |  |   |  |   |  |    |  |    |  |    |  |
| 12                                                                                                                 |                           |                                           |                                                                                                                                                                                                                                                                                                                                                                                                      |   |  |   |  |   |  |   |  |   |  |   |  |   |  |   |  |   |  |    |  |    |  |    |  |

23/10/2020

FONIS TABACO V2.0 | REDCap

|    |                                                                                                                              |                                                                                                                                                      |                                                                                                                                                                                                                                                                                                                                                                                                                                                                                                                                                                                                                                                                                                                                                                                                                                                                                                                                                                                                                                        |   |    |   |    |   |   |   |   |   |   |   |   |   |   |   |   |   |   |   |   |    |    |    |    |    |    |    |    |    |    |    |    |    |    |    |    |    |    |    |    |    |    |    |    |    |    |    |    |    |    |    |    |    |    |    |    |    |    |    |    |
|----|------------------------------------------------------------------------------------------------------------------------------|------------------------------------------------------------------------------------------------------------------------------------------------------|----------------------------------------------------------------------------------------------------------------------------------------------------------------------------------------------------------------------------------------------------------------------------------------------------------------------------------------------------------------------------------------------------------------------------------------------------------------------------------------------------------------------------------------------------------------------------------------------------------------------------------------------------------------------------------------------------------------------------------------------------------------------------------------------------------------------------------------------------------------------------------------------------------------------------------------------------------------------------------------------------------------------------------------|---|----|---|----|---|---|---|---|---|---|---|---|---|---|---|---|---|---|---|---|----|----|----|----|----|----|----|----|----|----|----|----|----|----|----|----|----|----|----|----|----|----|----|----|----|----|----|----|----|----|----|----|----|----|----|----|----|----|----|----|
| 4  | minuto                                                                                                                       | <p>2.- Indique el minuto de emisión</p> <p><i>Se considera minuto 0 desde el 00:00 hasta el 00:59</i></p>                                            | <p>dropdown (autocomplete)</p> <table border="1"> <tr><td>0</td><td>0</td></tr> <tr><td>1</td><td>1</td></tr> <tr><td>2</td><td>2</td></tr> <tr><td>3</td><td>3</td></tr> <tr><td>4</td><td>4</td></tr> <tr><td>5</td><td>5</td></tr> <tr><td>6</td><td>6</td></tr> <tr><td>7</td><td>7</td></tr> <tr><td>8</td><td>8</td></tr> <tr><td>9</td><td>9</td></tr> <tr><td>10</td><td>10</td></tr> <tr><td>11</td><td>11</td></tr> <tr><td>12</td><td>12</td></tr> <tr><td>13</td><td>13</td></tr> <tr><td>14</td><td>14</td></tr> <tr><td>15</td><td>15</td></tr> <tr><td>16</td><td>16</td></tr> <tr><td>17</td><td>17</td></tr> <tr><td>18</td><td>18</td></tr> <tr><td>19</td><td>19</td></tr> <tr><td>20</td><td>20</td></tr> <tr><td>21</td><td>21</td></tr> <tr><td>22</td><td>22</td></tr> <tr><td>23</td><td>23</td></tr> <tr><td>24</td><td>24</td></tr> <tr><td>25</td><td>25</td></tr> <tr><td>26</td><td>26</td></tr> <tr><td>27</td><td>27</td></tr> <tr><td>28</td><td>28</td></tr> <tr><td>29</td><td>29</td></tr> </table> | 0 | 0  | 1 | 1  | 2 | 2 | 3 | 3 | 4 | 4 | 5 | 5 | 6 | 6 | 7 | 7 | 8 | 8 | 9 | 9 | 10 | 10 | 11 | 11 | 12 | 12 | 13 | 13 | 14 | 14 | 15 | 15 | 16 | 16 | 17 | 17 | 18 | 18 | 19 | 19 | 20 | 20 | 21 | 21 | 22 | 22 | 23 | 23 | 24 | 24 | 25 | 25 | 26 | 26 | 27 | 27 | 28 | 28 | 29 | 29 |
| 0  | 0                                                                                                                            |                                                                                                                                                      |                                                                                                                                                                                                                                                                                                                                                                                                                                                                                                                                                                                                                                                                                                                                                                                                                                                                                                                                                                                                                                        |   |    |   |    |   |   |   |   |   |   |   |   |   |   |   |   |   |   |   |   |    |    |    |    |    |    |    |    |    |    |    |    |    |    |    |    |    |    |    |    |    |    |    |    |    |    |    |    |    |    |    |    |    |    |    |    |    |    |    |    |
| 1  | 1                                                                                                                            |                                                                                                                                                      |                                                                                                                                                                                                                                                                                                                                                                                                                                                                                                                                                                                                                                                                                                                                                                                                                                                                                                                                                                                                                                        |   |    |   |    |   |   |   |   |   |   |   |   |   |   |   |   |   |   |   |   |    |    |    |    |    |    |    |    |    |    |    |    |    |    |    |    |    |    |    |    |    |    |    |    |    |    |    |    |    |    |    |    |    |    |    |    |    |    |    |    |
| 2  | 2                                                                                                                            |                                                                                                                                                      |                                                                                                                                                                                                                                                                                                                                                                                                                                                                                                                                                                                                                                                                                                                                                                                                                                                                                                                                                                                                                                        |   |    |   |    |   |   |   |   |   |   |   |   |   |   |   |   |   |   |   |   |    |    |    |    |    |    |    |    |    |    |    |    |    |    |    |    |    |    |    |    |    |    |    |    |    |    |    |    |    |    |    |    |    |    |    |    |    |    |    |    |
| 3  | 3                                                                                                                            |                                                                                                                                                      |                                                                                                                                                                                                                                                                                                                                                                                                                                                                                                                                                                                                                                                                                                                                                                                                                                                                                                                                                                                                                                        |   |    |   |    |   |   |   |   |   |   |   |   |   |   |   |   |   |   |   |   |    |    |    |    |    |    |    |    |    |    |    |    |    |    |    |    |    |    |    |    |    |    |    |    |    |    |    |    |    |    |    |    |    |    |    |    |    |    |    |    |
| 4  | 4                                                                                                                            |                                                                                                                                                      |                                                                                                                                                                                                                                                                                                                                                                                                                                                                                                                                                                                                                                                                                                                                                                                                                                                                                                                                                                                                                                        |   |    |   |    |   |   |   |   |   |   |   |   |   |   |   |   |   |   |   |   |    |    |    |    |    |    |    |    |    |    |    |    |    |    |    |    |    |    |    |    |    |    |    |    |    |    |    |    |    |    |    |    |    |    |    |    |    |    |    |    |
| 5  | 5                                                                                                                            |                                                                                                                                                      |                                                                                                                                                                                                                                                                                                                                                                                                                                                                                                                                                                                                                                                                                                                                                                                                                                                                                                                                                                                                                                        |   |    |   |    |   |   |   |   |   |   |   |   |   |   |   |   |   |   |   |   |    |    |    |    |    |    |    |    |    |    |    |    |    |    |    |    |    |    |    |    |    |    |    |    |    |    |    |    |    |    |    |    |    |    |    |    |    |    |    |    |
| 6  | 6                                                                                                                            |                                                                                                                                                      |                                                                                                                                                                                                                                                                                                                                                                                                                                                                                                                                                                                                                                                                                                                                                                                                                                                                                                                                                                                                                                        |   |    |   |    |   |   |   |   |   |   |   |   |   |   |   |   |   |   |   |   |    |    |    |    |    |    |    |    |    |    |    |    |    |    |    |    |    |    |    |    |    |    |    |    |    |    |    |    |    |    |    |    |    |    |    |    |    |    |    |    |
| 7  | 7                                                                                                                            |                                                                                                                                                      |                                                                                                                                                                                                                                                                                                                                                                                                                                                                                                                                                                                                                                                                                                                                                                                                                                                                                                                                                                                                                                        |   |    |   |    |   |   |   |   |   |   |   |   |   |   |   |   |   |   |   |   |    |    |    |    |    |    |    |    |    |    |    |    |    |    |    |    |    |    |    |    |    |    |    |    |    |    |    |    |    |    |    |    |    |    |    |    |    |    |    |    |
| 8  | 8                                                                                                                            |                                                                                                                                                      |                                                                                                                                                                                                                                                                                                                                                                                                                                                                                                                                                                                                                                                                                                                                                                                                                                                                                                                                                                                                                                        |   |    |   |    |   |   |   |   |   |   |   |   |   |   |   |   |   |   |   |   |    |    |    |    |    |    |    |    |    |    |    |    |    |    |    |    |    |    |    |    |    |    |    |    |    |    |    |    |    |    |    |    |    |    |    |    |    |    |    |    |
| 9  | 9                                                                                                                            |                                                                                                                                                      |                                                                                                                                                                                                                                                                                                                                                                                                                                                                                                                                                                                                                                                                                                                                                                                                                                                                                                                                                                                                                                        |   |    |   |    |   |   |   |   |   |   |   |   |   |   |   |   |   |   |   |   |    |    |    |    |    |    |    |    |    |    |    |    |    |    |    |    |    |    |    |    |    |    |    |    |    |    |    |    |    |    |    |    |    |    |    |    |    |    |    |    |
| 10 | 10                                                                                                                           |                                                                                                                                                      |                                                                                                                                                                                                                                                                                                                                                                                                                                                                                                                                                                                                                                                                                                                                                                                                                                                                                                                                                                                                                                        |   |    |   |    |   |   |   |   |   |   |   |   |   |   |   |   |   |   |   |   |    |    |    |    |    |    |    |    |    |    |    |    |    |    |    |    |    |    |    |    |    |    |    |    |    |    |    |    |    |    |    |    |    |    |    |    |    |    |    |    |
| 11 | 11                                                                                                                           |                                                                                                                                                      |                                                                                                                                                                                                                                                                                                                                                                                                                                                                                                                                                                                                                                                                                                                                                                                                                                                                                                                                                                                                                                        |   |    |   |    |   |   |   |   |   |   |   |   |   |   |   |   |   |   |   |   |    |    |    |    |    |    |    |    |    |    |    |    |    |    |    |    |    |    |    |    |    |    |    |    |    |    |    |    |    |    |    |    |    |    |    |    |    |    |    |    |
| 12 | 12                                                                                                                           |                                                                                                                                                      |                                                                                                                                                                                                                                                                                                                                                                                                                                                                                                                                                                                                                                                                                                                                                                                                                                                                                                                                                                                                                                        |   |    |   |    |   |   |   |   |   |   |   |   |   |   |   |   |   |   |   |   |    |    |    |    |    |    |    |    |    |    |    |    |    |    |    |    |    |    |    |    |    |    |    |    |    |    |    |    |    |    |    |    |    |    |    |    |    |    |    |    |
| 13 | 13                                                                                                                           |                                                                                                                                                      |                                                                                                                                                                                                                                                                                                                                                                                                                                                                                                                                                                                                                                                                                                                                                                                                                                                                                                                                                                                                                                        |   |    |   |    |   |   |   |   |   |   |   |   |   |   |   |   |   |   |   |   |    |    |    |    |    |    |    |    |    |    |    |    |    |    |    |    |    |    |    |    |    |    |    |    |    |    |    |    |    |    |    |    |    |    |    |    |    |    |    |    |
| 14 | 14                                                                                                                           |                                                                                                                                                      |                                                                                                                                                                                                                                                                                                                                                                                                                                                                                                                                                                                                                                                                                                                                                                                                                                                                                                                                                                                                                                        |   |    |   |    |   |   |   |   |   |   |   |   |   |   |   |   |   |   |   |   |    |    |    |    |    |    |    |    |    |    |    |    |    |    |    |    |    |    |    |    |    |    |    |    |    |    |    |    |    |    |    |    |    |    |    |    |    |    |    |    |
| 15 | 15                                                                                                                           |                                                                                                                                                      |                                                                                                                                                                                                                                                                                                                                                                                                                                                                                                                                                                                                                                                                                                                                                                                                                                                                                                                                                                                                                                        |   |    |   |    |   |   |   |   |   |   |   |   |   |   |   |   |   |   |   |   |    |    |    |    |    |    |    |    |    |    |    |    |    |    |    |    |    |    |    |    |    |    |    |    |    |    |    |    |    |    |    |    |    |    |    |    |    |    |    |    |
| 16 | 16                                                                                                                           |                                                                                                                                                      |                                                                                                                                                                                                                                                                                                                                                                                                                                                                                                                                                                                                                                                                                                                                                                                                                                                                                                                                                                                                                                        |   |    |   |    |   |   |   |   |   |   |   |   |   |   |   |   |   |   |   |   |    |    |    |    |    |    |    |    |    |    |    |    |    |    |    |    |    |    |    |    |    |    |    |    |    |    |    |    |    |    |    |    |    |    |    |    |    |    |    |    |
| 17 | 17                                                                                                                           |                                                                                                                                                      |                                                                                                                                                                                                                                                                                                                                                                                                                                                                                                                                                                                                                                                                                                                                                                                                                                                                                                                                                                                                                                        |   |    |   |    |   |   |   |   |   |   |   |   |   |   |   |   |   |   |   |   |    |    |    |    |    |    |    |    |    |    |    |    |    |    |    |    |    |    |    |    |    |    |    |    |    |    |    |    |    |    |    |    |    |    |    |    |    |    |    |    |
| 18 | 18                                                                                                                           |                                                                                                                                                      |                                                                                                                                                                                                                                                                                                                                                                                                                                                                                                                                                                                                                                                                                                                                                                                                                                                                                                                                                                                                                                        |   |    |   |    |   |   |   |   |   |   |   |   |   |   |   |   |   |   |   |   |    |    |    |    |    |    |    |    |    |    |    |    |    |    |    |    |    |    |    |    |    |    |    |    |    |    |    |    |    |    |    |    |    |    |    |    |    |    |    |    |
| 19 | 19                                                                                                                           |                                                                                                                                                      |                                                                                                                                                                                                                                                                                                                                                                                                                                                                                                                                                                                                                                                                                                                                                                                                                                                                                                                                                                                                                                        |   |    |   |    |   |   |   |   |   |   |   |   |   |   |   |   |   |   |   |   |    |    |    |    |    |    |    |    |    |    |    |    |    |    |    |    |    |    |    |    |    |    |    |    |    |    |    |    |    |    |    |    |    |    |    |    |    |    |    |    |
| 20 | 20                                                                                                                           |                                                                                                                                                      |                                                                                                                                                                                                                                                                                                                                                                                                                                                                                                                                                                                                                                                                                                                                                                                                                                                                                                                                                                                                                                        |   |    |   |    |   |   |   |   |   |   |   |   |   |   |   |   |   |   |   |   |    |    |    |    |    |    |    |    |    |    |    |    |    |    |    |    |    |    |    |    |    |    |    |    |    |    |    |    |    |    |    |    |    |    |    |    |    |    |    |    |
| 21 | 21                                                                                                                           |                                                                                                                                                      |                                                                                                                                                                                                                                                                                                                                                                                                                                                                                                                                                                                                                                                                                                                                                                                                                                                                                                                                                                                                                                        |   |    |   |    |   |   |   |   |   |   |   |   |   |   |   |   |   |   |   |   |    |    |    |    |    |    |    |    |    |    |    |    |    |    |    |    |    |    |    |    |    |    |    |    |    |    |    |    |    |    |    |    |    |    |    |    |    |    |    |    |
| 22 | 22                                                                                                                           |                                                                                                                                                      |                                                                                                                                                                                                                                                                                                                                                                                                                                                                                                                                                                                                                                                                                                                                                                                                                                                                                                                                                                                                                                        |   |    |   |    |   |   |   |   |   |   |   |   |   |   |   |   |   |   |   |   |    |    |    |    |    |    |    |    |    |    |    |    |    |    |    |    |    |    |    |    |    |    |    |    |    |    |    |    |    |    |    |    |    |    |    |    |    |    |    |    |
| 23 | 23                                                                                                                           |                                                                                                                                                      |                                                                                                                                                                                                                                                                                                                                                                                                                                                                                                                                                                                                                                                                                                                                                                                                                                                                                                                                                                                                                                        |   |    |   |    |   |   |   |   |   |   |   |   |   |   |   |   |   |   |   |   |    |    |    |    |    |    |    |    |    |    |    |    |    |    |    |    |    |    |    |    |    |    |    |    |    |    |    |    |    |    |    |    |    |    |    |    |    |    |    |    |
| 24 | 24                                                                                                                           |                                                                                                                                                      |                                                                                                                                                                                                                                                                                                                                                                                                                                                                                                                                                                                                                                                                                                                                                                                                                                                                                                                                                                                                                                        |   |    |   |    |   |   |   |   |   |   |   |   |   |   |   |   |   |   |   |   |    |    |    |    |    |    |    |    |    |    |    |    |    |    |    |    |    |    |    |    |    |    |    |    |    |    |    |    |    |    |    |    |    |    |    |    |    |    |    |    |
| 25 | 25                                                                                                                           |                                                                                                                                                      |                                                                                                                                                                                                                                                                                                                                                                                                                                                                                                                                                                                                                                                                                                                                                                                                                                                                                                                                                                                                                                        |   |    |   |    |   |   |   |   |   |   |   |   |   |   |   |   |   |   |   |   |    |    |    |    |    |    |    |    |    |    |    |    |    |    |    |    |    |    |    |    |    |    |    |    |    |    |    |    |    |    |    |    |    |    |    |    |    |    |    |    |
| 26 | 26                                                                                                                           |                                                                                                                                                      |                                                                                                                                                                                                                                                                                                                                                                                                                                                                                                                                                                                                                                                                                                                                                                                                                                                                                                                                                                                                                                        |   |    |   |    |   |   |   |   |   |   |   |   |   |   |   |   |   |   |   |   |    |    |    |    |    |    |    |    |    |    |    |    |    |    |    |    |    |    |    |    |    |    |    |    |    |    |    |    |    |    |    |    |    |    |    |    |    |    |    |    |
| 27 | 27                                                                                                                           |                                                                                                                                                      |                                                                                                                                                                                                                                                                                                                                                                                                                                                                                                                                                                                                                                                                                                                                                                                                                                                                                                                                                                                                                                        |   |    |   |    |   |   |   |   |   |   |   |   |   |   |   |   |   |   |   |   |    |    |    |    |    |    |    |    |    |    |    |    |    |    |    |    |    |    |    |    |    |    |    |    |    |    |    |    |    |    |    |    |    |    |    |    |    |    |    |    |
| 28 | 28                                                                                                                           |                                                                                                                                                      |                                                                                                                                                                                                                                                                                                                                                                                                                                                                                                                                                                                                                                                                                                                                                                                                                                                                                                                                                                                                                                        |   |    |   |    |   |   |   |   |   |   |   |   |   |   |   |   |   |   |   |   |    |    |    |    |    |    |    |    |    |    |    |    |    |    |    |    |    |    |    |    |    |    |    |    |    |    |    |    |    |    |    |    |    |    |    |    |    |    |    |    |
| 29 | 29                                                                                                                           |                                                                                                                                                      |                                                                                                                                                                                                                                                                                                                                                                                                                                                                                                                                                                                                                                                                                                                                                                                                                                                                                                                                                                                                                                        |   |    |   |    |   |   |   |   |   |   |   |   |   |   |   |   |   |   |   |   |    |    |    |    |    |    |    |    |    |    |    |    |    |    |    |    |    |    |    |    |    |    |    |    |    |    |    |    |    |    |    |    |    |    |    |    |    |    |    |    |
| 5  | <p>respuestas_iguales</p> <p>Mostrar el archivo SÓLO si:<br/>[minuto]&lt;&gt;'0' and [minuto]&lt;&gt;'&gt;'</p>              | <p>3.- ¿Las respuestas a TODAS las preguntas del cuestionario para este minuto son EXACTAMENTE iguales a las del minuto inmediatamente anterior?</p> | <p>yesno</p> <table border="1"> <tr><td>1</td><td>Si</td></tr> <tr><td>0</td><td>No</td></tr> </table>                                                                                                                                                                                                                                                                                                                                                                                                                                                                                                                                                                                                                                                                                                                                                                                                                                                                                                                                 | 1 | Si | 0 | No |   |   |   |   |   |   |   |   |   |   |   |   |   |   |   |   |    |    |    |    |    |    |    |    |    |    |    |    |    |    |    |    |    |    |    |    |    |    |    |    |    |    |    |    |    |    |    |    |    |    |    |    |    |    |    |    |
| 1  | Si                                                                                                                           |                                                                                                                                                      |                                                                                                                                                                                                                                                                                                                                                                                                                                                                                                                                                                                                                                                                                                                                                                                                                                                                                                                                                                                                                                        |   |    |   |    |   |   |   |   |   |   |   |   |   |   |   |   |   |   |   |   |    |    |    |    |    |    |    |    |    |    |    |    |    |    |    |    |    |    |    |    |    |    |    |    |    |    |    |    |    |    |    |    |    |    |    |    |    |    |    |    |
| 0  | No                                                                                                                           |                                                                                                                                                      |                                                                                                                                                                                                                                                                                                                                                                                                                                                                                                                                                                                                                                                                                                                                                                                                                                                                                                                                                                                                                                        |   |    |   |    |   |   |   |   |   |   |   |   |   |   |   |   |   |   |   |   |    |    |    |    |    |    |    |    |    |    |    |    |    |    |    |    |    |    |    |    |    |    |    |    |    |    |    |    |    |    |    |    |    |    |    |    |    |    |    |    |
| 6  | <p>fecha_emision</p> <p>Mostrar el archivo SÓLO si:<br/>[minuto]='0' or [minuto]&lt;&gt;'0' and [respuestas_iguales]='0'</p> | <p>4.- Fecha de emisión:</p>                                                                                                                         | <p>text (date_dmy)</p>                                                                                                                                                                                                                                                                                                                                                                                                                                                                                                                                                                                                                                                                                                                                                                                                                                                                                                                                                                                                                 |   |    |   |    |   |   |   |   |   |   |   |   |   |   |   |   |   |   |   |   |    |    |    |    |    |    |    |    |    |    |    |    |    |    |    |    |    |    |    |    |    |    |    |    |    |    |    |    |    |    |    |    |    |    |    |    |    |    |    |    |

23/10/2020

FONIS TABACO V2.0 | REDCap

|                 |                                                                                                                    |                                                                                                                          |                                                                                                                                                                                                                                                                                                                                                                                                                                                                                                                                                                                                                                                                                                                                       |     |             |     |              |     |                        |          |              |                 |                 |             |                         |                |                |                |                |               |               |             |             |        |        |      |      |     |     |     |     |        |     |
|-----------------|--------------------------------------------------------------------------------------------------------------------|--------------------------------------------------------------------------------------------------------------------------|---------------------------------------------------------------------------------------------------------------------------------------------------------------------------------------------------------------------------------------------------------------------------------------------------------------------------------------------------------------------------------------------------------------------------------------------------------------------------------------------------------------------------------------------------------------------------------------------------------------------------------------------------------------------------------------------------------------------------------------|-----|-------------|-----|--------------|-----|------------------------|----------|--------------|-----------------|-----------------|-------------|-------------------------|----------------|----------------|----------------|----------------|---------------|---------------|-------------|-------------|--------|--------|------|------|-----|-----|-----|-----|--------|-----|
| 7               | bloque_horario<br><br>Mostrar el archivo SÓLO si:<br>[minuto]='0' or [minuto]<>'0'<br>and [respuestas_iguales]='0' | 5.- Bloque horario de Emisión:                                                                                           | radio<br><table border="1"> <tr><td>1</td><td>20:00-20:29</td></tr> <tr><td>2</td><td>20:30-20:59</td></tr> <tr><td>3</td><td>21:00-21:29</td></tr> <tr><td>4</td><td>21:30-21:59</td></tr> <tr><td>5</td><td>22:00-22:29</td></tr> <tr><td>6</td><td>22:30-22:59</td></tr> <tr><td>7</td><td>23:00-23:29</td></tr> <tr><td>8</td><td>23:30-23:59</td></tr> <tr><td>9</td><td>00:00-00:29</td></tr> <tr><td>10</td><td>00:30-00:59</td></tr> </table>                                                                                                                                                                                                                                                                                 | 1   | 20:00-20:29 | 2   | 20:30-20:59  | 3   | 21:00-21:29            | 4        | 21:30-21:59  | 5               | 22:00-22:29     | 6           | 22:30-22:59             | 7              | 23:00-23:29    | 8              | 23:30-23:59    | 9             | 00:00-00:29   | 10          | 00:30-00:59 |        |        |      |      |     |     |     |     |        |     |
| 1               | 20:00-20:29                                                                                                        |                                                                                                                          |                                                                                                                                                                                                                                                                                                                                                                                                                                                                                                                                                                                                                                                                                                                                       |     |             |     |              |     |                        |          |              |                 |                 |             |                         |                |                |                |                |               |               |             |             |        |        |      |      |     |     |     |     |        |     |
| 2               | 20:30-20:59                                                                                                        |                                                                                                                          |                                                                                                                                                                                                                                                                                                                                                                                                                                                                                                                                                                                                                                                                                                                                       |     |             |     |              |     |                        |          |              |                 |                 |             |                         |                |                |                |                |               |               |             |             |        |        |      |      |     |     |     |     |        |     |
| 3               | 21:00-21:29                                                                                                        |                                                                                                                          |                                                                                                                                                                                                                                                                                                                                                                                                                                                                                                                                                                                                                                                                                                                                       |     |             |     |              |     |                        |          |              |                 |                 |             |                         |                |                |                |                |               |               |             |             |        |        |      |      |     |     |     |     |        |     |
| 4               | 21:30-21:59                                                                                                        |                                                                                                                          |                                                                                                                                                                                                                                                                                                                                                                                                                                                                                                                                                                                                                                                                                                                                       |     |             |     |              |     |                        |          |              |                 |                 |             |                         |                |                |                |                |               |               |             |             |        |        |      |      |     |     |     |     |        |     |
| 5               | 22:00-22:29                                                                                                        |                                                                                                                          |                                                                                                                                                                                                                                                                                                                                                                                                                                                                                                                                                                                                                                                                                                                                       |     |             |     |              |     |                        |          |              |                 |                 |             |                         |                |                |                |                |               |               |             |             |        |        |      |      |     |     |     |     |        |     |
| 6               | 22:30-22:59                                                                                                        |                                                                                                                          |                                                                                                                                                                                                                                                                                                                                                                                                                                                                                                                                                                                                                                                                                                                                       |     |             |     |              |     |                        |          |              |                 |                 |             |                         |                |                |                |                |               |               |             |             |        |        |      |      |     |     |     |     |        |     |
| 7               | 23:00-23:29                                                                                                        |                                                                                                                          |                                                                                                                                                                                                                                                                                                                                                                                                                                                                                                                                                                                                                                                                                                                                       |     |             |     |              |     |                        |          |              |                 |                 |             |                         |                |                |                |                |               |               |             |             |        |        |      |      |     |     |     |     |        |     |
| 8               | 23:30-23:59                                                                                                        |                                                                                                                          |                                                                                                                                                                                                                                                                                                                                                                                                                                                                                                                                                                                                                                                                                                                                       |     |             |     |              |     |                        |          |              |                 |                 |             |                         |                |                |                |                |               |               |             |             |        |        |      |      |     |     |     |     |        |     |
| 9               | 00:00-00:29                                                                                                        |                                                                                                                          |                                                                                                                                                                                                                                                                                                                                                                                                                                                                                                                                                                                                                                                                                                                                       |     |             |     |              |     |                        |          |              |                 |                 |             |                         |                |                |                |                |               |               |             |             |        |        |      |      |     |     |     |     |        |     |
| 10              | 00:30-00:59                                                                                                        |                                                                                                                          |                                                                                                                                                                                                                                                                                                                                                                                                                                                                                                                                                                                                                                                                                                                                       |     |             |     |              |     |                        |          |              |                 |                 |             |                         |                |                |                |                |               |               |             |             |        |        |      |      |     |     |     |     |        |     |
| 8               | canal<br><br>Mostrar el archivo SÓLO si:<br>[minuto]='0' or [minuto]<>'0'<br>and [respuestas_iguales]='0'          | 6.- Canal de TV:                                                                                                         | dropdown (autocomplete)<br><table border="1"> <tr><td>AyE</td><td>A&amp;E</td></tr> <tr><td>AMC</td><td>AMC</td></tr> <tr><td>AXN</td><td>AXN</td></tr> <tr><td>Canal_13</td><td>Canal 13</td></tr> <tr><td>Cartoon_Network</td><td>Cartoon Network</td></tr> <tr><td>Chilevision</td><td>Chilevisión</td></tr> <tr><td>Discovery_Kids</td><td>Discovery Kids</td></tr> <tr><td>Disney_Channel</td><td>Disney Channel</td></tr> <tr><td>Disney_Junior</td><td>Disney Junior</td></tr> <tr><td>Fox_Channel</td><td>Fox Channel</td></tr> <tr><td>La_Red</td><td>La Red</td></tr> <tr><td>Mega</td><td>Mega</td></tr> <tr><td>TNT</td><td>TNT</td></tr> <tr><td>TVN</td><td>TVN</td></tr> <tr><td>TV_mas</td><td>TV+</td></tr> </table> | AyE | A&E         | AMC | AMC          | AXN | AXN                    | Canal_13 | Canal 13     | Cartoon_Network | Cartoon Network | Chilevision | Chilevisión             | Discovery_Kids | Discovery Kids | Disney_Channel | Disney Channel | Disney_Junior | Disney Junior | Fox_Channel | Fox Channel | La_Red | La Red | Mega | Mega | TNT | TNT | TVN | TVN | TV_mas | TV+ |
| AyE             | A&E                                                                                                                |                                                                                                                          |                                                                                                                                                                                                                                                                                                                                                                                                                                                                                                                                                                                                                                                                                                                                       |     |             |     |              |     |                        |          |              |                 |                 |             |                         |                |                |                |                |               |               |             |             |        |        |      |      |     |     |     |     |        |     |
| AMC             | AMC                                                                                                                |                                                                                                                          |                                                                                                                                                                                                                                                                                                                                                                                                                                                                                                                                                                                                                                                                                                                                       |     |             |     |              |     |                        |          |              |                 |                 |             |                         |                |                |                |                |               |               |             |             |        |        |      |      |     |     |     |     |        |     |
| AXN             | AXN                                                                                                                |                                                                                                                          |                                                                                                                                                                                                                                                                                                                                                                                                                                                                                                                                                                                                                                                                                                                                       |     |             |     |              |     |                        |          |              |                 |                 |             |                         |                |                |                |                |               |               |             |             |        |        |      |      |     |     |     |     |        |     |
| Canal_13        | Canal 13                                                                                                           |                                                                                                                          |                                                                                                                                                                                                                                                                                                                                                                                                                                                                                                                                                                                                                                                                                                                                       |     |             |     |              |     |                        |          |              |                 |                 |             |                         |                |                |                |                |               |               |             |             |        |        |      |      |     |     |     |     |        |     |
| Cartoon_Network | Cartoon Network                                                                                                    |                                                                                                                          |                                                                                                                                                                                                                                                                                                                                                                                                                                                                                                                                                                                                                                                                                                                                       |     |             |     |              |     |                        |          |              |                 |                 |             |                         |                |                |                |                |               |               |             |             |        |        |      |      |     |     |     |     |        |     |
| Chilevision     | Chilevisión                                                                                                        |                                                                                                                          |                                                                                                                                                                                                                                                                                                                                                                                                                                                                                                                                                                                                                                                                                                                                       |     |             |     |              |     |                        |          |              |                 |                 |             |                         |                |                |                |                |               |               |             |             |        |        |      |      |     |     |     |     |        |     |
| Discovery_Kids  | Discovery Kids                                                                                                     |                                                                                                                          |                                                                                                                                                                                                                                                                                                                                                                                                                                                                                                                                                                                                                                                                                                                                       |     |             |     |              |     |                        |          |              |                 |                 |             |                         |                |                |                |                |               |               |             |             |        |        |      |      |     |     |     |     |        |     |
| Disney_Channel  | Disney Channel                                                                                                     |                                                                                                                          |                                                                                                                                                                                                                                                                                                                                                                                                                                                                                                                                                                                                                                                                                                                                       |     |             |     |              |     |                        |          |              |                 |                 |             |                         |                |                |                |                |               |               |             |             |        |        |      |      |     |     |     |     |        |     |
| Disney_Junior   | Disney Junior                                                                                                      |                                                                                                                          |                                                                                                                                                                                                                                                                                                                                                                                                                                                                                                                                                                                                                                                                                                                                       |     |             |     |              |     |                        |          |              |                 |                 |             |                         |                |                |                |                |               |               |             |             |        |        |      |      |     |     |     |     |        |     |
| Fox_Channel     | Fox Channel                                                                                                        |                                                                                                                          |                                                                                                                                                                                                                                                                                                                                                                                                                                                                                                                                                                                                                                                                                                                                       |     |             |     |              |     |                        |          |              |                 |                 |             |                         |                |                |                |                |               |               |             |             |        |        |      |      |     |     |     |     |        |     |
| La_Red          | La Red                                                                                                             |                                                                                                                          |                                                                                                                                                                                                                                                                                                                                                                                                                                                                                                                                                                                                                                                                                                                                       |     |             |     |              |     |                        |          |              |                 |                 |             |                         |                |                |                |                |               |               |             |             |        |        |      |      |     |     |     |     |        |     |
| Mega            | Mega                                                                                                               |                                                                                                                          |                                                                                                                                                                                                                                                                                                                                                                                                                                                                                                                                                                                                                                                                                                                                       |     |             |     |              |     |                        |          |              |                 |                 |             |                         |                |                |                |                |               |               |             |             |        |        |      |      |     |     |     |     |        |     |
| TNT             | TNT                                                                                                                |                                                                                                                          |                                                                                                                                                                                                                                                                                                                                                                                                                                                                                                                                                                                                                                                                                                                                       |     |             |     |              |     |                        |          |              |                 |                 |             |                         |                |                |                |                |               |               |             |             |        |        |      |      |     |     |     |     |        |     |
| TVN             | TVN                                                                                                                |                                                                                                                          |                                                                                                                                                                                                                                                                                                                                                                                                                                                                                                                                                                                                                                                                                                                                       |     |             |     |              |     |                        |          |              |                 |                 |             |                         |                |                |                |                |               |               |             |             |        |        |      |      |     |     |     |     |        |     |
| TV_mas          | TV+                                                                                                                |                                                                                                                          |                                                                                                                                                                                                                                                                                                                                                                                                                                                                                                                                                                                                                                                                                                                                       |     |             |     |              |     |                        |          |              |                 |                 |             |                         |                |                |                |                |               |               |             |             |        |        |      |      |     |     |     |     |        |     |
| 9               | emision<br><br>Mostrar el archivo SÓLO si:<br>[respuestas_iguales]='0' or [minuto]='0'                             | Section Header:<br><br>8.- En este minuto ¿Ves o escuchas, aunque sea parcialmente, un anuncio por al menos 10 segundos? | radio<br><table border="1"> <tr><td>1</td><td>Sí</td></tr> <tr><td>0</td><td>No</td></tr> </table>                                                                                                                                                                                                                                                                                                                                                                                                                                                                                                                                                                                                                                    | 1   | Sí          | 0   | No           |     |                        |          |              |                 |                 |             |                         |                |                |                |                |               |               |             |             |        |        |      |      |     |     |     |     |        |     |
| 1               | Sí                                                                                                                 |                                                                                                                          |                                                                                                                                                                                                                                                                                                                                                                                                                                                                                                                                                                                                                                                                                                                                       |     |             |     |              |     |                        |          |              |                 |                 |             |                         |                |                |                |                |               |               |             |             |        |        |      |      |     |     |     |     |        |     |
| 0               | No                                                                                                                 |                                                                                                                          |                                                                                                                                                                                                                                                                                                                                                                                                                                                                                                                                                                                                                                                                                                                                       |     |             |     |              |     |                        |          |              |                 |                 |             |                         |                |                |                |                |               |               |             |             |        |        |      |      |     |     |     |     |        |     |
| 10              | tabaco_sn<br><br>Mostrar el archivo SÓLO si:<br>[emision]='1'                                                      | 9.- ¿Es un anuncio de tabaco?                                                                                            | radio<br><table border="1"> <tr><td>1</td><td>Sí</td></tr> <tr><td>0</td><td>No</td></tr> <tr><td>2</td><td>No se puede determinar</td></tr> </table>                                                                                                                                                                                                                                                                                                                                                                                                                                                                                                                                                                                 | 1   | Sí          | 0   | No           | 2   | No se puede determinar |          |              |                 |                 |             |                         |                |                |                |                |               |               |             |             |        |        |      |      |     |     |     |     |        |     |
| 1               | Sí                                                                                                                 |                                                                                                                          |                                                                                                                                                                                                                                                                                                                                                                                                                                                                                                                                                                                                                                                                                                                                       |     |             |     |              |     |                        |          |              |                 |                 |             |                         |                |                |                |                |               |               |             |             |        |        |      |      |     |     |     |     |        |     |
| 0               | No                                                                                                                 |                                                                                                                          |                                                                                                                                                                                                                                                                                                                                                                                                                                                                                                                                                                                                                                                                                                                                       |     |             |     |              |     |                        |          |              |                 |                 |             |                         |                |                |                |                |               |               |             |             |        |        |      |      |     |     |     |     |        |     |
| 2               | No se puede determinar                                                                                             |                                                                                                                          |                                                                                                                                                                                                                                                                                                                                                                                                                                                                                                                                                                                                                                                                                                                                       |     |             |     |              |     |                        |          |              |                 |                 |             |                         |                |                |                |                |               |               |             |             |        |        |      |      |     |     |     |     |        |     |
| 11              | tabaco_tipo<br><br>Mostrar el archivo SÓLO si:<br>[tabaco_sn]='1'                                                  | 10.- ¿Qué tipo de producto de tabaco se anuncia?                                                                         | radio<br><table border="1"> <tr><td>1</td><td>Cigarrillo</td></tr> <tr><td>2</td><td>Cigarro-puro</td></tr> <tr><td>3</td><td>Pipa</td></tr> <tr><td>4</td><td>Pipa de agua</td></tr> <tr><td>5</td><td>Vaporizador</td></tr> <tr><td>99</td><td>Otro producto de tabaco</td></tr> </table>                                                                                                                                                                                                                                                                                                                                                                                                                                           | 1   | Cigarrillo  | 2   | Cigarro-puro | 3   | Pipa                   | 4        | Pipa de agua | 5               | Vaporizador     | 99          | Otro producto de tabaco |                |                |                |                |               |               |             |             |        |        |      |      |     |     |     |     |        |     |
| 1               | Cigarrillo                                                                                                         |                                                                                                                          |                                                                                                                                                                                                                                                                                                                                                                                                                                                                                                                                                                                                                                                                                                                                       |     |             |     |              |     |                        |          |              |                 |                 |             |                         |                |                |                |                |               |               |             |             |        |        |      |      |     |     |     |     |        |     |
| 2               | Cigarro-puro                                                                                                       |                                                                                                                          |                                                                                                                                                                                                                                                                                                                                                                                                                                                                                                                                                                                                                                                                                                                                       |     |             |     |              |     |                        |          |              |                 |                 |             |                         |                |                |                |                |               |               |             |             |        |        |      |      |     |     |     |     |        |     |
| 3               | Pipa                                                                                                               |                                                                                                                          |                                                                                                                                                                                                                                                                                                                                                                                                                                                                                                                                                                                                                                                                                                                                       |     |             |     |              |     |                        |          |              |                 |                 |             |                         |                |                |                |                |               |               |             |             |        |        |      |      |     |     |     |     |        |     |
| 4               | Pipa de agua                                                                                                       |                                                                                                                          |                                                                                                                                                                                                                                                                                                                                                                                                                                                                                                                                                                                                                                                                                                                                       |     |             |     |              |     |                        |          |              |                 |                 |             |                         |                |                |                |                |               |               |             |             |        |        |      |      |     |     |     |     |        |     |
| 5               | Vaporizador                                                                                                        |                                                                                                                          |                                                                                                                                                                                                                                                                                                                                                                                                                                                                                                                                                                                                                                                                                                                                       |     |             |     |              |     |                        |          |              |                 |                 |             |                         |                |                |                |                |               |               |             |             |        |        |      |      |     |     |     |     |        |     |
| 99              | Otro producto de tabaco                                                                                            |                                                                                                                          |                                                                                                                                                                                                                                                                                                                                                                                                                                                                                                                                                                                                                                                                                                                                       |     |             |     |              |     |                        |          |              |                 |                 |             |                         |                |                |                |                |               |               |             |             |        |        |      |      |     |     |     |     |        |     |

23/10/2020

FONIS TABACO V2.0 | REDCap

|    |                                                                                                                                                                                                                                                                                                                                                       |                                                                                                             |                                                                                                                                                                                                                                                                                                                                                                                         |   |                 |   |              |    |      |   |              |   |          |   |           |   |               |    |      |   |               |
|----|-------------------------------------------------------------------------------------------------------------------------------------------------------------------------------------------------------------------------------------------------------------------------------------------------------------------------------------------------------|-------------------------------------------------------------------------------------------------------------|-----------------------------------------------------------------------------------------------------------------------------------------------------------------------------------------------------------------------------------------------------------------------------------------------------------------------------------------------------------------------------------------|---|-----------------|---|--------------|----|------|---|--------------|---|----------|---|-----------|---|---------------|----|------|---|---------------|
| 12 | tabaco_marca<br>Mostrar el archivo SÓLO si:<br>[tabaco_tipo]='1'                                                                                                                                                                                                                                                                                      | 11.- Si es de cigarrillos ¿Qué marca de cigarrillos?                                                        | radio<br><table border="1"> <tr><td>1</td><td>Dunhill</td></tr> <tr><td>2</td><td>Kent</td></tr> <tr><td>3</td><td>L&amp;M</td></tr> <tr><td>4</td><td>Lucky Strike</td></tr> <tr><td>5</td><td>Marlboro</td></tr> <tr><td>6</td><td>Pall Mall</td></tr> <tr><td>7</td><td>Philip Morris</td></tr> <tr><td>99</td><td>Otra</td></tr> <tr><td>0</td><td>Indeterminada</td></tr> </table> | 1 | Dunhill         | 2 | Kent         | 3  | L&M  | 4 | Lucky Strike | 5 | Marlboro | 6 | Pall Mall | 7 | Philip Morris | 99 | Otra | 0 | Indeterminada |
| 1  | Dunhill                                                                                                                                                                                                                                                                                                                                               |                                                                                                             |                                                                                                                                                                                                                                                                                                                                                                                         |   |                 |   |              |    |      |   |              |   |          |   |           |   |               |    |      |   |               |
| 2  | Kent                                                                                                                                                                                                                                                                                                                                                  |                                                                                                             |                                                                                                                                                                                                                                                                                                                                                                                         |   |                 |   |              |    |      |   |              |   |          |   |           |   |               |    |      |   |               |
| 3  | L&M                                                                                                                                                                                                                                                                                                                                                   |                                                                                                             |                                                                                                                                                                                                                                                                                                                                                                                         |   |                 |   |              |    |      |   |              |   |          |   |           |   |               |    |      |   |               |
| 4  | Lucky Strike                                                                                                                                                                                                                                                                                                                                          |                                                                                                             |                                                                                                                                                                                                                                                                                                                                                                                         |   |                 |   |              |    |      |   |              |   |          |   |           |   |               |    |      |   |               |
| 5  | Marlboro                                                                                                                                                                                                                                                                                                                                              |                                                                                                             |                                                                                                                                                                                                                                                                                                                                                                                         |   |                 |   |              |    |      |   |              |   |          |   |           |   |               |    |      |   |               |
| 6  | Pall Mall                                                                                                                                                                                                                                                                                                                                             |                                                                                                             |                                                                                                                                                                                                                                                                                                                                                                                         |   |                 |   |              |    |      |   |              |   |          |   |           |   |               |    |      |   |               |
| 7  | Philip Morris                                                                                                                                                                                                                                                                                                                                         |                                                                                                             |                                                                                                                                                                                                                                                                                                                                                                                         |   |                 |   |              |    |      |   |              |   |          |   |           |   |               |    |      |   |               |
| 99 | Otra                                                                                                                                                                                                                                                                                                                                                  |                                                                                                             |                                                                                                                                                                                                                                                                                                                                                                                         |   |                 |   |              |    |      |   |              |   |          |   |           |   |               |    |      |   |               |
| 0  | Indeterminada                                                                                                                                                                                                                                                                                                                                         |                                                                                                             |                                                                                                                                                                                                                                                                                                                                                                                         |   |                 |   |              |    |      |   |              |   |          |   |           |   |               |    |      |   |               |
| 13 | otra_marca_cig<br>Mostrar el archivo SÓLO si:<br>[tabaco_marca]=99                                                                                                                                                                                                                                                                                    | 11.1.- Otra marca de cigariillo:                                                                            | text                                                                                                                                                                                                                                                                                                                                                                                    |   |                 |   |              |    |      |   |              |   |          |   |           |   |               |    |      |   |               |
| 14 | programa_sn<br>Mostrar el archivo SÓLO si:<br>[minuto]='0' and ([emision]<br>='0' or ([tabaco_sn]='0' or [tab<br>aco_sn]='2' or [tabaco_tipo]<<br>>' or [tabaco_marca]<>'')) or<br>([minuto]<>'0' and ([emision]<br>='0' or ([tabaco_sn]='0' or [tab<br>aco_sn]='2' or [tabaco_tipo]<<br>>' or [tabaco_marca]<>'')) and<br>[respuestas_iguales]<>'1') | 12.- En este minuto ¿ves o escuchas, aunque no sea en su totalidad (por al menos 10 segundos), un programa? | radio<br><table border="1"> <tr><td>1</td><td>Sí</td></tr> <tr><td>0</td><td>No</td></tr> </table>                                                                                                                                                                                                                                                                                      | 1 | Sí              | 0 | No           |    |      |   |              |   |          |   |           |   |               |    |      |   |               |
| 1  | Sí                                                                                                                                                                                                                                                                                                                                                    |                                                                                                             |                                                                                                                                                                                                                                                                                                                                                                                         |   |                 |   |              |    |      |   |              |   |          |   |           |   |               |    |      |   |               |
| 0  | No                                                                                                                                                                                                                                                                                                                                                    |                                                                                                             |                                                                                                                                                                                                                                                                                                                                                                                         |   |                 |   |              |    |      |   |              |   |          |   |           |   |               |    |      |   |               |
| 15 | noyno<br>Mostrar el archivo SÓLO si:<br>[emision]='0' and [programa_<br>sn]='0'                                                                                                                                                                                                                                                                       | DEBES SELECCIONAR QUE VISTE UN ANUNCIO O UN PROGRAMA, NO ES POSIBLE QUE LA RESPUESTA SEA NEGATIVA A AMBOS.  | descriptive                                                                                                                                                                                                                                                                                                                                                                             |   |                 |   |              |    |      |   |              |   |          |   |           |   |               |    |      |   |               |
| 16 | mismo_programa<br>Mostrar el archivo SÓLO si:<br>[programa_sn]='1' AND [minu<br>to]<>'0'                                                                                                                                                                                                                                                              | 13.- ¿el programa que ves en este minuto es el mismo que has observado en el minuto anterior?               | yesno<br><table border="1"> <tr><td>1</td><td>Si</td></tr> <tr><td>0</td><td>No</td></tr> </table>                                                                                                                                                                                                                                                                                      | 1 | Si              | 0 | No           |    |      |   |              |   |          |   |           |   |               |    |      |   |               |
| 1  | Si                                                                                                                                                                                                                                                                                                                                                    |                                                                                                             |                                                                                                                                                                                                                                                                                                                                                                                         |   |                 |   |              |    |      |   |              |   |          |   |           |   |               |    |      |   |               |
| 0  | No                                                                                                                                                                                                                                                                                                                                                    |                                                                                                             |                                                                                                                                                                                                                                                                                                                                                                                         |   |                 |   |              |    |      |   |              |   |          |   |           |   |               |    |      |   |               |
| 17 | nombre_prog<br>Mostrar el archivo SÓLO si:<br>[programa_sn]='1' and ([minu<br>to]='0' or [mismo_programa]<br>='0')                                                                                                                                                                                                                                    | 14.- ¿Qué nombre tiene el programa? (Debe responder esta pregunta CON mayúsculas, sin tildes sin símbolos)  | text, Required                                                                                                                                                                                                                                                                                                                                                                          |   |                 |   |              |    |      |   |              |   |          |   |           |   |               |    |      |   |               |
| 18 | programa_genero<br>Mostrar el archivo SÓLO si:<br>([minuto]='0' and [programa_<br>sn]='1') or ([minuto]<>'0' and<br>[respuestas_iguales]<>'1' and<br>[mismo_programa]='0' and [p<br>rograma_sn]='1')                                                                                                                                                  | 15.- ¿A que tipo de género corresponde el programa?                                                         | radio<br><table border="1"> <tr><td>1</td><td>Entretenimiento</td></tr> <tr><td>2</td><td>Informativos</td></tr> <tr><td>99</td><td>Otro</td></tr> </table>                                                                                                                                                                                                                             | 1 | Entretenimiento | 2 | Informativos | 99 | Otro |   |              |   |          |   |           |   |               |    |      |   |               |
| 1  | Entretenimiento                                                                                                                                                                                                                                                                                                                                       |                                                                                                             |                                                                                                                                                                                                                                                                                                                                                                                         |   |                 |   |              |    |      |   |              |   |          |   |           |   |               |    |      |   |               |
| 2  | Informativos                                                                                                                                                                                                                                                                                                                                          |                                                                                                             |                                                                                                                                                                                                                                                                                                                                                                                         |   |                 |   |              |    |      |   |              |   |          |   |           |   |               |    |      |   |               |
| 99 | Otro                                                                                                                                                                                                                                                                                                                                                  |                                                                                                             |                                                                                                                                                                                                                                                                                                                                                                                         |   |                 |   |              |    |      |   |              |   |          |   |           |   |               |    |      |   |               |
| 19 | torpedo_continua                                                                                                                                                                                                                                                                                                                                      | CONTINUAR REVISIÓN AQUÍ                                                                                     | descriptive<br>Field Annotation: @HIDDEN                                                                                                                                                                                                                                                                                                                                                |   |                 |   |              |    |      |   |              |   |          |   |           |   |               |    |      |   |               |

23/10/2020

FONIS TABACO V2.0 | REDCap

|            |                                                                                                                                                                              |                                                                                                                                        |                                                                                                                                                                                                                                                                                                                                                                                                                                                                                                                       |   |                |           |                                                 |            |                                                      |          |                        |   |              |   |          |   |             |   |          |   |         |    |                    |
|------------|------------------------------------------------------------------------------------------------------------------------------------------------------------------------------|----------------------------------------------------------------------------------------------------------------------------------------|-----------------------------------------------------------------------------------------------------------------------------------------------------------------------------------------------------------------------------------------------------------------------------------------------------------------------------------------------------------------------------------------------------------------------------------------------------------------------------------------------------------------------|---|----------------|-----------|-------------------------------------------------|------------|------------------------------------------------------|----------|------------------------|---|--------------|---|----------|---|-------------|---|----------|---|---------|----|--------------------|
| 20         | programa_subgenero<br>Mostrar el archivo SÓLO si:<br>[programa_genero]='1'                                                                                                   | 16.- ¿Qué tipo de subgénero de entretenimiento es?                                                                                     | radio<br><table border="1"> <tr><td>1</td><td>Dibujo animado</td></tr> <tr><td>2</td><td>Película o telefilm no seriados (sin animación)</td></tr> <tr><td>3</td><td>Telenovelas (sin animación)</td></tr> <tr><td>4</td><td>Series (Sin animación)</td></tr> <tr><td>5</td><td>Reality show</td></tr> <tr><td>6</td><td>Concurso</td></tr> <tr><td>7</td><td>Humorístico</td></tr> <tr><td>8</td><td>Deportes</td></tr> <tr><td>9</td><td>Musical</td></tr> <tr><td>10</td><td>Variedades y otros</td></tr> </table> | 1 | Dibujo animado | 2         | Película o telefilm no seriados (sin animación) | 3          | Telenovelas (sin animación)                          | 4        | Series (Sin animación) | 5 | Reality show | 6 | Concurso | 7 | Humorístico | 8 | Deportes | 9 | Musical | 10 | Variedades y otros |
| 1          | Dibujo animado                                                                                                                                                               |                                                                                                                                        |                                                                                                                                                                                                                                                                                                                                                                                                                                                                                                                       |   |                |           |                                                 |            |                                                      |          |                        |   |              |   |          |   |             |   |          |   |         |    |                    |
| 2          | Película o telefilm no seriados (sin animación)                                                                                                                              |                                                                                                                                        |                                                                                                                                                                                                                                                                                                                                                                                                                                                                                                                       |   |                |           |                                                 |            |                                                      |          |                        |   |              |   |          |   |             |   |          |   |         |    |                    |
| 3          | Telenovelas (sin animación)                                                                                                                                                  |                                                                                                                                        |                                                                                                                                                                                                                                                                                                                                                                                                                                                                                                                       |   |                |           |                                                 |            |                                                      |          |                        |   |              |   |          |   |             |   |          |   |         |    |                    |
| 4          | Series (Sin animación)                                                                                                                                                       |                                                                                                                                        |                                                                                                                                                                                                                                                                                                                                                                                                                                                                                                                       |   |                |           |                                                 |            |                                                      |          |                        |   |              |   |          |   |             |   |          |   |         |    |                    |
| 5          | Reality show                                                                                                                                                                 |                                                                                                                                        |                                                                                                                                                                                                                                                                                                                                                                                                                                                                                                                       |   |                |           |                                                 |            |                                                      |          |                        |   |              |   |          |   |             |   |          |   |         |    |                    |
| 6          | Concurso                                                                                                                                                                     |                                                                                                                                        |                                                                                                                                                                                                                                                                                                                                                                                                                                                                                                                       |   |                |           |                                                 |            |                                                      |          |                        |   |              |   |          |   |             |   |          |   |         |    |                    |
| 7          | Humorístico                                                                                                                                                                  |                                                                                                                                        |                                                                                                                                                                                                                                                                                                                                                                                                                                                                                                                       |   |                |           |                                                 |            |                                                      |          |                        |   |              |   |          |   |             |   |          |   |         |    |                    |
| 8          | Deportes                                                                                                                                                                     |                                                                                                                                        |                                                                                                                                                                                                                                                                                                                                                                                                                                                                                                                       |   |                |           |                                                 |            |                                                      |          |                        |   |              |   |          |   |             |   |          |   |         |    |                    |
| 9          | Musical                                                                                                                                                                      |                                                                                                                                        |                                                                                                                                                                                                                                                                                                                                                                                                                                                                                                                       |   |                |           |                                                 |            |                                                      |          |                        |   |              |   |          |   |             |   |          |   |         |    |                    |
| 10         | Variedades y otros                                                                                                                                                           |                                                                                                                                        |                                                                                                                                                                                                                                                                                                                                                                                                                                                                                                                       |   |                |           |                                                 |            |                                                      |          |                        |   |              |   |          |   |             |   |          |   |         |    |                    |
| 21         | informativo_tipo<br>Mostrar el archivo SÓLO si:<br>[programa_genero]='2'                                                                                                     | 17.- ¿Qué tipo de subgénero informativo es?                                                                                            | radio<br><table border="1"> <tr><td>4</td><td>Noticiario</td></tr> <tr><td>Reportaje</td><td>documental, informes periodísticos y similares</td></tr> <tr><td>Entrevista</td><td>rueda informativa, conferencia de prensa y similares</td></tr> <tr><td>Coloquio</td><td>debate y similares</td></tr> <tr><td>5</td><td>Otro</td></tr> </table>                                                                                                                                                                       | 4 | Noticiario     | Reportaje | documental, informes periodísticos y similares  | Entrevista | rueda informativa, conferencia de prensa y similares | Coloquio | debate y similares     | 5 | Otro         |   |          |   |             |   |          |   |         |    |                    |
| 4          | Noticiario                                                                                                                                                                   |                                                                                                                                        |                                                                                                                                                                                                                                                                                                                                                                                                                                                                                                                       |   |                |           |                                                 |            |                                                      |          |                        |   |              |   |          |   |             |   |          |   |         |    |                    |
| Reportaje  | documental, informes periodísticos y similares                                                                                                                               |                                                                                                                                        |                                                                                                                                                                                                                                                                                                                                                                                                                                                                                                                       |   |                |           |                                                 |            |                                                      |          |                        |   |              |   |          |   |             |   |          |   |         |    |                    |
| Entrevista | rueda informativa, conferencia de prensa y similares                                                                                                                         |                                                                                                                                        |                                                                                                                                                                                                                                                                                                                                                                                                                                                                                                                       |   |                |           |                                                 |            |                                                      |          |                        |   |              |   |          |   |             |   |          |   |         |    |                    |
| Coloquio   | debate y similares                                                                                                                                                           |                                                                                                                                        |                                                                                                                                                                                                                                                                                                                                                                                                                                                                                                                       |   |                |           |                                                 |            |                                                      |          |                        |   |              |   |          |   |             |   |          |   |         |    |                    |
| 5          | Otro                                                                                                                                                                         |                                                                                                                                        |                                                                                                                                                                                                                                                                                                                                                                                                                                                                                                                       |   |                |           |                                                 |            |                                                      |          |                        |   |              |   |          |   |             |   |          |   |         |    |                    |
| 22         | programa_otro_subgenero<br>Mostrar el archivo SÓLO si:<br>[programa_genero]='99'                                                                                             | 18.- Si es un programa de otro género ¿Qué tipo de subgénero es?                                                                       | radio<br><table border="1"> <tr><td>1</td><td>Educativo</td></tr> <tr><td>2</td><td>Estilo de vida</td></tr> <tr><td>3</td><td>Religión</td></tr> <tr><td>4</td><td>Otro</td></tr> </table>                                                                                                                                                                                                                                                                                                                           | 1 | Educativo      | 2         | Estilo de vida                                  | 3          | Religión                                             | 4        | Otro                   |   |              |   |          |   |             |   |          |   |         |    |                    |
| 1          | Educativo                                                                                                                                                                    |                                                                                                                                        |                                                                                                                                                                                                                                                                                                                                                                                                                                                                                                                       |   |                |           |                                                 |            |                                                      |          |                        |   |              |   |          |   |             |   |          |   |         |    |                    |
| 2          | Estilo de vida                                                                                                                                                               |                                                                                                                                        |                                                                                                                                                                                                                                                                                                                                                                                                                                                                                                                       |   |                |           |                                                 |            |                                                      |          |                        |   |              |   |          |   |             |   |          |   |         |    |                    |
| 3          | Religión                                                                                                                                                                     |                                                                                                                                        |                                                                                                                                                                                                                                                                                                                                                                                                                                                                                                                       |   |                |           |                                                 |            |                                                      |          |                        |   |              |   |          |   |             |   |          |   |         |    |                    |
| 4          | Otro                                                                                                                                                                         |                                                                                                                                        |                                                                                                                                                                                                                                                                                                                                                                                                                                                                                                                       |   |                |           |                                                 |            |                                                      |          |                        |   |              |   |          |   |             |   |          |   |         |    |                    |
| 23         | produccion_chilena<br>Mostrar el archivo SÓLO si:<br>[programa_subgenero]<>" or [informativo_tipo]<>" or [programa_otro_subgenero]<>"                                        | 19.- ¿El programa es una producción chilena?                                                                                           | radio<br><table border="1"> <tr><td>1</td><td>Sí</td></tr> <tr><td>0</td><td>No</td></tr> <tr><td>2</td><td>No se sabe</td></tr> </table>                                                                                                                                                                                                                                                                                                                                                                             | 1 | Sí             | 0         | No                                              | 2          | No se sabe                                           |          |                        |   |              |   |          |   |             |   |          |   |         |    |                    |
| 1          | Sí                                                                                                                                                                           |                                                                                                                                        |                                                                                                                                                                                                                                                                                                                                                                                                                                                                                                                       |   |                |           |                                                 |            |                                                      |          |                        |   |              |   |          |   |             |   |          |   |         |    |                    |
| 0          | No                                                                                                                                                                           |                                                                                                                                        |                                                                                                                                                                                                                                                                                                                                                                                                                                                                                                                       |   |                |           |                                                 |            |                                                      |          |                        |   |              |   |          |   |             |   |          |   |         |    |                    |
| 2          | No se sabe                                                                                                                                                                   |                                                                                                                                        |                                                                                                                                                                                                                                                                                                                                                                                                                                                                                                                       |   |                |           |                                                 |            |                                                      |          |                        |   |              |   |          |   |             |   |          |   |         |    |                    |
| 24         | en_espaniol<br>Mostrar el archivo SÓLO si:<br>[produccion_chilena]<>"                                                                                                        | 20.- ¿El programa se escucha en español?                                                                                               | yesno<br><table border="1"> <tr><td>1</td><td>Sí</td></tr> <tr><td>0</td><td>No</td></tr> </table>                                                                                                                                                                                                                                                                                                                                                                                                                    | 1 | Sí             | 0         | No                                              |            |                                                      |          |                        |   |              |   |          |   |             |   |          |   |         |    |                    |
| 1          | Sí                                                                                                                                                                           |                                                                                                                                        |                                                                                                                                                                                                                                                                                                                                                                                                                                                                                                                       |   |                |           |                                                 |            |                                                      |          |                        |   |              |   |          |   |             |   |          |   |         |    |                    |
| 0          | No                                                                                                                                                                           |                                                                                                                                        |                                                                                                                                                                                                                                                                                                                                                                                                                                                                                                                       |   |                |           |                                                 |            |                                                      |          |                        |   |              |   |          |   |             |   |          |   |         |    |                    |
| 25         | tabaco_explicito<br>Mostrar el archivo SÓLO si:<br>([minuto]='0' and [en_espaniol]<>" ) or ([minuto]<>'0' and [mismo_programa]='1') or ([minuto]<>'0' and [en_espaniol]<>" ) | 21.- ¿Observa el uso explícito de tabaco en este minuto?                                                                               | yesno<br><table border="1"> <tr><td>1</td><td>Sí</td></tr> <tr><td>0</td><td>No</td></tr> </table>                                                                                                                                                                                                                                                                                                                                                                                                                    | 1 | Sí             | 0         | No                                              |            |                                                      |          |                        |   |              |   |          |   |             |   |          |   |         |    |                    |
| 1          | Sí                                                                                                                                                                           |                                                                                                                                        |                                                                                                                                                                                                                                                                                                                                                                                                                                                                                                                       |   |                |           |                                                 |            |                                                      |          |                        |   |              |   |          |   |             |   |          |   |         |    |                    |
| 0          | No                                                                                                                                                                           |                                                                                                                                        |                                                                                                                                                                                                                                                                                                                                                                                                                                                                                                                       |   |                |           |                                                 |            |                                                      |          |                        |   |              |   |          |   |             |   |          |   |         |    |                    |
| 26         | tabaco_personas_cant<br>Mostrar el archivo SÓLO si:<br>[tabaco_explicito]='1'                                                                                                | 22.- ¿Cuántas personas o personajes usan tabaco explícitamente en este minuto?<br><i>SI SON TRES O MÁS ELIJA A LOS DOS PRINCIPALES</i> | radio<br><table border="1"> <tr><td>1</td><td>1</td></tr> <tr><td>2</td><td>2 o más</td></tr> </table>                                                                                                                                                                                                                                                                                                                                                                                                                | 1 | 1              | 2         | 2 o más                                         |            |                                                      |          |                        |   |              |   |          |   |             |   |          |   |         |    |                    |
| 1          | 1                                                                                                                                                                            |                                                                                                                                        |                                                                                                                                                                                                                                                                                                                                                                                                                                                                                                                       |   |                |           |                                                 |            |                                                      |          |                        |   |              |   |          |   |             |   |          |   |         |    |                    |
| 2          | 2 o más                                                                                                                                                                      |                                                                                                                                        |                                                                                                                                                                                                                                                                                                                                                                                                                                                                                                                       |   |                |           |                                                 |            |                                                      |          |                        |   |              |   |          |   |             |   |          |   |         |    |                    |
| 27         | txt_personaje_1<br>Mostrar el archivo SÓLO si:<br>[tabaco_personas_cant]='1' or [tabaco_personas_cant]='2'                                                                   | Personaje 1                                                                                                                            | descriptive                                                                                                                                                                                                                                                                                                                                                                                                                                                                                                           |   |                |           |                                                 |            |                                                      |          |                        |   |              |   |          |   |             |   |          |   |         |    |                    |
| 28         | nombre_personaje<br>Mostrar el archivo SÓLO si:<br>[tabaco_personas_cant]='1' or [tabaco_personas_cant]='2'                                                                  | 23.- ¿Cómo se llama el personaje? (debe responder esta pregunta CON mayúsculas, sin tilde y sin símbolos).                             | text                                                                                                                                                                                                                                                                                                                                                                                                                                                                                                                  |   |                |           |                                                 |            |                                                      |          |                        |   |              |   |          |   |             |   |          |   |         |    |                    |

23/10/2020

FONIS TABACO V2.0 | REDCap

|    |                                                                                                                                                        |                                                                                      |                                                                                                                                                                                                                                                                                                                                                                                                                                                                                                                                                                                                                                                                                                       |   |                                       |   |                                  |   |                                  |   |                                          |   |                                                        |    |                                |   |                           |   |                                                  |   |                                         |    |                        |
|----|--------------------------------------------------------------------------------------------------------------------------------------------------------|--------------------------------------------------------------------------------------|-------------------------------------------------------------------------------------------------------------------------------------------------------------------------------------------------------------------------------------------------------------------------------------------------------------------------------------------------------------------------------------------------------------------------------------------------------------------------------------------------------------------------------------------------------------------------------------------------------------------------------------------------------------------------------------------------------|---|---------------------------------------|---|----------------------------------|---|----------------------------------|---|------------------------------------------|---|--------------------------------------------------------|----|--------------------------------|---|---------------------------|---|--------------------------------------------------|---|-----------------------------------------|----|------------------------|
| 29 | tabaco_tipo_p1<br>Mostrar el archivo SÓLO si:<br>[tabaco_personas_cant]='1' or<br>[tabaco_personas_cant]='2'                                           | 24.- ¿Qué tipo de tabaco usa la persona o personaje en pantalla durante este minuto? | radio<br><table border="1"> <tr><td>1</td><td>Cigarrillo</td></tr> <tr><td>2</td><td>Cigarro-puro</td></tr> <tr><td>3</td><td>Pipa</td></tr> <tr><td>4</td><td>Pipa de agua</td></tr> <tr><td>5</td><td>Vaporizador</td></tr> <tr><td>99</td><td>Otro producto de tabaco</td></tr> </table>                                                                                                                                                                                                                                                                                                                                                                                                           | 1 | Cigarrillo                            | 2 | Cigarro-puro                     | 3 | Pipa                             | 4 | Pipa de agua                             | 5 | Vaporizador                                            | 99 | Otro producto de tabaco        |   |                           |   |                                                  |   |                                         |    |                        |
| 1  | Cigarrillo                                                                                                                                             |                                                                                      |                                                                                                                                                                                                                                                                                                                                                                                                                                                                                                                                                                                                                                                                                                       |   |                                       |   |                                  |   |                                  |   |                                          |   |                                                        |    |                                |   |                           |   |                                                  |   |                                         |    |                        |
| 2  | Cigarro-puro                                                                                                                                           |                                                                                      |                                                                                                                                                                                                                                                                                                                                                                                                                                                                                                                                                                                                                                                                                                       |   |                                       |   |                                  |   |                                  |   |                                          |   |                                                        |    |                                |   |                           |   |                                                  |   |                                         |    |                        |
| 3  | Pipa                                                                                                                                                   |                                                                                      |                                                                                                                                                                                                                                                                                                                                                                                                                                                                                                                                                                                                                                                                                                       |   |                                       |   |                                  |   |                                  |   |                                          |   |                                                        |    |                                |   |                           |   |                                                  |   |                                         |    |                        |
| 4  | Pipa de agua                                                                                                                                           |                                                                                      |                                                                                                                                                                                                                                                                                                                                                                                                                                                                                                                                                                                                                                                                                                       |   |                                       |   |                                  |   |                                  |   |                                          |   |                                                        |    |                                |   |                           |   |                                                  |   |                                         |    |                        |
| 5  | Vaporizador                                                                                                                                            |                                                                                      |                                                                                                                                                                                                                                                                                                                                                                                                                                                                                                                                                                                                                                                                                                       |   |                                       |   |                                  |   |                                  |   |                                          |   |                                                        |    |                                |   |                           |   |                                                  |   |                                         |    |                        |
| 99 | Otro producto de tabaco                                                                                                                                |                                                                                      |                                                                                                                                                                                                                                                                                                                                                                                                                                                                                                                                                                                                                                                                                                       |   |                                       |   |                                  |   |                                  |   |                                          |   |                                                        |    |                                |   |                           |   |                                                  |   |                                         |    |                        |
| 30 | papel_p1<br>Mostrar el archivo SÓLO si:<br>[tabaco_personas_cant]='1' or<br>[tabaco_personas_cant]='2'                                                 | 25.- ¿Qué papel tiene el personaje en la trama?                                      | radio<br><table border="1"> <tr><td>1</td><td>Principal</td></tr> <tr><td>2</td><td>Secundario</td></tr> <tr><td>3</td><td>Terciario o extra</td></tr> <tr><td>4</td><td>No se puede determinar</td></tr> </table>                                                                                                                                                                                                                                                                                                                                                                                                                                                                                    | 1 | Principal                             | 2 | Secundario                       | 3 | Terciario o extra                | 4 | No se puede determinar                   |   |                                                        |    |                                |   |                           |   |                                                  |   |                                         |    |                        |
| 1  | Principal                                                                                                                                              |                                                                                      |                                                                                                                                                                                                                                                                                                                                                                                                                                                                                                                                                                                                                                                                                                       |   |                                       |   |                                  |   |                                  |   |                                          |   |                                                        |    |                                |   |                           |   |                                                  |   |                                         |    |                        |
| 2  | Secundario                                                                                                                                             |                                                                                      |                                                                                                                                                                                                                                                                                                                                                                                                                                                                                                                                                                                                                                                                                                       |   |                                       |   |                                  |   |                                  |   |                                          |   |                                                        |    |                                |   |                           |   |                                                  |   |                                         |    |                        |
| 3  | Terciario o extra                                                                                                                                      |                                                                                      |                                                                                                                                                                                                                                                                                                                                                                                                                                                                                                                                                                                                                                                                                                       |   |                                       |   |                                  |   |                                  |   |                                          |   |                                                        |    |                                |   |                           |   |                                                  |   |                                         |    |                        |
| 4  | No se puede determinar                                                                                                                                 |                                                                                      |                                                                                                                                                                                                                                                                                                                                                                                                                                                                                                                                                                                                                                                                                                       |   |                                       |   |                                  |   |                                  |   |                                          |   |                                                        |    |                                |   |                           |   |                                                  |   |                                         |    |                        |
| 31 | edad_p1<br>Mostrar el archivo SÓLO si:<br>[tabaco_personas_cant]='1' or<br>[tabaco_personas_cant]='2'                                                  | 26.- ¿Qué edad parece tener el personaje?                                            | radio<br><table border="1"> <tr><td>1</td><td>Menor de edad &gt;18</td></tr> <tr><td>2</td><td>Adulto joven 18-39</td></tr> <tr><td>3</td><td>Adulto maduro 40-64</td></tr> <tr><td>4</td><td>Adulto mayor 65+</td></tr> <tr><td>5</td><td>No se puede determinar</td></tr> </table>                                                                                                                                                                                                                                                                                                                                                                                                                  | 1 | Menor de edad >18                     | 2 | Adulto joven 18-39               | 3 | Adulto maduro 40-64              | 4 | Adulto mayor 65+                         | 5 | No se puede determinar                                 |    |                                |   |                           |   |                                                  |   |                                         |    |                        |
| 1  | Menor de edad >18                                                                                                                                      |                                                                                      |                                                                                                                                                                                                                                                                                                                                                                                                                                                                                                                                                                                                                                                                                                       |   |                                       |   |                                  |   |                                  |   |                                          |   |                                                        |    |                                |   |                           |   |                                                  |   |                                         |    |                        |
| 2  | Adulto joven 18-39                                                                                                                                     |                                                                                      |                                                                                                                                                                                                                                                                                                                                                                                                                                                                                                                                                                                                                                                                                                       |   |                                       |   |                                  |   |                                  |   |                                          |   |                                                        |    |                                |   |                           |   |                                                  |   |                                         |    |                        |
| 3  | Adulto maduro 40-64                                                                                                                                    |                                                                                      |                                                                                                                                                                                                                                                                                                                                                                                                                                                                                                                                                                                                                                                                                                       |   |                                       |   |                                  |   |                                  |   |                                          |   |                                                        |    |                                |   |                           |   |                                                  |   |                                         |    |                        |
| 4  | Adulto mayor 65+                                                                                                                                       |                                                                                      |                                                                                                                                                                                                                                                                                                                                                                                                                                                                                                                                                                                                                                                                                                       |   |                                       |   |                                  |   |                                  |   |                                          |   |                                                        |    |                                |   |                           |   |                                                  |   |                                         |    |                        |
| 5  | No se puede determinar                                                                                                                                 |                                                                                      |                                                                                                                                                                                                                                                                                                                                                                                                                                                                                                                                                                                                                                                                                                       |   |                                       |   |                                  |   |                                  |   |                                          |   |                                                        |    |                                |   |                           |   |                                                  |   |                                         |    |                        |
| 32 | sexo_biologico_p1<br>Mostrar el archivo SÓLO si:<br>[tabaco_personas_cant]='1' or<br>[tabaco_personas_cant]='2'                                        | 27.- ¿Qué sexo biológico parecer tener el personaje?                                 | radio<br><table border="1"> <tr><td>1</td><td>Hombre</td></tr> <tr><td>2</td><td>Mujer</td></tr> <tr><td>3</td><td>No se puede determinar</td></tr> </table>                                                                                                                                                                                                                                                                                                                                                                                                                                                                                                                                          | 1 | Hombre                                | 2 | Mujer                            | 3 | No se puede determinar           |   |                                          |   |                                                        |    |                                |   |                           |   |                                                  |   |                                         |    |                        |
| 1  | Hombre                                                                                                                                                 |                                                                                      |                                                                                                                                                                                                                                                                                                                                                                                                                                                                                                                                                                                                                                                                                                       |   |                                       |   |                                  |   |                                  |   |                                          |   |                                                        |    |                                |   |                           |   |                                                  |   |                                         |    |                        |
| 2  | Mujer                                                                                                                                                  |                                                                                      |                                                                                                                                                                                                                                                                                                                                                                                                                                                                                                                                                                                                                                                                                                       |   |                                       |   |                                  |   |                                  |   |                                          |   |                                                        |    |                                |   |                           |   |                                                  |   |                                         |    |                        |
| 3  | No se puede determinar                                                                                                                                 |                                                                                      |                                                                                                                                                                                                                                                                                                                                                                                                                                                                                                                                                                                                                                                                                                       |   |                                       |   |                                  |   |                                  |   |                                          |   |                                                        |    |                                |   |                           |   |                                                  |   |                                         |    |                        |
| 33 | uso_contexto_fisico_p1<br>Mostrar el archivo SÓLO si:<br>[tabaco_personas_cant]='1' or<br>[tabaco_personas_cant]='2'                                   | 28.- ¿En qué ambiente físico usa tabaco el personaje en este minuto?                 | radio<br><table border="1"> <tr><td>1</td><td>En ambiente cerrado</td></tr> <tr><td>2</td><td>En ambiente semiabierto</td></tr> <tr><td>3</td><td>En ambiente abierto</td></tr> <tr><td>4</td><td>No se puede determinar</td></tr> </table>                                                                                                                                                                                                                                                                                                                                                                                                                                                           | 1 | En ambiente cerrado                   | 2 | En ambiente semiabierto          | 3 | En ambiente abierto              | 4 | No se puede determinar                   |   |                                                        |    |                                |   |                           |   |                                                  |   |                                         |    |                        |
| 1  | En ambiente cerrado                                                                                                                                    |                                                                                      |                                                                                                                                                                                                                                                                                                                                                                                                                                                                                                                                                                                                                                                                                                       |   |                                       |   |                                  |   |                                  |   |                                          |   |                                                        |    |                                |   |                           |   |                                                  |   |                                         |    |                        |
| 2  | En ambiente semiabierto                                                                                                                                |                                                                                      |                                                                                                                                                                                                                                                                                                                                                                                                                                                                                                                                                                                                                                                                                                       |   |                                       |   |                                  |   |                                  |   |                                          |   |                                                        |    |                                |   |                           |   |                                                  |   |                                         |    |                        |
| 3  | En ambiente abierto                                                                                                                                    |                                                                                      |                                                                                                                                                                                                                                                                                                                                                                                                                                                                                                                                                                                                                                                                                                       |   |                                       |   |                                  |   |                                  |   |                                          |   |                                                        |    |                                |   |                           |   |                                                  |   |                                         |    |                        |
| 4  | No se puede determinar                                                                                                                                 |                                                                                      |                                                                                                                                                                                                                                                                                                                                                                                                                                                                                                                                                                                                                                                                                                       |   |                                       |   |                                  |   |                                  |   |                                          |   |                                                        |    |                                |   |                           |   |                                                  |   |                                         |    |                        |
| 34 | tipo_local<br>Mostrar el archivo SÓLO si:<br>[uso_contexto_fisico_p1]<>'3'<br>and ([tabaco_personas_cant]<br>='1' or [tabaco_personas_cant]<br>t]='2') | 29.- ¿En qué tipo de local usa tabaco el personaje en este minuto?                   | radio<br><table border="1"> <tr><td>1</td><td>En un hogar</td></tr> <tr><td>2</td><td>En un hotel o residencia</td></tr> <tr><td>3</td><td>En un bar, restaurante o similar</td></tr> <tr><td>4</td><td>En un establecimiento educativo superior</td></tr> <tr><td>5</td><td>En un establecimiento educativo de básica o secundaria</td></tr> <tr><td>6</td><td>En un establecimiento de salud</td></tr> <tr><td>7</td><td>En un medio de transporte</td></tr> <tr><td>8</td><td>En un lugar de trabajo no incluido anteriormente</td></tr> <tr><td>9</td><td>En otro lugar no incluido anteriormente</td></tr> <tr><td>10</td><td>No se puede determinar</td></tr> </table> alineación de encargo LV | 1 | En un hogar                           | 2 | En un hotel o residencia         | 3 | En un bar, restaurante o similar | 4 | En un establecimiento educativo superior | 5 | En un establecimiento educativo de básica o secundaria | 6  | En un establecimiento de salud | 7 | En un medio de transporte | 8 | En un lugar de trabajo no incluido anteriormente | 9 | En otro lugar no incluido anteriormente | 10 | No se puede determinar |
| 1  | En un hogar                                                                                                                                            |                                                                                      |                                                                                                                                                                                                                                                                                                                                                                                                                                                                                                                                                                                                                                                                                                       |   |                                       |   |                                  |   |                                  |   |                                          |   |                                                        |    |                                |   |                           |   |                                                  |   |                                         |    |                        |
| 2  | En un hotel o residencia                                                                                                                               |                                                                                      |                                                                                                                                                                                                                                                                                                                                                                                                                                                                                                                                                                                                                                                                                                       |   |                                       |   |                                  |   |                                  |   |                                          |   |                                                        |    |                                |   |                           |   |                                                  |   |                                         |    |                        |
| 3  | En un bar, restaurante o similar                                                                                                                       |                                                                                      |                                                                                                                                                                                                                                                                                                                                                                                                                                                                                                                                                                                                                                                                                                       |   |                                       |   |                                  |   |                                  |   |                                          |   |                                                        |    |                                |   |                           |   |                                                  |   |                                         |    |                        |
| 4  | En un establecimiento educativo superior                                                                                                               |                                                                                      |                                                                                                                                                                                                                                                                                                                                                                                                                                                                                                                                                                                                                                                                                                       |   |                                       |   |                                  |   |                                  |   |                                          |   |                                                        |    |                                |   |                           |   |                                                  |   |                                         |    |                        |
| 5  | En un establecimiento educativo de básica o secundaria                                                                                                 |                                                                                      |                                                                                                                                                                                                                                                                                                                                                                                                                                                                                                                                                                                                                                                                                                       |   |                                       |   |                                  |   |                                  |   |                                          |   |                                                        |    |                                |   |                           |   |                                                  |   |                                         |    |                        |
| 6  | En un establecimiento de salud                                                                                                                         |                                                                                      |                                                                                                                                                                                                                                                                                                                                                                                                                                                                                                                                                                                                                                                                                                       |   |                                       |   |                                  |   |                                  |   |                                          |   |                                                        |    |                                |   |                           |   |                                                  |   |                                         |    |                        |
| 7  | En un medio de transporte                                                                                                                              |                                                                                      |                                                                                                                                                                                                                                                                                                                                                                                                                                                                                                                                                                                                                                                                                                       |   |                                       |   |                                  |   |                                  |   |                                          |   |                                                        |    |                                |   |                           |   |                                                  |   |                                         |    |                        |
| 8  | En un lugar de trabajo no incluido anteriormente                                                                                                       |                                                                                      |                                                                                                                                                                                                                                                                                                                                                                                                                                                                                                                                                                                                                                                                                                       |   |                                       |   |                                  |   |                                  |   |                                          |   |                                                        |    |                                |   |                           |   |                                                  |   |                                         |    |                        |
| 9  | En otro lugar no incluido anteriormente                                                                                                                |                                                                                      |                                                                                                                                                                                                                                                                                                                                                                                                                                                                                                                                                                                                                                                                                                       |   |                                       |   |                                  |   |                                  |   |                                          |   |                                                        |    |                                |   |                           |   |                                                  |   |                                         |    |                        |
| 10 | No se puede determinar                                                                                                                                 |                                                                                      |                                                                                                                                                                                                                                                                                                                                                                                                                                                                                                                                                                                                                                                                                                       |   |                                       |   |                                  |   |                                  |   |                                          |   |                                                        |    |                                |   |                           |   |                                                  |   |                                         |    |                        |
| 35 | tabaco_solo_o<br>Mostrar el archivo SÓLO si:<br>[tabaco_personas_cant]='1' or<br>[tabaco_personas_cant]='2'                                            | 30.- En este minuto ¿El personaje usa tabaco en presencia de otros?                  | radio<br><table border="1"> <tr><td>1</td><td>Sí, en presencia de uno o más menores</td></tr> <tr><td>2</td><td>Sí, en presencia sólo de adultos</td></tr> <tr><td>0</td><td>No</td></tr> <tr><td>4</td><td>No se puede determinar</td></tr> </table> alineación de encargo LV                                                                                                                                                                                                                                                                                                                                                                                                                        | 1 | Sí, en presencia de uno o más menores | 2 | Sí, en presencia sólo de adultos | 0 | No                               | 4 | No se puede determinar                   |   |                                                        |    |                                |   |                           |   |                                                  |   |                                         |    |                        |
| 1  | Sí, en presencia de uno o más menores                                                                                                                  |                                                                                      |                                                                                                                                                                                                                                                                                                                                                                                                                                                                                                                                                                                                                                                                                                       |   |                                       |   |                                  |   |                                  |   |                                          |   |                                                        |    |                                |   |                           |   |                                                  |   |                                         |    |                        |
| 2  | Sí, en presencia sólo de adultos                                                                                                                       |                                                                                      |                                                                                                                                                                                                                                                                                                                                                                                                                                                                                                                                                                                                                                                                                                       |   |                                       |   |                                  |   |                                  |   |                                          |   |                                                        |    |                                |   |                           |   |                                                  |   |                                         |    |                        |
| 0  | No                                                                                                                                                     |                                                                                      |                                                                                                                                                                                                                                                                                                                                                                                                                                                                                                                                                                                                                                                                                                       |   |                                       |   |                                  |   |                                  |   |                                          |   |                                                        |    |                                |   |                           |   |                                                  |   |                                         |    |                        |
| 4  | No se puede determinar                                                                                                                                 |                                                                                      |                                                                                                                                                                                                                                                                                                                                                                                                                                                                                                                                                                                                                                                                                                       |   |                                       |   |                                  |   |                                  |   |                                          |   |                                                        |    |                                |   |                           |   |                                                  |   |                                         |    |                        |

23/10/2020

FONIS TABACO V2.0 | REDCap

|    |                                                                                                             |                                                                                                                                                                                                                                                            |                                                                                                                                                                                                                                                                                                                                                                                                                                                                                                                                                                                                                                                                             |
|----|-------------------------------------------------------------------------------------------------------------|------------------------------------------------------------------------------------------------------------------------------------------------------------------------------------------------------------------------------------------------------------|-----------------------------------------------------------------------------------------------------------------------------------------------------------------------------------------------------------------------------------------------------------------------------------------------------------------------------------------------------------------------------------------------------------------------------------------------------------------------------------------------------------------------------------------------------------------------------------------------------------------------------------------------------------------------------|
| 36 | no_fumadores_p1<br>Mostrar el archivo SÓLO si:<br>[tabaco_personas_cant]='2'                                | 31.- ¿Fuman todos los presentes?                                                                                                                                                                                                                           | yesno<br>1 Si<br>0 No                                                                                                                                                                                                                                                                                                                                                                                                                                                                                                                                                                                                                                                       |
| 37 | tabaco_motivo<br>Mostrar el archivo SÓLO si:<br>[tabaco_personas_cant]='1' or<br>[tabaco_personas_cant]='2' | 32.- Por lo que ha visto u oído hasta este minuto en este programa ¿Cuál cree que es él o los motivos principales por el que personaje usa o justifica el uso de tabaco? (Seleccione máximo dos alternativas)<br><i>Seleccione máximo dos alternativas</i> | checkbox<br>1 tabaco_motivo__1 como cuestionamiento o rebeldía frente a las instituciones sociales<br>2 tabaco_motivo__2 como mecanismo para socializar o intercambiar experiencias entre pares<br>3 tabaco_motivo__3 porque muchos lo hacen o lo hacían en su entorno familiar o de amistades<br>4 tabaco_motivo__4 para proyectar una imagen ideal, glamour, encanto, éxito, o poder o para identificarse con personas o personajes que admira<br>5 tabaco_motivo__5 como signo de madurez e independencia<br>6 tabaco_motivo__6 para obtener placer, divertirse, o para hacer frente al estrés.<br>7 tabaco_motivo__7 No se puede determinar<br>alineación de encargo LV |
| 38 | torpedo_2                                                                                                   | TORPEDO: REALIZAR LOS CAMBIOS AL PERSONAJE 2                                                                                                                                                                                                               | radio<br>alineación de encargo LV<br>Field Annotation: @HIDDEN                                                                                                                                                                                                                                                                                                                                                                                                                                                                                                                                                                                                              |
| 39 | txt_personaje_2<br>Mostrar el archivo SÓLO si:<br>[tabaco_personas_cant]='2'                                | Personaje 2                                                                                                                                                                                                                                                | descriptive                                                                                                                                                                                                                                                                                                                                                                                                                                                                                                                                                                                                                                                                 |
| 40 | nombre_personaje_2<br>Mostrar el archivo SÓLO si:<br>[tabaco_personas_cant]='2'                             | 33.- ¿Cómo se llama el personaje?, (debe responder esta pregunta CON mayúsculas, sin tilde y sin símbolos).                                                                                                                                                | text                                                                                                                                                                                                                                                                                                                                                                                                                                                                                                                                                                                                                                                                        |
| 41 | tabaco_tipo_p2<br>Mostrar el archivo SÓLO si:<br>[tabaco_personas_cant]='2'                                 | 34.- ¿Qué tipo de tabaco usa la persona o personaje en pantalla durante este minuto?                                                                                                                                                                       | radio<br>1 Cigarrillo<br>2 Cigarro-puro<br>3 Pipa<br>4 Pipa de agua<br>5 Vaporizador<br>99 Otro producto de tabaco                                                                                                                                                                                                                                                                                                                                                                                                                                                                                                                                                          |
| 42 | papel_p2<br>Mostrar el archivo SÓLO si:<br>[tabaco_personas_cant]='2'                                       | 35.- ¿Qué papel tiene el personaje en la trama?                                                                                                                                                                                                            | radio<br>1 Principal<br>2 Secundario<br>3 Terciario o extra<br>4 No se puede determinar                                                                                                                                                                                                                                                                                                                                                                                                                                                                                                                                                                                     |
| 43 | edad_p2<br>Mostrar el archivo SÓLO si:<br>[tabaco_personas_cant]='2'                                        | 36.- ¿Qué edad parece tener el personaje?                                                                                                                                                                                                                  | radio<br>1 Menor de edad >18<br>2 Adulto joven 18-39<br>3 Adulto maduro 40-64<br>4 Adulto mayor 65+<br>5 No se puede determinar                                                                                                                                                                                                                                                                                                                                                                                                                                                                                                                                             |

23/10/2020

FONIS TABACO V2.0 | REDCap

|    |                                                                                                                 |                                                                      |                                                                                                                                                                                                                                                                                                                                                                                                                                                                                                                                                                                                                                                                                                          |   |                                       |   |                                  |   |                                  |   |                                          |   |                                                        |   |                                |   |                           |   |                                                  |   |                                         |    |                        |
|----|-----------------------------------------------------------------------------------------------------------------|----------------------------------------------------------------------|----------------------------------------------------------------------------------------------------------------------------------------------------------------------------------------------------------------------------------------------------------------------------------------------------------------------------------------------------------------------------------------------------------------------------------------------------------------------------------------------------------------------------------------------------------------------------------------------------------------------------------------------------------------------------------------------------------|---|---------------------------------------|---|----------------------------------|---|----------------------------------|---|------------------------------------------|---|--------------------------------------------------------|---|--------------------------------|---|---------------------------|---|--------------------------------------------------|---|-----------------------------------------|----|------------------------|
| 44 | sexo_biologico_p2<br>Mostrar el archivo SÓLO si:<br>[tabaco_personas_cant]='2'                                  | 37.- ¿Qué sexo biológico parecer tener el personaje?                 | radio<br><table border="1"> <tr><td>1</td><td>Hombre</td></tr> <tr><td>2</td><td>Mujer</td></tr> <tr><td>3</td><td>No se puede determinar</td></tr> </table>                                                                                                                                                                                                                                                                                                                                                                                                                                                                                                                                             | 1 | Hombre                                | 2 | Mujer                            | 3 | No se puede determinar           |   |                                          |   |                                                        |   |                                |   |                           |   |                                                  |   |                                         |    |                        |
| 1  | Hombre                                                                                                          |                                                                      |                                                                                                                                                                                                                                                                                                                                                                                                                                                                                                                                                                                                                                                                                                          |   |                                       |   |                                  |   |                                  |   |                                          |   |                                                        |   |                                |   |                           |   |                                                  |   |                                         |    |                        |
| 2  | Mujer                                                                                                           |                                                                      |                                                                                                                                                                                                                                                                                                                                                                                                                                                                                                                                                                                                                                                                                                          |   |                                       |   |                                  |   |                                  |   |                                          |   |                                                        |   |                                |   |                           |   |                                                  |   |                                         |    |                        |
| 3  | No se puede determinar                                                                                          |                                                                      |                                                                                                                                                                                                                                                                                                                                                                                                                                                                                                                                                                                                                                                                                                          |   |                                       |   |                                  |   |                                  |   |                                          |   |                                                        |   |                                |   |                           |   |                                                  |   |                                         |    |                        |
| 45 | uso_contexto_fisico_p2<br>Mostrar el archivo SÓLO si:<br>[tabaco_personas_cant]='2'                             | 38.- ¿En qué ambiente físico usa tabaco el personaje en este minuto? | radio<br><table border="1"> <tr><td>1</td><td>En ambiente cerrado</td></tr> <tr><td>2</td><td>En ambiente semiabierto</td></tr> <tr><td>3</td><td>En ambiente abierto</td></tr> <tr><td>4</td><td>No se puede determinar</td></tr> </table>                                                                                                                                                                                                                                                                                                                                                                                                                                                              | 1 | En ambiente cerrado                   | 2 | En ambiente semiabierto          | 3 | En ambiente abierto              | 4 | No se puede determinar                   |   |                                                        |   |                                |   |                           |   |                                                  |   |                                         |    |                        |
| 1  | En ambiente cerrado                                                                                             |                                                                      |                                                                                                                                                                                                                                                                                                                                                                                                                                                                                                                                                                                                                                                                                                          |   |                                       |   |                                  |   |                                  |   |                                          |   |                                                        |   |                                |   |                           |   |                                                  |   |                                         |    |                        |
| 2  | En ambiente semiabierto                                                                                         |                                                                      |                                                                                                                                                                                                                                                                                                                                                                                                                                                                                                                                                                                                                                                                                                          |   |                                       |   |                                  |   |                                  |   |                                          |   |                                                        |   |                                |   |                           |   |                                                  |   |                                         |    |                        |
| 3  | En ambiente abierto                                                                                             |                                                                      |                                                                                                                                                                                                                                                                                                                                                                                                                                                                                                                                                                                                                                                                                                          |   |                                       |   |                                  |   |                                  |   |                                          |   |                                                        |   |                                |   |                           |   |                                                  |   |                                         |    |                        |
| 4  | No se puede determinar                                                                                          |                                                                      |                                                                                                                                                                                                                                                                                                                                                                                                                                                                                                                                                                                                                                                                                                          |   |                                       |   |                                  |   |                                  |   |                                          |   |                                                        |   |                                |   |                           |   |                                                  |   |                                         |    |                        |
| 46 | tipo_local_p2<br>Mostrar el archivo SÓLO si:<br>[uso_contexto_fisico_p2]<>'3'<br>and [tabaco_personas_cant]='2' | 39.- ¿En qué tipo de local usa tabaco el personaje en este minuto?   | radio<br><table border="1"> <tr><td>1</td><td>En un hogar</td></tr> <tr><td>2</td><td>En un hotel o residencia</td></tr> <tr><td>3</td><td>En un bar, restaurante o similar</td></tr> <tr><td>4</td><td>En un establecimiento educativo superior</td></tr> <tr><td>5</td><td>En un establecimiento educativo de básica o secundaria</td></tr> <tr><td>6</td><td>En un establecimiento de salud</td></tr> <tr><td>7</td><td>En un medio de transporte</td></tr> <tr><td>8</td><td>En un lugar de trabajo no incluido anteriormente</td></tr> <tr><td>9</td><td>En otro lugar no incluido anteriormente</td></tr> <tr><td>10</td><td>No se puede determinar</td></tr> </table><br>alineación de encargo LV | 1 | En un hogar                           | 2 | En un hotel o residencia         | 3 | En un bar, restaurante o similar | 4 | En un establecimiento educativo superior | 5 | En un establecimiento educativo de básica o secundaria | 6 | En un establecimiento de salud | 7 | En un medio de transporte | 8 | En un lugar de trabajo no incluido anteriormente | 9 | En otro lugar no incluido anteriormente | 10 | No se puede determinar |
| 1  | En un hogar                                                                                                     |                                                                      |                                                                                                                                                                                                                                                                                                                                                                                                                                                                                                                                                                                                                                                                                                          |   |                                       |   |                                  |   |                                  |   |                                          |   |                                                        |   |                                |   |                           |   |                                                  |   |                                         |    |                        |
| 2  | En un hotel o residencia                                                                                        |                                                                      |                                                                                                                                                                                                                                                                                                                                                                                                                                                                                                                                                                                                                                                                                                          |   |                                       |   |                                  |   |                                  |   |                                          |   |                                                        |   |                                |   |                           |   |                                                  |   |                                         |    |                        |
| 3  | En un bar, restaurante o similar                                                                                |                                                                      |                                                                                                                                                                                                                                                                                                                                                                                                                                                                                                                                                                                                                                                                                                          |   |                                       |   |                                  |   |                                  |   |                                          |   |                                                        |   |                                |   |                           |   |                                                  |   |                                         |    |                        |
| 4  | En un establecimiento educativo superior                                                                        |                                                                      |                                                                                                                                                                                                                                                                                                                                                                                                                                                                                                                                                                                                                                                                                                          |   |                                       |   |                                  |   |                                  |   |                                          |   |                                                        |   |                                |   |                           |   |                                                  |   |                                         |    |                        |
| 5  | En un establecimiento educativo de básica o secundaria                                                          |                                                                      |                                                                                                                                                                                                                                                                                                                                                                                                                                                                                                                                                                                                                                                                                                          |   |                                       |   |                                  |   |                                  |   |                                          |   |                                                        |   |                                |   |                           |   |                                                  |   |                                         |    |                        |
| 6  | En un establecimiento de salud                                                                                  |                                                                      |                                                                                                                                                                                                                                                                                                                                                                                                                                                                                                                                                                                                                                                                                                          |   |                                       |   |                                  |   |                                  |   |                                          |   |                                                        |   |                                |   |                           |   |                                                  |   |                                         |    |                        |
| 7  | En un medio de transporte                                                                                       |                                                                      |                                                                                                                                                                                                                                                                                                                                                                                                                                                                                                                                                                                                                                                                                                          |   |                                       |   |                                  |   |                                  |   |                                          |   |                                                        |   |                                |   |                           |   |                                                  |   |                                         |    |                        |
| 8  | En un lugar de trabajo no incluido anteriormente                                                                |                                                                      |                                                                                                                                                                                                                                                                                                                                                                                                                                                                                                                                                                                                                                                                                                          |   |                                       |   |                                  |   |                                  |   |                                          |   |                                                        |   |                                |   |                           |   |                                                  |   |                                         |    |                        |
| 9  | En otro lugar no incluido anteriormente                                                                         |                                                                      |                                                                                                                                                                                                                                                                                                                                                                                                                                                                                                                                                                                                                                                                                                          |   |                                       |   |                                  |   |                                  |   |                                          |   |                                                        |   |                                |   |                           |   |                                                  |   |                                         |    |                        |
| 10 | No se puede determinar                                                                                          |                                                                      |                                                                                                                                                                                                                                                                                                                                                                                                                                                                                                                                                                                                                                                                                                          |   |                                       |   |                                  |   |                                  |   |                                          |   |                                                        |   |                                |   |                           |   |                                                  |   |                                         |    |                        |
| 47 | tabaco_solo_o_p2<br>Mostrar el archivo SÓLO si:<br>[tabaco_personas_cant]='2'                                   | 40.- En este minuto ¿El personaje usa tabaco en presencia de otros?  | radio<br><table border="1"> <tr><td>1</td><td>Sí, en presencia de uno o más menores</td></tr> <tr><td>2</td><td>Sí, en presencia sólo de adultos</td></tr> <tr><td>0</td><td>No</td></tr> <tr><td>4</td><td>No se puede determinar</td></tr> </table><br>alineación de encargo LV                                                                                                                                                                                                                                                                                                                                                                                                                        | 1 | Sí, en presencia de uno o más menores | 2 | Sí, en presencia sólo de adultos | 0 | No                               | 4 | No se puede determinar                   |   |                                                        |   |                                |   |                           |   |                                                  |   |                                         |    |                        |
| 1  | Sí, en presencia de uno o más menores                                                                           |                                                                      |                                                                                                                                                                                                                                                                                                                                                                                                                                                                                                                                                                                                                                                                                                          |   |                                       |   |                                  |   |                                  |   |                                          |   |                                                        |   |                                |   |                           |   |                                                  |   |                                         |    |                        |
| 2  | Sí, en presencia sólo de adultos                                                                                |                                                                      |                                                                                                                                                                                                                                                                                                                                                                                                                                                                                                                                                                                                                                                                                                          |   |                                       |   |                                  |   |                                  |   |                                          |   |                                                        |   |                                |   |                           |   |                                                  |   |                                         |    |                        |
| 0  | No                                                                                                              |                                                                      |                                                                                                                                                                                                                                                                                                                                                                                                                                                                                                                                                                                                                                                                                                          |   |                                       |   |                                  |   |                                  |   |                                          |   |                                                        |   |                                |   |                           |   |                                                  |   |                                         |    |                        |
| 4  | No se puede determinar                                                                                          |                                                                      |                                                                                                                                                                                                                                                                                                                                                                                                                                                                                                                                                                                                                                                                                                          |   |                                       |   |                                  |   |                                  |   |                                          |   |                                                        |   |                                |   |                           |   |                                                  |   |                                         |    |                        |
| 48 | no_fumadores_p2<br>Mostrar el archivo SÓLO si:<br>[tabaco_personas_cant]='2'                                    | 41.- ¿Hay al menos un acompañante que no fuma?                       | yesno<br><table border="1"> <tr><td>1</td><td>Sí</td></tr> <tr><td>0</td><td>No</td></tr> </table>                                                                                                                                                                                                                                                                                                                                                                                                                                                                                                                                                                                                       | 1 | Sí                                    | 0 | No                               |   |                                  |   |                                          |   |                                                        |   |                                |   |                           |   |                                                  |   |                                         |    |                        |
| 1  | Sí                                                                                                              |                                                                      |                                                                                                                                                                                                                                                                                                                                                                                                                                                                                                                                                                                                                                                                                                          |   |                                       |   |                                  |   |                                  |   |                                          |   |                                                        |   |                                |   |                           |   |                                                  |   |                                         |    |                        |
| 0  | No                                                                                                              |                                                                      |                                                                                                                                                                                                                                                                                                                                                                                                                                                                                                                                                                                                                                                                                                          |   |                                       |   |                                  |   |                                  |   |                                          |   |                                                        |   |                                |   |                           |   |                                                  |   |                                         |    |                        |

23/10/2020

FONIS TABACO V2.0 | REDCap

|    |                                                                                                                                                                                                                                                                                                                                                                                                                                                                                                                                                                                                                                                                                                                                                                                                                                                                                                                                                                                                         |                                                                                                                                                                 |                                                                                                                                                                                                                                                                                                                                                                                                                                                                                                                                                                                                                                                                                                                                                                                                                                                                                                                                                                            |   |                               |                                                                     |                                   |                    |                                                                        |   |                    |                                                                          |   |                    |                                                                                                                             |   |                    |                                       |   |                    |                                                                 |   |                    |                        |
|----|---------------------------------------------------------------------------------------------------------------------------------------------------------------------------------------------------------------------------------------------------------------------------------------------------------------------------------------------------------------------------------------------------------------------------------------------------------------------------------------------------------------------------------------------------------------------------------------------------------------------------------------------------------------------------------------------------------------------------------------------------------------------------------------------------------------------------------------------------------------------------------------------------------------------------------------------------------------------------------------------------------|-----------------------------------------------------------------------------------------------------------------------------------------------------------------|----------------------------------------------------------------------------------------------------------------------------------------------------------------------------------------------------------------------------------------------------------------------------------------------------------------------------------------------------------------------------------------------------------------------------------------------------------------------------------------------------------------------------------------------------------------------------------------------------------------------------------------------------------------------------------------------------------------------------------------------------------------------------------------------------------------------------------------------------------------------------------------------------------------------------------------------------------------------------|---|-------------------------------|---------------------------------------------------------------------|-----------------------------------|--------------------|------------------------------------------------------------------------|---|--------------------|--------------------------------------------------------------------------|---|--------------------|-----------------------------------------------------------------------------------------------------------------------------|---|--------------------|---------------------------------------|---|--------------------|-----------------------------------------------------------------|---|--------------------|------------------------|
| 49 | tabaco_motivo_2<br><br>Mostrar el archivo SÓLO si:<br>[tabaco_personas_cant]='2'                                                                                                                                                                                                                                                                                                                                                                                                                                                                                                                                                                                                                                                                                                                                                                                                                                                                                                                        | 42.- Por lo que ha visto u oído hasta este minuto en este programa ¿Cuál cree que es el motivo principal por el que personaje usa o justifica el uso de tabaco? | checkbox<br><table border="1"> <tr> <td>1</td> <td>tabaco_motivo_2__1</td> <td>como cuestionamiento o rebeldía frente a las instituciones sociales</td> </tr> <tr> <td>2</td> <td>tabaco_motivo_2__2</td> <td>como mecanismo para socializar o intercambiar experiencias entre pares</td> </tr> <tr> <td>3</td> <td>tabaco_motivo_2__3</td> <td>porque muchos lo hacen o lo hacían en su entorno familiar o de amistades</td> </tr> <tr> <td>4</td> <td>tabaco_motivo_2__4</td> <td>para proyectar una imagen ideal, glamour, encanto, éxito, o poder o para identificarse con personas o personajes que admira</td> </tr> <tr> <td>5</td> <td>tabaco_motivo_2__5</td> <td>como signo de madurez e independencia</td> </tr> <tr> <td>6</td> <td>tabaco_motivo_2__6</td> <td>para obtener placer, divertirse, o para hacer frente al estrés.</td> </tr> <tr> <td>7</td> <td>tabaco_motivo_2__7</td> <td>No se puede determinar</td> </tr> </table> alineación de encargo LV | 1 | tabaco_motivo_2__1            | como cuestionamiento o rebeldía frente a las instituciones sociales | 2                                 | tabaco_motivo_2__2 | como mecanismo para socializar o intercambiar experiencias entre pares | 3 | tabaco_motivo_2__3 | porque muchos lo hacen o lo hacían en su entorno familiar o de amistades | 4 | tabaco_motivo_2__4 | para proyectar una imagen ideal, glamour, encanto, éxito, o poder o para identificarse con personas o personajes que admira | 5 | tabaco_motivo_2__5 | como signo de madurez e independencia | 6 | tabaco_motivo_2__6 | para obtener placer, divertirse, o para hacer frente al estrés. | 7 | tabaco_motivo_2__7 | No se puede determinar |
| 1  | tabaco_motivo_2__1                                                                                                                                                                                                                                                                                                                                                                                                                                                                                                                                                                                                                                                                                                                                                                                                                                                                                                                                                                                      | como cuestionamiento o rebeldía frente a las instituciones sociales                                                                                             |                                                                                                                                                                                                                                                                                                                                                                                                                                                                                                                                                                                                                                                                                                                                                                                                                                                                                                                                                                            |   |                               |                                                                     |                                   |                    |                                                                        |   |                    |                                                                          |   |                    |                                                                                                                             |   |                    |                                       |   |                    |                                                                 |   |                    |                        |
| 2  | tabaco_motivo_2__2                                                                                                                                                                                                                                                                                                                                                                                                                                                                                                                                                                                                                                                                                                                                                                                                                                                                                                                                                                                      | como mecanismo para socializar o intercambiar experiencias entre pares                                                                                          |                                                                                                                                                                                                                                                                                                                                                                                                                                                                                                                                                                                                                                                                                                                                                                                                                                                                                                                                                                            |   |                               |                                                                     |                                   |                    |                                                                        |   |                    |                                                                          |   |                    |                                                                                                                             |   |                    |                                       |   |                    |                                                                 |   |                    |                        |
| 3  | tabaco_motivo_2__3                                                                                                                                                                                                                                                                                                                                                                                                                                                                                                                                                                                                                                                                                                                                                                                                                                                                                                                                                                                      | porque muchos lo hacen o lo hacían en su entorno familiar o de amistades                                                                                        |                                                                                                                                                                                                                                                                                                                                                                                                                                                                                                                                                                                                                                                                                                                                                                                                                                                                                                                                                                            |   |                               |                                                                     |                                   |                    |                                                                        |   |                    |                                                                          |   |                    |                                                                                                                             |   |                    |                                       |   |                    |                                                                 |   |                    |                        |
| 4  | tabaco_motivo_2__4                                                                                                                                                                                                                                                                                                                                                                                                                                                                                                                                                                                                                                                                                                                                                                                                                                                                                                                                                                                      | para proyectar una imagen ideal, glamour, encanto, éxito, o poder o para identificarse con personas o personajes que admira                                     |                                                                                                                                                                                                                                                                                                                                                                                                                                                                                                                                                                                                                                                                                                                                                                                                                                                                                                                                                                            |   |                               |                                                                     |                                   |                    |                                                                        |   |                    |                                                                          |   |                    |                                                                                                                             |   |                    |                                       |   |                    |                                                                 |   |                    |                        |
| 5  | tabaco_motivo_2__5                                                                                                                                                                                                                                                                                                                                                                                                                                                                                                                                                                                                                                                                                                                                                                                                                                                                                                                                                                                      | como signo de madurez e independencia                                                                                                                           |                                                                                                                                                                                                                                                                                                                                                                                                                                                                                                                                                                                                                                                                                                                                                                                                                                                                                                                                                                            |   |                               |                                                                     |                                   |                    |                                                                        |   |                    |                                                                          |   |                    |                                                                                                                             |   |                    |                                       |   |                    |                                                                 |   |                    |                        |
| 6  | tabaco_motivo_2__6                                                                                                                                                                                                                                                                                                                                                                                                                                                                                                                                                                                                                                                                                                                                                                                                                                                                                                                                                                                      | para obtener placer, divertirse, o para hacer frente al estrés.                                                                                                 |                                                                                                                                                                                                                                                                                                                                                                                                                                                                                                                                                                                                                                                                                                                                                                                                                                                                                                                                                                            |   |                               |                                                                     |                                   |                    |                                                                        |   |                    |                                                                          |   |                    |                                                                                                                             |   |                    |                                       |   |                    |                                                                 |   |                    |                        |
| 7  | tabaco_motivo_2__7                                                                                                                                                                                                                                                                                                                                                                                                                                                                                                                                                                                                                                                                                                                                                                                                                                                                                                                                                                                      | No se puede determinar                                                                                                                                          |                                                                                                                                                                                                                                                                                                                                                                                                                                                                                                                                                                                                                                                                                                                                                                                                                                                                                                                                                                            |   |                               |                                                                     |                                   |                    |                                                                        |   |                    |                                                                          |   |                    |                                                                                                                             |   |                    |                                       |   |                    |                                                                 |   |                    |                        |
| 50 | torpedo                                                                                                                                                                                                                                                                                                                                                                                                                                                                                                                                                                                                                                                                                                                                                                                                                                                                                                                                                                                                 | TORPEDO:<br>ORDENAR NUMERACIÓN DE LAS PREGUNTAS IGUAL AL WORD, VER LA FORMA EN QUE SE GUARDE FECHA Y HORA DE ENVÍO DEL CUESTIONARIO                             | descriptive<br>Field Annotation: @HIDDEN                                                                                                                                                                                                                                                                                                                                                                                                                                                                                                                                                                                                                                                                                                                                                                                                                                                                                                                                   |   |                               |                                                                     |                                   |                    |                                                                        |   |                    |                                                                          |   |                    |                                                                                                                             |   |                    |                                       |   |                    |                                                                 |   |                    |                        |
| 51 | tabaco_escena_explicito<br><br>Mostrar el archivo SÓLO si:<br>([minuto]<>'0' and [respuesta_s_iguales]='0' and ([tabaco_explicito]='0' or [tabaco_motivo(1)]= '1' or [tabaco_motivo(2)]= '1' or [tabaco_motivo(3)]= '1' or [tabaco_motivo(4)]= '1' or [tabaco_motivo(5)]= '1' or [tabaco_motivo(6)]= '1' or [tabaco_motivo(7)]= '1' or [tabaco_motivo_2(1)]= '1' or [tabaco_motivo_2(2)]= '1' or [tabaco_motivo_2(3)]= '1' or [tabaco_motivo_2(4)]= '1' or [tabaco_motivo_2(5)]= '1' or [tabaco_motivo_2(6)]= '1' or [tabaco_motivo_2(7)]= '1']) or ([minuto]='0' and ([tabaco_explicito]='0' or [tabaco_motivo(1)]= '1' or [tabaco_motivo(2)]= '1' or [tabaco_motivo(3)]= '1' or [tabaco_motivo(4)]= '1' or [tabaco_motivo(5)]= '1' or [tabaco_motivo(6)]= '1' or [tabaco_motivo(7)]= '1' or [tabaco_motivo_2(1)]= '1' or [tabaco_motivo_2(2)]= '1' or [tabaco_motivo_2(3)]= '1' or [tabaco_motivo_2(4)]= '1' or [tabaco_motivo_2(5)]= '1' or [tabaco_motivo_2(6)]= '1' or [tabaco_motivo_2(7)]= '1']) | 43.- ¿Observa en este minuto el uso implícito de tabaco?                                                                                                        | radio<br><table border="1"> <tr> <td>1</td> <td>Sí, hay audio que implica uso</td> </tr> <tr> <td>2</td> <td>Sí, hay imágenes que implican uso</td> </tr> <tr> <td>3</td> <td>Las dos anteriores son ciertas</td> </tr> <tr> <td>4</td> <td>No</td> </tr> </table>                                                                                                                                                                                                                                                                                                                                                                                                                                                                                                                                                                                                                                                                                                         | 1 | Sí, hay audio que implica uso | 2                                                                   | Sí, hay imágenes que implican uso | 3                  | Las dos anteriores son ciertas                                         | 4 | No                 |                                                                          |   |                    |                                                                                                                             |   |                    |                                       |   |                    |                                                                 |   |                    |                        |
| 1  | Sí, hay audio que implica uso                                                                                                                                                                                                                                                                                                                                                                                                                                                                                                                                                                                                                                                                                                                                                                                                                                                                                                                                                                           |                                                                                                                                                                 |                                                                                                                                                                                                                                                                                                                                                                                                                                                                                                                                                                                                                                                                                                                                                                                                                                                                                                                                                                            |   |                               |                                                                     |                                   |                    |                                                                        |   |                    |                                                                          |   |                    |                                                                                                                             |   |                    |                                       |   |                    |                                                                 |   |                    |                        |
| 2  | Sí, hay imágenes que implican uso                                                                                                                                                                                                                                                                                                                                                                                                                                                                                                                                                                                                                                                                                                                                                                                                                                                                                                                                                                       |                                                                                                                                                                 |                                                                                                                                                                                                                                                                                                                                                                                                                                                                                                                                                                                                                                                                                                                                                                                                                                                                                                                                                                            |   |                               |                                                                     |                                   |                    |                                                                        |   |                    |                                                                          |   |                    |                                                                                                                             |   |                    |                                       |   |                    |                                                                 |   |                    |                        |
| 3  | Las dos anteriores son ciertas                                                                                                                                                                                                                                                                                                                                                                                                                                                                                                                                                                                                                                                                                                                                                                                                                                                                                                                                                                          |                                                                                                                                                                 |                                                                                                                                                                                                                                                                                                                                                                                                                                                                                                                                                                                                                                                                                                                                                                                                                                                                                                                                                                            |   |                               |                                                                     |                                   |                    |                                                                        |   |                    |                                                                          |   |                    |                                                                                                                             |   |                    |                                       |   |                    |                                                                 |   |                    |                        |
| 4  | No                                                                                                                                                                                                                                                                                                                                                                                                                                                                                                                                                                                                                                                                                                                                                                                                                                                                                                                                                                                                      |                                                                                                                                                                 |                                                                                                                                                                                                                                                                                                                                                                                                                                                                                                                                                                                                                                                                                                                                                                                                                                                                                                                                                                            |   |                               |                                                                     |                                   |                    |                                                                        |   |                    |                                                                          |   |                    |                                                                                                                             |   |                    |                                       |   |                    |                                                                 |   |                    |                        |
| 52 | tabaco_escena_parafernalia<br><br>Mostrar el archivo SÓLO si:<br>[tabaco_escena_explicito]<>"                                                                                                                                                                                                                                                                                                                                                                                                                                                                                                                                                                                                                                                                                                                                                                                                                                                                                                           | 44. ¿Aparece en este minuto parafernalia del tabaco?                                                                                                            | yesno<br><table border="1"> <tr> <td>1</td> <td>Sí</td> </tr> <tr> <td>0</td> <td>No</td> </tr> </table>                                                                                                                                                                                                                                                                                                                                                                                                                                                                                                                                                                                                                                                                                                                                                                                                                                                                   | 1 | Sí                            | 0                                                                   | No                                |                    |                                                                        |   |                    |                                                                          |   |                    |                                                                                                                             |   |                    |                                       |   |                    |                                                                 |   |                    |                        |
| 1  | Sí                                                                                                                                                                                                                                                                                                                                                                                                                                                                                                                                                                                                                                                                                                                                                                                                                                                                                                                                                                                                      |                                                                                                                                                                 |                                                                                                                                                                                                                                                                                                                                                                                                                                                                                                                                                                                                                                                                                                                                                                                                                                                                                                                                                                            |   |                               |                                                                     |                                   |                    |                                                                        |   |                    |                                                                          |   |                    |                                                                                                                             |   |                    |                                       |   |                    |                                                                 |   |                    |                        |
| 0  | No                                                                                                                                                                                                                                                                                                                                                                                                                                                                                                                                                                                                                                                                                                                                                                                                                                                                                                                                                                                                      |                                                                                                                                                                 |                                                                                                                                                                                                                                                                                                                                                                                                                                                                                                                                                                                                                                                                                                                                                                                                                                                                                                                                                                            |   |                               |                                                                     |                                   |                    |                                                                        |   |                    |                                                                          |   |                    |                                                                                                                             |   |                    |                                       |   |                    |                                                                 |   |                    |                        |

23/10/2020

FONIS TABACO V2.0 | REDCap

|    |                                                                                                                                                                                                                                                  |                                                                                                                                      |                                                                          |
|----|--------------------------------------------------------------------------------------------------------------------------------------------------------------------------------------------------------------------------------------------------|--------------------------------------------------------------------------------------------------------------------------------------|--------------------------------------------------------------------------|
| 53 | prendidos<br>Mostrar el archivo SÓLO si:<br>[tabaco_escena_parafernalia]=1'                                                                                                                                                                      | 45.- ¿se ve uno o varios productos de tabaco no prendidos (incluidas hoja de tabaco y colillas)?                                     | yesno<br>1 Si<br>0 No                                                    |
| 54 | envoltorios<br>Mostrar el archivo SÓLO si:<br>[prendidos]<>"                                                                                                                                                                                     | 46.- ¿Se ve uno o más envoltorios/recipientes de productos de tabaco?                                                                | yesno<br>1 Si<br>0 No                                                    |
| 55 | fosforos<br>Mostrar el archivo SÓLO si:<br>[envoltorios]<>"                                                                                                                                                                                      | 47.- ¿Se ven encendedores, fósforos, ceniceros, papel para enrollar tabaco, filtros para cigarrillos, aunque no estén siendo usados? | yesno<br>1 Si<br>0 No                                                    |
| 56 | objetos<br>Mostrar el archivo SÓLO si:<br>[fosforos]<>"                                                                                                                                                                                          | 48.- ¿Se ven otros objetos relacionados con el tabaco no mencionados anteriormente?                                                  | yesno<br>1 Si<br>0 No                                                    |
| 57 | alerta_45_a_48<br>Mostrar el archivo SÓLO si:<br>[prendidos]=0' and [envoltorios]=0' and [fosforos]=0' and [objetos]=0'                                                                                                                          | Debe responder afirmativamente una de las últimas cuatro preguntas (45, 46, 47 ó 48).                                                | descriptive                                                              |
| 58 | tabaco_escena_marca<br>Mostrar el archivo SÓLO si:<br>[tabaco_escena_parafernalia]=0' and [respuestas_iguales]=0' or [tabaco_escena_parafernalia]=0' and [minuto]=0' or [objetos]<>" and [respuestas_iguales]=0' or [objetos]<>" and [minuto]=0' | 49.- ¿Aparece en este minuto alguna marca de tabaco?                                                                                 | yesno<br>1 Si<br>0 No                                                    |
| 59 | tabaco_escena_otras_ref<br>Mostrar el archivo SÓLO si:<br>[tabaco_escena_marca]<>"                                                                                                                                                               | 50.- ¿Aparecen en este minuto otras referencias al tabaco no consideradas en las preguntas anteriores?                               | yesno<br>1 Si<br>0 No                                                    |
| 60 | percepcion<br>Mostrar el archivo SÓLO si:<br>[tabaco_escena_otras_ref]=1' or [tabaco_explicito]=1' or [tabaco_escena_explicito]=1' or [tabaco_escena_parafernalia]=1' or [tabaco_escena_marca]=1'                                                | 51.- ¿Cómo percibe usted el impacto para la salud pública de las impresiones tabáquicas que ha visto en este minuto?                 | radio<br>1 Negativo<br>2 Positivo<br>3 Mixto<br>4 No se puede determinar |
| 61 | torpedo_3                                                                                                                                                                                                                                        | TORPEDO 3: LÓGICAS DE BIFURCACIÓN                                                                                                    | descriptive<br>Field Annotation: @HIDDEN                                 |
| 62 | pauta                                                                                                                                                                                                                                            | PAUTA                                                                                                                                | descriptive<br>Field Annotation: @HIDDEN                                 |
| 63 | enviar<br>Mostrar el archivo SÓLO si:<br>[programa_sn]=0' or [respuestas_iguales]=1'                                                                                                                                                             | Section Header:<br><br>FIN envíe las respuestas y continúe con el siguiente minuto.                                                  | descriptive                                                              |
| 64 | fecha_hora_registro_2                                                                                                                                                                                                                            | Fecha y hora de registro                                                                                                             | text (datetime_dmy)<br>Field Annotation: @NOW @READONLY @HIDDEN-SURVEY   |
| 65 | txt_instruccion                                                                                                                                                                                                                                  | No presione el botón "ENVIAR" sino hasta haber completado la encuesta                                                                | descriptive                                                              |
| 66 | fonis_tabaco_visualizador_completo                                                                                                                                                                                                               | Section Header: <i>Form Status</i><br>Complete?                                                                                      | dropdown<br>0 Incomplete<br>1 Unverified<br>2 Complete                   |

Instrumento: **Fonis Tabaco Supervisor** (fonis\_tabaco\_supervisor) [^ Collapse](#)

https://redcap.ci3.cl/redcap\_v9.7.5/Design/data\_dictionary\_codebook.php?pid=182

10/31

23/10/2020

FONIS TABACO V2.0 | REDCap

|    |                      |                            |                                                                                                                                                                                                                                                                                                                                                                                                                                                                                                                                                                                  |   |                |   |                 |   |               |   |                  |   |               |   |                   |   |                   |   |                 |   |                 |    |                 |    |                 |    |                 |
|----|----------------------|----------------------------|----------------------------------------------------------------------------------------------------------------------------------------------------------------------------------------------------------------------------------------------------------------------------------------------------------------------------------------------------------------------------------------------------------------------------------------------------------------------------------------------------------------------------------------------------------------------------------|---|----------------|---|-----------------|---|---------------|---|------------------|---|---------------|---|-------------------|---|-------------------|---|-----------------|---|-----------------|----|-----------------|----|-----------------|----|-----------------|
| 67 | srecord_id           | Record ID                  | text                                                                                                                                                                                                                                                                                                                                                                                                                                                                                                                                                                             |   |                |   |                 |   |               |   |                  |   |               |   |                   |   |                   |   |                 |   |                 |    |                 |    |                 |    |                 |
| 68 | sfecha_hora_registro | Fecha y hora de registro   | text (datetime_dmy)<br>Field Annotation: @NOW @READONLY @HIDDEN-SURVEY                                                                                                                                                                                                                                                                                                                                                                                                                                                                                                           |   |                |   |                 |   |               |   |                  |   |               |   |                   |   |                   |   |                 |   |                 |    |                 |    |                 |    |                 |
| 69 | ssupervisor          | Supervisor:                | radio <table><tr><td>1</td><td>Oscar Urrejola</td></tr><tr><td>2</td><td>Armando Peruga</td></tr><tr><td>3</td><td>Isabel Matute</td></tr><tr><td>4</td><td>Xavieria Molina</td></tr><tr><td>5</td><td>Fernando Soto</td></tr><tr><td>6</td><td>Benjamín Giordano</td></tr><tr><td>7</td><td>Antonia Bandera</td></tr><tr><td>8</td><td>Olaya Moena</td></tr></table>                                                                                                                                                                                                            | 1 | Oscar Urrejola | 2 | Armando Peruga  | 3 | Isabel Matute | 4 | Xavieria Molina  | 5 | Fernando Soto | 6 | Benjamín Giordano | 7 | Antonia Bandera   | 8 | Olaya Moena     |   |                 |    |                 |    |                 |    |                 |
| 1  | Oscar Urrejola       |                            |                                                                                                                                                                                                                                                                                                                                                                                                                                                                                                                                                                                  |   |                |   |                 |   |               |   |                  |   |               |   |                   |   |                   |   |                 |   |                 |    |                 |    |                 |    |                 |
| 2  | Armando Peruga       |                            |                                                                                                                                                                                                                                                                                                                                                                                                                                                                                                                                                                                  |   |                |   |                 |   |               |   |                  |   |               |   |                   |   |                   |   |                 |   |                 |    |                 |    |                 |    |                 |
| 3  | Isabel Matute        |                            |                                                                                                                                                                                                                                                                                                                                                                                                                                                                                                                                                                                  |   |                |   |                 |   |               |   |                  |   |               |   |                   |   |                   |   |                 |   |                 |    |                 |    |                 |    |                 |
| 4  | Xavieria Molina      |                            |                                                                                                                                                                                                                                                                                                                                                                                                                                                                                                                                                                                  |   |                |   |                 |   |               |   |                  |   |               |   |                   |   |                   |   |                 |   |                 |    |                 |    |                 |    |                 |
| 5  | Fernando Soto        |                            |                                                                                                                                                                                                                                                                                                                                                                                                                                                                                                                                                                                  |   |                |   |                 |   |               |   |                  |   |               |   |                   |   |                   |   |                 |   |                 |    |                 |    |                 |    |                 |
| 6  | Benjamín Giordano    |                            |                                                                                                                                                                                                                                                                                                                                                                                                                                                                                                                                                                                  |   |                |   |                 |   |               |   |                  |   |               |   |                   |   |                   |   |                 |   |                 |    |                 |    |                 |    |                 |
| 7  | Antonia Bandera      |                            |                                                                                                                                                                                                                                                                                                                                                                                                                                                                                                                                                                                  |   |                |   |                 |   |               |   |                  |   |               |   |                   |   |                   |   |                 |   |                 |    |                 |    |                 |    |                 |
| 8  | Olaya Moena          |                            |                                                                                                                                                                                                                                                                                                                                                                                                                                                                                                                                                                                  |   |                |   |                 |   |               |   |                  |   |               |   |                   |   |                   |   |                 |   |                 |    |                 |    |                 |    |                 |
| 70 | scod                 | 1.- Nombre del observador: | dropdown (autocomplete), Required <table><tr><td>1</td><td>Oscar Urrejola</td></tr><tr><td>2</td><td>Xavieria Molina</td></tr><tr><td>3</td><td>Andrea Olea</td></tr><tr><td>4</td><td>Claudia Gonzalez</td></tr><tr><td>5</td><td>Fernando Soto</td></tr><tr><td>6</td><td>Olaya Moena</td></tr><tr><td>7</td><td>Benjamín Giordano</td></tr><tr><td>8</td><td>Javiera Martini</td></tr><tr><td>9</td><td>Verónica Toledo</td></tr><tr><td>10</td><td>Bastian Infante</td></tr><tr><td>11</td><td>Pamela Urrejola</td></tr><tr><td>12</td><td>Antonia Bandera</td></tr></table> | 1 | Oscar Urrejola | 2 | Xavieria Molina | 3 | Andrea Olea   | 4 | Claudia Gonzalez | 5 | Fernando Soto | 6 | Olaya Moena       | 7 | Benjamín Giordano | 8 | Javiera Martini | 9 | Verónica Toledo | 10 | Bastian Infante | 11 | Pamela Urrejola | 12 | Antonia Bandera |
| 1  | Oscar Urrejola       |                            |                                                                                                                                                                                                                                                                                                                                                                                                                                                                                                                                                                                  |   |                |   |                 |   |               |   |                  |   |               |   |                   |   |                   |   |                 |   |                 |    |                 |    |                 |    |                 |
| 2  | Xavieria Molina      |                            |                                                                                                                                                                                                                                                                                                                                                                                                                                                                                                                                                                                  |   |                |   |                 |   |               |   |                  |   |               |   |                   |   |                   |   |                 |   |                 |    |                 |    |                 |    |                 |
| 3  | Andrea Olea          |                            |                                                                                                                                                                                                                                                                                                                                                                                                                                                                                                                                                                                  |   |                |   |                 |   |               |   |                  |   |               |   |                   |   |                   |   |                 |   |                 |    |                 |    |                 |    |                 |
| 4  | Claudia Gonzalez     |                            |                                                                                                                                                                                                                                                                                                                                                                                                                                                                                                                                                                                  |   |                |   |                 |   |               |   |                  |   |               |   |                   |   |                   |   |                 |   |                 |    |                 |    |                 |    |                 |
| 5  | Fernando Soto        |                            |                                                                                                                                                                                                                                                                                                                                                                                                                                                                                                                                                                                  |   |                |   |                 |   |               |   |                  |   |               |   |                   |   |                   |   |                 |   |                 |    |                 |    |                 |    |                 |
| 6  | Olaya Moena          |                            |                                                                                                                                                                                                                                                                                                                                                                                                                                                                                                                                                                                  |   |                |   |                 |   |               |   |                  |   |               |   |                   |   |                   |   |                 |   |                 |    |                 |    |                 |    |                 |
| 7  | Benjamín Giordano    |                            |                                                                                                                                                                                                                                                                                                                                                                                                                                                                                                                                                                                  |   |                |   |                 |   |               |   |                  |   |               |   |                   |   |                   |   |                 |   |                 |    |                 |    |                 |    |                 |
| 8  | Javiera Martini      |                            |                                                                                                                                                                                                                                                                                                                                                                                                                                                                                                                                                                                  |   |                |   |                 |   |               |   |                  |   |               |   |                   |   |                   |   |                 |   |                 |    |                 |    |                 |    |                 |
| 9  | Verónica Toledo      |                            |                                                                                                                                                                                                                                                                                                                                                                                                                                                                                                                                                                                  |   |                |   |                 |   |               |   |                  |   |               |   |                   |   |                   |   |                 |   |                 |    |                 |    |                 |    |                 |
| 10 | Bastian Infante      |                            |                                                                                                                                                                                                                                                                                                                                                                                                                                                                                                                                                                                  |   |                |   |                 |   |               |   |                  |   |               |   |                   |   |                   |   |                 |   |                 |    |                 |    |                 |    |                 |
| 11 | Pamela Urrejola      |                            |                                                                                                                                                                                                                                                                                                                                                                                                                                                                                                                                                                                  |   |                |   |                 |   |               |   |                  |   |               |   |                   |   |                   |   |                 |   |                 |    |                 |    |                 |    |                 |
| 12 | Antonia Bandera      |                            |                                                                                                                                                                                                                                                                                                                                                                                                                                                                                                                                                                                  |   |                |   |                 |   |               |   |                  |   |               |   |                   |   |                   |   |                 |   |                 |    |                 |    |                 |    |                 |

23/10/2020

FONIS TABACO V2.0 | REDCap

|    |                                                                                                                            |                                                                                                                                               |                                                                                                                                                                                                                                                                                                                                                                                                                                                                                                                                                                                                                                                                                                                                                                                                                                                                                                                                                                                       |   |    |   |    |   |   |   |   |   |   |   |   |   |   |   |   |   |   |   |   |    |    |    |    |    |    |    |    |    |    |    |    |    |    |    |    |    |    |    |    |    |    |    |    |    |    |    |    |    |    |    |    |    |    |    |    |    |    |    |    |
|----|----------------------------------------------------------------------------------------------------------------------------|-----------------------------------------------------------------------------------------------------------------------------------------------|---------------------------------------------------------------------------------------------------------------------------------------------------------------------------------------------------------------------------------------------------------------------------------------------------------------------------------------------------------------------------------------------------------------------------------------------------------------------------------------------------------------------------------------------------------------------------------------------------------------------------------------------------------------------------------------------------------------------------------------------------------------------------------------------------------------------------------------------------------------------------------------------------------------------------------------------------------------------------------------|---|----|---|----|---|---|---|---|---|---|---|---|---|---|---|---|---|---|---|---|----|----|----|----|----|----|----|----|----|----|----|----|----|----|----|----|----|----|----|----|----|----|----|----|----|----|----|----|----|----|----|----|----|----|----|----|----|----|----|----|
| 71 | sminuto                                                                                                                    | 2.- Indique el minuto de emisión<br><br><i>Se considera minuto 0 desde el 00:00 hasta el 00:59</i>                                            | dropdown (autocomplete) <table><tr><td>0</td><td>0</td></tr><tr><td>1</td><td>1</td></tr><tr><td>2</td><td>2</td></tr><tr><td>3</td><td>3</td></tr><tr><td>4</td><td>4</td></tr><tr><td>5</td><td>5</td></tr><tr><td>6</td><td>6</td></tr><tr><td>7</td><td>7</td></tr><tr><td>8</td><td>8</td></tr><tr><td>9</td><td>9</td></tr><tr><td>10</td><td>10</td></tr><tr><td>11</td><td>11</td></tr><tr><td>12</td><td>12</td></tr><tr><td>13</td><td>13</td></tr><tr><td>14</td><td>14</td></tr><tr><td>15</td><td>15</td></tr><tr><td>16</td><td>16</td></tr><tr><td>17</td><td>17</td></tr><tr><td>18</td><td>18</td></tr><tr><td>19</td><td>19</td></tr><tr><td>20</td><td>20</td></tr><tr><td>21</td><td>21</td></tr><tr><td>22</td><td>22</td></tr><tr><td>23</td><td>23</td></tr><tr><td>24</td><td>24</td></tr><tr><td>25</td><td>25</td></tr><tr><td>26</td><td>26</td></tr><tr><td>27</td><td>27</td></tr><tr><td>28</td><td>28</td></tr><tr><td>29</td><td>29</td></tr></table> | 0 | 0  | 1 | 1  | 2 | 2 | 3 | 3 | 4 | 4 | 5 | 5 | 6 | 6 | 7 | 7 | 8 | 8 | 9 | 9 | 10 | 10 | 11 | 11 | 12 | 12 | 13 | 13 | 14 | 14 | 15 | 15 | 16 | 16 | 17 | 17 | 18 | 18 | 19 | 19 | 20 | 20 | 21 | 21 | 22 | 22 | 23 | 23 | 24 | 24 | 25 | 25 | 26 | 26 | 27 | 27 | 28 | 28 | 29 | 29 |
| 0  | 0                                                                                                                          |                                                                                                                                               |                                                                                                                                                                                                                                                                                                                                                                                                                                                                                                                                                                                                                                                                                                                                                                                                                                                                                                                                                                                       |   |    |   |    |   |   |   |   |   |   |   |   |   |   |   |   |   |   |   |   |    |    |    |    |    |    |    |    |    |    |    |    |    |    |    |    |    |    |    |    |    |    |    |    |    |    |    |    |    |    |    |    |    |    |    |    |    |    |    |    |
| 1  | 1                                                                                                                          |                                                                                                                                               |                                                                                                                                                                                                                                                                                                                                                                                                                                                                                                                                                                                                                                                                                                                                                                                                                                                                                                                                                                                       |   |    |   |    |   |   |   |   |   |   |   |   |   |   |   |   |   |   |   |   |    |    |    |    |    |    |    |    |    |    |    |    |    |    |    |    |    |    |    |    |    |    |    |    |    |    |    |    |    |    |    |    |    |    |    |    |    |    |    |    |
| 2  | 2                                                                                                                          |                                                                                                                                               |                                                                                                                                                                                                                                                                                                                                                                                                                                                                                                                                                                                                                                                                                                                                                                                                                                                                                                                                                                                       |   |    |   |    |   |   |   |   |   |   |   |   |   |   |   |   |   |   |   |   |    |    |    |    |    |    |    |    |    |    |    |    |    |    |    |    |    |    |    |    |    |    |    |    |    |    |    |    |    |    |    |    |    |    |    |    |    |    |    |    |
| 3  | 3                                                                                                                          |                                                                                                                                               |                                                                                                                                                                                                                                                                                                                                                                                                                                                                                                                                                                                                                                                                                                                                                                                                                                                                                                                                                                                       |   |    |   |    |   |   |   |   |   |   |   |   |   |   |   |   |   |   |   |   |    |    |    |    |    |    |    |    |    |    |    |    |    |    |    |    |    |    |    |    |    |    |    |    |    |    |    |    |    |    |    |    |    |    |    |    |    |    |    |    |
| 4  | 4                                                                                                                          |                                                                                                                                               |                                                                                                                                                                                                                                                                                                                                                                                                                                                                                                                                                                                                                                                                                                                                                                                                                                                                                                                                                                                       |   |    |   |    |   |   |   |   |   |   |   |   |   |   |   |   |   |   |   |   |    |    |    |    |    |    |    |    |    |    |    |    |    |    |    |    |    |    |    |    |    |    |    |    |    |    |    |    |    |    |    |    |    |    |    |    |    |    |    |    |
| 5  | 5                                                                                                                          |                                                                                                                                               |                                                                                                                                                                                                                                                                                                                                                                                                                                                                                                                                                                                                                                                                                                                                                                                                                                                                                                                                                                                       |   |    |   |    |   |   |   |   |   |   |   |   |   |   |   |   |   |   |   |   |    |    |    |    |    |    |    |    |    |    |    |    |    |    |    |    |    |    |    |    |    |    |    |    |    |    |    |    |    |    |    |    |    |    |    |    |    |    |    |    |
| 6  | 6                                                                                                                          |                                                                                                                                               |                                                                                                                                                                                                                                                                                                                                                                                                                                                                                                                                                                                                                                                                                                                                                                                                                                                                                                                                                                                       |   |    |   |    |   |   |   |   |   |   |   |   |   |   |   |   |   |   |   |   |    |    |    |    |    |    |    |    |    |    |    |    |    |    |    |    |    |    |    |    |    |    |    |    |    |    |    |    |    |    |    |    |    |    |    |    |    |    |    |    |
| 7  | 7                                                                                                                          |                                                                                                                                               |                                                                                                                                                                                                                                                                                                                                                                                                                                                                                                                                                                                                                                                                                                                                                                                                                                                                                                                                                                                       |   |    |   |    |   |   |   |   |   |   |   |   |   |   |   |   |   |   |   |   |    |    |    |    |    |    |    |    |    |    |    |    |    |    |    |    |    |    |    |    |    |    |    |    |    |    |    |    |    |    |    |    |    |    |    |    |    |    |    |    |
| 8  | 8                                                                                                                          |                                                                                                                                               |                                                                                                                                                                                                                                                                                                                                                                                                                                                                                                                                                                                                                                                                                                                                                                                                                                                                                                                                                                                       |   |    |   |    |   |   |   |   |   |   |   |   |   |   |   |   |   |   |   |   |    |    |    |    |    |    |    |    |    |    |    |    |    |    |    |    |    |    |    |    |    |    |    |    |    |    |    |    |    |    |    |    |    |    |    |    |    |    |    |    |
| 9  | 9                                                                                                                          |                                                                                                                                               |                                                                                                                                                                                                                                                                                                                                                                                                                                                                                                                                                                                                                                                                                                                                                                                                                                                                                                                                                                                       |   |    |   |    |   |   |   |   |   |   |   |   |   |   |   |   |   |   |   |   |    |    |    |    |    |    |    |    |    |    |    |    |    |    |    |    |    |    |    |    |    |    |    |    |    |    |    |    |    |    |    |    |    |    |    |    |    |    |    |    |
| 10 | 10                                                                                                                         |                                                                                                                                               |                                                                                                                                                                                                                                                                                                                                                                                                                                                                                                                                                                                                                                                                                                                                                                                                                                                                                                                                                                                       |   |    |   |    |   |   |   |   |   |   |   |   |   |   |   |   |   |   |   |   |    |    |    |    |    |    |    |    |    |    |    |    |    |    |    |    |    |    |    |    |    |    |    |    |    |    |    |    |    |    |    |    |    |    |    |    |    |    |    |    |
| 11 | 11                                                                                                                         |                                                                                                                                               |                                                                                                                                                                                                                                                                                                                                                                                                                                                                                                                                                                                                                                                                                                                                                                                                                                                                                                                                                                                       |   |    |   |    |   |   |   |   |   |   |   |   |   |   |   |   |   |   |   |   |    |    |    |    |    |    |    |    |    |    |    |    |    |    |    |    |    |    |    |    |    |    |    |    |    |    |    |    |    |    |    |    |    |    |    |    |    |    |    |    |
| 12 | 12                                                                                                                         |                                                                                                                                               |                                                                                                                                                                                                                                                                                                                                                                                                                                                                                                                                                                                                                                                                                                                                                                                                                                                                                                                                                                                       |   |    |   |    |   |   |   |   |   |   |   |   |   |   |   |   |   |   |   |   |    |    |    |    |    |    |    |    |    |    |    |    |    |    |    |    |    |    |    |    |    |    |    |    |    |    |    |    |    |    |    |    |    |    |    |    |    |    |    |    |
| 13 | 13                                                                                                                         |                                                                                                                                               |                                                                                                                                                                                                                                                                                                                                                                                                                                                                                                                                                                                                                                                                                                                                                                                                                                                                                                                                                                                       |   |    |   |    |   |   |   |   |   |   |   |   |   |   |   |   |   |   |   |   |    |    |    |    |    |    |    |    |    |    |    |    |    |    |    |    |    |    |    |    |    |    |    |    |    |    |    |    |    |    |    |    |    |    |    |    |    |    |    |    |
| 14 | 14                                                                                                                         |                                                                                                                                               |                                                                                                                                                                                                                                                                                                                                                                                                                                                                                                                                                                                                                                                                                                                                                                                                                                                                                                                                                                                       |   |    |   |    |   |   |   |   |   |   |   |   |   |   |   |   |   |   |   |   |    |    |    |    |    |    |    |    |    |    |    |    |    |    |    |    |    |    |    |    |    |    |    |    |    |    |    |    |    |    |    |    |    |    |    |    |    |    |    |    |
| 15 | 15                                                                                                                         |                                                                                                                                               |                                                                                                                                                                                                                                                                                                                                                                                                                                                                                                                                                                                                                                                                                                                                                                                                                                                                                                                                                                                       |   |    |   |    |   |   |   |   |   |   |   |   |   |   |   |   |   |   |   |   |    |    |    |    |    |    |    |    |    |    |    |    |    |    |    |    |    |    |    |    |    |    |    |    |    |    |    |    |    |    |    |    |    |    |    |    |    |    |    |    |
| 16 | 16                                                                                                                         |                                                                                                                                               |                                                                                                                                                                                                                                                                                                                                                                                                                                                                                                                                                                                                                                                                                                                                                                                                                                                                                                                                                                                       |   |    |   |    |   |   |   |   |   |   |   |   |   |   |   |   |   |   |   |   |    |    |    |    |    |    |    |    |    |    |    |    |    |    |    |    |    |    |    |    |    |    |    |    |    |    |    |    |    |    |    |    |    |    |    |    |    |    |    |    |
| 17 | 17                                                                                                                         |                                                                                                                                               |                                                                                                                                                                                                                                                                                                                                                                                                                                                                                                                                                                                                                                                                                                                                                                                                                                                                                                                                                                                       |   |    |   |    |   |   |   |   |   |   |   |   |   |   |   |   |   |   |   |   |    |    |    |    |    |    |    |    |    |    |    |    |    |    |    |    |    |    |    |    |    |    |    |    |    |    |    |    |    |    |    |    |    |    |    |    |    |    |    |    |
| 18 | 18                                                                                                                         |                                                                                                                                               |                                                                                                                                                                                                                                                                                                                                                                                                                                                                                                                                                                                                                                                                                                                                                                                                                                                                                                                                                                                       |   |    |   |    |   |   |   |   |   |   |   |   |   |   |   |   |   |   |   |   |    |    |    |    |    |    |    |    |    |    |    |    |    |    |    |    |    |    |    |    |    |    |    |    |    |    |    |    |    |    |    |    |    |    |    |    |    |    |    |    |
| 19 | 19                                                                                                                         |                                                                                                                                               |                                                                                                                                                                                                                                                                                                                                                                                                                                                                                                                                                                                                                                                                                                                                                                                                                                                                                                                                                                                       |   |    |   |    |   |   |   |   |   |   |   |   |   |   |   |   |   |   |   |   |    |    |    |    |    |    |    |    |    |    |    |    |    |    |    |    |    |    |    |    |    |    |    |    |    |    |    |    |    |    |    |    |    |    |    |    |    |    |    |    |
| 20 | 20                                                                                                                         |                                                                                                                                               |                                                                                                                                                                                                                                                                                                                                                                                                                                                                                                                                                                                                                                                                                                                                                                                                                                                                                                                                                                                       |   |    |   |    |   |   |   |   |   |   |   |   |   |   |   |   |   |   |   |   |    |    |    |    |    |    |    |    |    |    |    |    |    |    |    |    |    |    |    |    |    |    |    |    |    |    |    |    |    |    |    |    |    |    |    |    |    |    |    |    |
| 21 | 21                                                                                                                         |                                                                                                                                               |                                                                                                                                                                                                                                                                                                                                                                                                                                                                                                                                                                                                                                                                                                                                                                                                                                                                                                                                                                                       |   |    |   |    |   |   |   |   |   |   |   |   |   |   |   |   |   |   |   |   |    |    |    |    |    |    |    |    |    |    |    |    |    |    |    |    |    |    |    |    |    |    |    |    |    |    |    |    |    |    |    |    |    |    |    |    |    |    |    |    |
| 22 | 22                                                                                                                         |                                                                                                                                               |                                                                                                                                                                                                                                                                                                                                                                                                                                                                                                                                                                                                                                                                                                                                                                                                                                                                                                                                                                                       |   |    |   |    |   |   |   |   |   |   |   |   |   |   |   |   |   |   |   |   |    |    |    |    |    |    |    |    |    |    |    |    |    |    |    |    |    |    |    |    |    |    |    |    |    |    |    |    |    |    |    |    |    |    |    |    |    |    |    |    |
| 23 | 23                                                                                                                         |                                                                                                                                               |                                                                                                                                                                                                                                                                                                                                                                                                                                                                                                                                                                                                                                                                                                                                                                                                                                                                                                                                                                                       |   |    |   |    |   |   |   |   |   |   |   |   |   |   |   |   |   |   |   |   |    |    |    |    |    |    |    |    |    |    |    |    |    |    |    |    |    |    |    |    |    |    |    |    |    |    |    |    |    |    |    |    |    |    |    |    |    |    |    |    |
| 24 | 24                                                                                                                         |                                                                                                                                               |                                                                                                                                                                                                                                                                                                                                                                                                                                                                                                                                                                                                                                                                                                                                                                                                                                                                                                                                                                                       |   |    |   |    |   |   |   |   |   |   |   |   |   |   |   |   |   |   |   |   |    |    |    |    |    |    |    |    |    |    |    |    |    |    |    |    |    |    |    |    |    |    |    |    |    |    |    |    |    |    |    |    |    |    |    |    |    |    |    |    |
| 25 | 25                                                                                                                         |                                                                                                                                               |                                                                                                                                                                                                                                                                                                                                                                                                                                                                                                                                                                                                                                                                                                                                                                                                                                                                                                                                                                                       |   |    |   |    |   |   |   |   |   |   |   |   |   |   |   |   |   |   |   |   |    |    |    |    |    |    |    |    |    |    |    |    |    |    |    |    |    |    |    |    |    |    |    |    |    |    |    |    |    |    |    |    |    |    |    |    |    |    |    |    |
| 26 | 26                                                                                                                         |                                                                                                                                               |                                                                                                                                                                                                                                                                                                                                                                                                                                                                                                                                                                                                                                                                                                                                                                                                                                                                                                                                                                                       |   |    |   |    |   |   |   |   |   |   |   |   |   |   |   |   |   |   |   |   |    |    |    |    |    |    |    |    |    |    |    |    |    |    |    |    |    |    |    |    |    |    |    |    |    |    |    |    |    |    |    |    |    |    |    |    |    |    |    |    |
| 27 | 27                                                                                                                         |                                                                                                                                               |                                                                                                                                                                                                                                                                                                                                                                                                                                                                                                                                                                                                                                                                                                                                                                                                                                                                                                                                                                                       |   |    |   |    |   |   |   |   |   |   |   |   |   |   |   |   |   |   |   |   |    |    |    |    |    |    |    |    |    |    |    |    |    |    |    |    |    |    |    |    |    |    |    |    |    |    |    |    |    |    |    |    |    |    |    |    |    |    |    |    |
| 28 | 28                                                                                                                         |                                                                                                                                               |                                                                                                                                                                                                                                                                                                                                                                                                                                                                                                                                                                                                                                                                                                                                                                                                                                                                                                                                                                                       |   |    |   |    |   |   |   |   |   |   |   |   |   |   |   |   |   |   |   |   |    |    |    |    |    |    |    |    |    |    |    |    |    |    |    |    |    |    |    |    |    |    |    |    |    |    |    |    |    |    |    |    |    |    |    |    |    |    |    |    |
| 29 | 29                                                                                                                         |                                                                                                                                               |                                                                                                                                                                                                                                                                                                                                                                                                                                                                                                                                                                                                                                                                                                                                                                                                                                                                                                                                                                                       |   |    |   |    |   |   |   |   |   |   |   |   |   |   |   |   |   |   |   |   |    |    |    |    |    |    |    |    |    |    |    |    |    |    |    |    |    |    |    |    |    |    |    |    |    |    |    |    |    |    |    |    |    |    |    |    |    |    |    |    |
| 72 | srespuestas_iguales<br><br>Mostrar el archivo SÓLO si:<br>[sminuto]<>'0' and [sminuto]<br><>"                              | 3.- ¿Las respuestas a TODAS las preguntas del cuestionario para este minuto son EXACTAMENTE iguales a las del minuto inmediatamente anterior? | yesno <table><tr><td>1</td><td>Si</td></tr><tr><td>0</td><td>No</td></tr></table>                                                                                                                                                                                                                                                                                                                                                                                                                                                                                                                                                                                                                                                                                                                                                                                                                                                                                                     | 1 | Si | 0 | No |   |   |   |   |   |   |   |   |   |   |   |   |   |   |   |   |    |    |    |    |    |    |    |    |    |    |    |    |    |    |    |    |    |    |    |    |    |    |    |    |    |    |    |    |    |    |    |    |    |    |    |    |    |    |    |    |
| 1  | Si                                                                                                                         |                                                                                                                                               |                                                                                                                                                                                                                                                                                                                                                                                                                                                                                                                                                                                                                                                                                                                                                                                                                                                                                                                                                                                       |   |    |   |    |   |   |   |   |   |   |   |   |   |   |   |   |   |   |   |   |    |    |    |    |    |    |    |    |    |    |    |    |    |    |    |    |    |    |    |    |    |    |    |    |    |    |    |    |    |    |    |    |    |    |    |    |    |    |    |    |
| 0  | No                                                                                                                         |                                                                                                                                               |                                                                                                                                                                                                                                                                                                                                                                                                                                                                                                                                                                                                                                                                                                                                                                                                                                                                                                                                                                                       |   |    |   |    |   |   |   |   |   |   |   |   |   |   |   |   |   |   |   |   |    |    |    |    |    |    |    |    |    |    |    |    |    |    |    |    |    |    |    |    |    |    |    |    |    |    |    |    |    |    |    |    |    |    |    |    |    |    |    |    |
| 73 | sfecha_emision<br><br>Mostrar el archivo SÓLO si:<br>[sminuto]='0' or [sminuto]<<br>>'0' and [srespuestas_iguales]<br>='0' | 4.- Fecha de emisión:                                                                                                                         | text (date_dmy)                                                                                                                                                                                                                                                                                                                                                                                                                                                                                                                                                                                                                                                                                                                                                                                                                                                                                                                                                                       |   |    |   |    |   |   |   |   |   |   |   |   |   |   |   |   |   |   |   |   |    |    |    |    |    |    |    |    |    |    |    |    |    |    |    |    |    |    |    |    |    |    |    |    |    |    |    |    |    |    |    |    |    |    |    |    |    |    |    |    |

23/10/2020

FONIS TABACO V2.0 | REDCap

|                 |                                                                                                                                    |                                                                                                                             |                                                                                                                                                                                                                                                                                                                                                                                                                                                                                                                                                                                                                                                                                                                                       |     |             |     |              |     |                        |          |              |                 |                 |             |                         |                |                |                |                |               |               |             |             |        |        |      |      |     |     |     |     |        |     |
|-----------------|------------------------------------------------------------------------------------------------------------------------------------|-----------------------------------------------------------------------------------------------------------------------------|---------------------------------------------------------------------------------------------------------------------------------------------------------------------------------------------------------------------------------------------------------------------------------------------------------------------------------------------------------------------------------------------------------------------------------------------------------------------------------------------------------------------------------------------------------------------------------------------------------------------------------------------------------------------------------------------------------------------------------------|-----|-------------|-----|--------------|-----|------------------------|----------|--------------|-----------------|-----------------|-------------|-------------------------|----------------|----------------|----------------|----------------|---------------|---------------|-------------|-------------|--------|--------|------|------|-----|-----|-----|-----|--------|-----|
| 74              | <b>sbloque_horario</b><br><br>Mostrar el archivo SÓLO si:<br>[sminuto]='0' or [sminuto]<<br>>'0' and [srespuestas_iguales]<br>='0' | 5.- Bloque horario de Emisión:                                                                                              | radio<br><table border="1"> <tr><td>1</td><td>20:00-20:29</td></tr> <tr><td>2</td><td>20:30-20:59</td></tr> <tr><td>3</td><td>21:00-21:29</td></tr> <tr><td>4</td><td>21:30-21:59</td></tr> <tr><td>5</td><td>22:00-22:29</td></tr> <tr><td>6</td><td>22:30-22:59</td></tr> <tr><td>7</td><td>23:00-23:29</td></tr> <tr><td>8</td><td>23:30-23:59</td></tr> <tr><td>9</td><td>00:00-00:29</td></tr> <tr><td>10</td><td>00:30-00:59</td></tr> </table>                                                                                                                                                                                                                                                                                 | 1   | 20:00-20:29 | 2   | 20:30-20:59  | 3   | 21:00-21:29            | 4        | 21:30-21:59  | 5               | 22:00-22:29     | 6           | 22:30-22:59             | 7              | 23:00-23:29    | 8              | 23:30-23:59    | 9             | 00:00-00:29   | 10          | 00:30-00:59 |        |        |      |      |     |     |     |     |        |     |
| 1               | 20:00-20:29                                                                                                                        |                                                                                                                             |                                                                                                                                                                                                                                                                                                                                                                                                                                                                                                                                                                                                                                                                                                                                       |     |             |     |              |     |                        |          |              |                 |                 |             |                         |                |                |                |                |               |               |             |             |        |        |      |      |     |     |     |     |        |     |
| 2               | 20:30-20:59                                                                                                                        |                                                                                                                             |                                                                                                                                                                                                                                                                                                                                                                                                                                                                                                                                                                                                                                                                                                                                       |     |             |     |              |     |                        |          |              |                 |                 |             |                         |                |                |                |                |               |               |             |             |        |        |      |      |     |     |     |     |        |     |
| 3               | 21:00-21:29                                                                                                                        |                                                                                                                             |                                                                                                                                                                                                                                                                                                                                                                                                                                                                                                                                                                                                                                                                                                                                       |     |             |     |              |     |                        |          |              |                 |                 |             |                         |                |                |                |                |               |               |             |             |        |        |      |      |     |     |     |     |        |     |
| 4               | 21:30-21:59                                                                                                                        |                                                                                                                             |                                                                                                                                                                                                                                                                                                                                                                                                                                                                                                                                                                                                                                                                                                                                       |     |             |     |              |     |                        |          |              |                 |                 |             |                         |                |                |                |                |               |               |             |             |        |        |      |      |     |     |     |     |        |     |
| 5               | 22:00-22:29                                                                                                                        |                                                                                                                             |                                                                                                                                                                                                                                                                                                                                                                                                                                                                                                                                                                                                                                                                                                                                       |     |             |     |              |     |                        |          |              |                 |                 |             |                         |                |                |                |                |               |               |             |             |        |        |      |      |     |     |     |     |        |     |
| 6               | 22:30-22:59                                                                                                                        |                                                                                                                             |                                                                                                                                                                                                                                                                                                                                                                                                                                                                                                                                                                                                                                                                                                                                       |     |             |     |              |     |                        |          |              |                 |                 |             |                         |                |                |                |                |               |               |             |             |        |        |      |      |     |     |     |     |        |     |
| 7               | 23:00-23:29                                                                                                                        |                                                                                                                             |                                                                                                                                                                                                                                                                                                                                                                                                                                                                                                                                                                                                                                                                                                                                       |     |             |     |              |     |                        |          |              |                 |                 |             |                         |                |                |                |                |               |               |             |             |        |        |      |      |     |     |     |     |        |     |
| 8               | 23:30-23:59                                                                                                                        |                                                                                                                             |                                                                                                                                                                                                                                                                                                                                                                                                                                                                                                                                                                                                                                                                                                                                       |     |             |     |              |     |                        |          |              |                 |                 |             |                         |                |                |                |                |               |               |             |             |        |        |      |      |     |     |     |     |        |     |
| 9               | 00:00-00:29                                                                                                                        |                                                                                                                             |                                                                                                                                                                                                                                                                                                                                                                                                                                                                                                                                                                                                                                                                                                                                       |     |             |     |              |     |                        |          |              |                 |                 |             |                         |                |                |                |                |               |               |             |             |        |        |      |      |     |     |     |     |        |     |
| 10              | 00:30-00:59                                                                                                                        |                                                                                                                             |                                                                                                                                                                                                                                                                                                                                                                                                                                                                                                                                                                                                                                                                                                                                       |     |             |     |              |     |                        |          |              |                 |                 |             |                         |                |                |                |                |               |               |             |             |        |        |      |      |     |     |     |     |        |     |
| 75              | <b>scanal</b><br><br>Mostrar el archivo SÓLO si:<br>[sminuto]='0' or [sminuto]<<br>>'0' and [srespuestas_iguales]<br>='0'          | 6.- Canal de TV:                                                                                                            | dropdown (autocomplete)<br><table border="1"> <tr><td>AyE</td><td>A&amp;E</td></tr> <tr><td>AMC</td><td>AMC</td></tr> <tr><td>AXN</td><td>AXN</td></tr> <tr><td>Canal_13</td><td>Canal 13</td></tr> <tr><td>Cartoon_Network</td><td>Cartoon Network</td></tr> <tr><td>Chilevision</td><td>Chilevisión</td></tr> <tr><td>Discovery_Kids</td><td>Discovery Kids</td></tr> <tr><td>Disney_Channel</td><td>Disney Channel</td></tr> <tr><td>Disney_Junior</td><td>Disney Junior</td></tr> <tr><td>Fox_Channel</td><td>Fox Channel</td></tr> <tr><td>La_Red</td><td>La Red</td></tr> <tr><td>Mega</td><td>Mega</td></tr> <tr><td>TNT</td><td>TNT</td></tr> <tr><td>TVN</td><td>TVN</td></tr> <tr><td>TV_mas</td><td>TV+</td></tr> </table> | AyE | A&E         | AMC | AMC          | AXN | AXN                    | Canal_13 | Canal 13     | Cartoon_Network | Cartoon Network | Chilevision | Chilevisión             | Discovery_Kids | Discovery Kids | Disney_Channel | Disney Channel | Disney_Junior | Disney Junior | Fox_Channel | Fox Channel | La_Red | La Red | Mega | Mega | TNT | TNT | TVN | TVN | TV_mas | TV+ |
| AyE             | A&E                                                                                                                                |                                                                                                                             |                                                                                                                                                                                                                                                                                                                                                                                                                                                                                                                                                                                                                                                                                                                                       |     |             |     |              |     |                        |          |              |                 |                 |             |                         |                |                |                |                |               |               |             |             |        |        |      |      |     |     |     |     |        |     |
| AMC             | AMC                                                                                                                                |                                                                                                                             |                                                                                                                                                                                                                                                                                                                                                                                                                                                                                                                                                                                                                                                                                                                                       |     |             |     |              |     |                        |          |              |                 |                 |             |                         |                |                |                |                |               |               |             |             |        |        |      |      |     |     |     |     |        |     |
| AXN             | AXN                                                                                                                                |                                                                                                                             |                                                                                                                                                                                                                                                                                                                                                                                                                                                                                                                                                                                                                                                                                                                                       |     |             |     |              |     |                        |          |              |                 |                 |             |                         |                |                |                |                |               |               |             |             |        |        |      |      |     |     |     |     |        |     |
| Canal_13        | Canal 13                                                                                                                           |                                                                                                                             |                                                                                                                                                                                                                                                                                                                                                                                                                                                                                                                                                                                                                                                                                                                                       |     |             |     |              |     |                        |          |              |                 |                 |             |                         |                |                |                |                |               |               |             |             |        |        |      |      |     |     |     |     |        |     |
| Cartoon_Network | Cartoon Network                                                                                                                    |                                                                                                                             |                                                                                                                                                                                                                                                                                                                                                                                                                                                                                                                                                                                                                                                                                                                                       |     |             |     |              |     |                        |          |              |                 |                 |             |                         |                |                |                |                |               |               |             |             |        |        |      |      |     |     |     |     |        |     |
| Chilevision     | Chilevisión                                                                                                                        |                                                                                                                             |                                                                                                                                                                                                                                                                                                                                                                                                                                                                                                                                                                                                                                                                                                                                       |     |             |     |              |     |                        |          |              |                 |                 |             |                         |                |                |                |                |               |               |             |             |        |        |      |      |     |     |     |     |        |     |
| Discovery_Kids  | Discovery Kids                                                                                                                     |                                                                                                                             |                                                                                                                                                                                                                                                                                                                                                                                                                                                                                                                                                                                                                                                                                                                                       |     |             |     |              |     |                        |          |              |                 |                 |             |                         |                |                |                |                |               |               |             |             |        |        |      |      |     |     |     |     |        |     |
| Disney_Channel  | Disney Channel                                                                                                                     |                                                                                                                             |                                                                                                                                                                                                                                                                                                                                                                                                                                                                                                                                                                                                                                                                                                                                       |     |             |     |              |     |                        |          |              |                 |                 |             |                         |                |                |                |                |               |               |             |             |        |        |      |      |     |     |     |     |        |     |
| Disney_Junior   | Disney Junior                                                                                                                      |                                                                                                                             |                                                                                                                                                                                                                                                                                                                                                                                                                                                                                                                                                                                                                                                                                                                                       |     |             |     |              |     |                        |          |              |                 |                 |             |                         |                |                |                |                |               |               |             |             |        |        |      |      |     |     |     |     |        |     |
| Fox_Channel     | Fox Channel                                                                                                                        |                                                                                                                             |                                                                                                                                                                                                                                                                                                                                                                                                                                                                                                                                                                                                                                                                                                                                       |     |             |     |              |     |                        |          |              |                 |                 |             |                         |                |                |                |                |               |               |             |             |        |        |      |      |     |     |     |     |        |     |
| La_Red          | La Red                                                                                                                             |                                                                                                                             |                                                                                                                                                                                                                                                                                                                                                                                                                                                                                                                                                                                                                                                                                                                                       |     |             |     |              |     |                        |          |              |                 |                 |             |                         |                |                |                |                |               |               |             |             |        |        |      |      |     |     |     |     |        |     |
| Mega            | Mega                                                                                                                               |                                                                                                                             |                                                                                                                                                                                                                                                                                                                                                                                                                                                                                                                                                                                                                                                                                                                                       |     |             |     |              |     |                        |          |              |                 |                 |             |                         |                |                |                |                |               |               |             |             |        |        |      |      |     |     |     |     |        |     |
| TNT             | TNT                                                                                                                                |                                                                                                                             |                                                                                                                                                                                                                                                                                                                                                                                                                                                                                                                                                                                                                                                                                                                                       |     |             |     |              |     |                        |          |              |                 |                 |             |                         |                |                |                |                |               |               |             |             |        |        |      |      |     |     |     |     |        |     |
| TVN             | TVN                                                                                                                                |                                                                                                                             |                                                                                                                                                                                                                                                                                                                                                                                                                                                                                                                                                                                                                                                                                                                                       |     |             |     |              |     |                        |          |              |                 |                 |             |                         |                |                |                |                |               |               |             |             |        |        |      |      |     |     |     |     |        |     |
| TV_mas          | TV+                                                                                                                                |                                                                                                                             |                                                                                                                                                                                                                                                                                                                                                                                                                                                                                                                                                                                                                                                                                                                                       |     |             |     |              |     |                        |          |              |                 |                 |             |                         |                |                |                |                |               |               |             |             |        |        |      |      |     |     |     |     |        |     |
| 76              | <b>semision</b><br><br>Mostrar el archivo SÓLO si:<br>[srespuestas_iguales]='0' or [s<br>minuto]='0'                               | Section Header:<br><br>8.- En este minuto ¿Ves o escuchas, aunque sea parcialmente,<br>un anuncio por al menos 10 segundos? | radio<br><table border="1"> <tr><td>1</td><td>Sí</td></tr> <tr><td>0</td><td>No</td></tr> </table>                                                                                                                                                                                                                                                                                                                                                                                                                                                                                                                                                                                                                                    | 1   | Sí          | 0   | No           |     |                        |          |              |                 |                 |             |                         |                |                |                |                |               |               |             |             |        |        |      |      |     |     |     |     |        |     |
| 1               | Sí                                                                                                                                 |                                                                                                                             |                                                                                                                                                                                                                                                                                                                                                                                                                                                                                                                                                                                                                                                                                                                                       |     |             |     |              |     |                        |          |              |                 |                 |             |                         |                |                |                |                |               |               |             |             |        |        |      |      |     |     |     |     |        |     |
| 0               | No                                                                                                                                 |                                                                                                                             |                                                                                                                                                                                                                                                                                                                                                                                                                                                                                                                                                                                                                                                                                                                                       |     |             |     |              |     |                        |          |              |                 |                 |             |                         |                |                |                |                |               |               |             |             |        |        |      |      |     |     |     |     |        |     |
| 77              | <b>stabaco_sn</b><br><br>Mostrar el archivo SÓLO si:<br>[semision]='1'                                                             | 9.- ¿Es un anuncio de tabaco?                                                                                               | radio<br><table border="1"> <tr><td>1</td><td>Sí</td></tr> <tr><td>0</td><td>No</td></tr> <tr><td>2</td><td>No se puede determinar</td></tr> </table>                                                                                                                                                                                                                                                                                                                                                                                                                                                                                                                                                                                 | 1   | Sí          | 0   | No           | 2   | No se puede determinar |          |              |                 |                 |             |                         |                |                |                |                |               |               |             |             |        |        |      |      |     |     |     |     |        |     |
| 1               | Sí                                                                                                                                 |                                                                                                                             |                                                                                                                                                                                                                                                                                                                                                                                                                                                                                                                                                                                                                                                                                                                                       |     |             |     |              |     |                        |          |              |                 |                 |             |                         |                |                |                |                |               |               |             |             |        |        |      |      |     |     |     |     |        |     |
| 0               | No                                                                                                                                 |                                                                                                                             |                                                                                                                                                                                                                                                                                                                                                                                                                                                                                                                                                                                                                                                                                                                                       |     |             |     |              |     |                        |          |              |                 |                 |             |                         |                |                |                |                |               |               |             |             |        |        |      |      |     |     |     |     |        |     |
| 2               | No se puede determinar                                                                                                             |                                                                                                                             |                                                                                                                                                                                                                                                                                                                                                                                                                                                                                                                                                                                                                                                                                                                                       |     |             |     |              |     |                        |          |              |                 |                 |             |                         |                |                |                |                |               |               |             |             |        |        |      |      |     |     |     |     |        |     |
| 78              | <b>stabaco_tipo</b><br><br>Mostrar el archivo SÓLO si:<br>[stabaco_sn]='1'                                                         | 10.- ¿Qué tipo de producto de tabaco se anuncia?                                                                            | radio<br><table border="1"> <tr><td>1</td><td>Cigarrillo</td></tr> <tr><td>2</td><td>Cigarro-puro</td></tr> <tr><td>3</td><td>Pipa</td></tr> <tr><td>4</td><td>Pipa de agua</td></tr> <tr><td>5</td><td>Vaporizador</td></tr> <tr><td>99</td><td>Otro producto de tabaco</td></tr> </table>                                                                                                                                                                                                                                                                                                                                                                                                                                           | 1   | Cigarrillo  | 2   | Cigarro-puro | 3   | Pipa                   | 4        | Pipa de agua | 5               | Vaporizador     | 99          | Otro producto de tabaco |                |                |                |                |               |               |             |             |        |        |      |      |     |     |     |     |        |     |
| 1               | Cigarrillo                                                                                                                         |                                                                                                                             |                                                                                                                                                                                                                                                                                                                                                                                                                                                                                                                                                                                                                                                                                                                                       |     |             |     |              |     |                        |          |              |                 |                 |             |                         |                |                |                |                |               |               |             |             |        |        |      |      |     |     |     |     |        |     |
| 2               | Cigarro-puro                                                                                                                       |                                                                                                                             |                                                                                                                                                                                                                                                                                                                                                                                                                                                                                                                                                                                                                                                                                                                                       |     |             |     |              |     |                        |          |              |                 |                 |             |                         |                |                |                |                |               |               |             |             |        |        |      |      |     |     |     |     |        |     |
| 3               | Pipa                                                                                                                               |                                                                                                                             |                                                                                                                                                                                                                                                                                                                                                                                                                                                                                                                                                                                                                                                                                                                                       |     |             |     |              |     |                        |          |              |                 |                 |             |                         |                |                |                |                |               |               |             |             |        |        |      |      |     |     |     |     |        |     |
| 4               | Pipa de agua                                                                                                                       |                                                                                                                             |                                                                                                                                                                                                                                                                                                                                                                                                                                                                                                                                                                                                                                                                                                                                       |     |             |     |              |     |                        |          |              |                 |                 |             |                         |                |                |                |                |               |               |             |             |        |        |      |      |     |     |     |     |        |     |
| 5               | Vaporizador                                                                                                                        |                                                                                                                             |                                                                                                                                                                                                                                                                                                                                                                                                                                                                                                                                                                                                                                                                                                                                       |     |             |     |              |     |                        |          |              |                 |                 |             |                         |                |                |                |                |               |               |             |             |        |        |      |      |     |     |     |     |        |     |
| 99              | Otro producto de tabaco                                                                                                            |                                                                                                                             |                                                                                                                                                                                                                                                                                                                                                                                                                                                                                                                                                                                                                                                                                                                                       |     |             |     |              |     |                        |          |              |                 |                 |             |                         |                |                |                |                |               |               |             |             |        |        |      |      |     |     |     |     |        |     |

23/10/2020

FONIS TABACO V2.0 | REDCap

|    |                                                                                                                                                                                                                                                                                                                                        |                                                                                                             |                                                                                                                                                                                                                                                                                                                                                                                         |   |                 |   |              |    |      |   |              |   |          |   |           |   |               |    |      |   |               |
|----|----------------------------------------------------------------------------------------------------------------------------------------------------------------------------------------------------------------------------------------------------------------------------------------------------------------------------------------|-------------------------------------------------------------------------------------------------------------|-----------------------------------------------------------------------------------------------------------------------------------------------------------------------------------------------------------------------------------------------------------------------------------------------------------------------------------------------------------------------------------------|---|-----------------|---|--------------|----|------|---|--------------|---|----------|---|-----------|---|---------------|----|------|---|---------------|
| 79 | stabaco_marca<br>Mostrar el archivo SÓLO si:<br>[stabaco_tipo]='1'                                                                                                                                                                                                                                                                     | 11.- Si es de cigarrillos ¿Qué marca de cigarrillos?                                                        | radio<br><table border="1"> <tr><td>1</td><td>Dunhill</td></tr> <tr><td>2</td><td>Kent</td></tr> <tr><td>3</td><td>L&amp;M</td></tr> <tr><td>4</td><td>Lucky Strike</td></tr> <tr><td>5</td><td>Marlboro</td></tr> <tr><td>6</td><td>Pall Mall</td></tr> <tr><td>7</td><td>Philip Morris</td></tr> <tr><td>99</td><td>Otra</td></tr> <tr><td>0</td><td>Indeterminada</td></tr> </table> | 1 | Dunhill         | 2 | Kent         | 3  | L&M  | 4 | Lucky Strike | 5 | Marlboro | 6 | Pall Mall | 7 | Philip Morris | 99 | Otra | 0 | Indeterminada |
| 1  | Dunhill                                                                                                                                                                                                                                                                                                                                |                                                                                                             |                                                                                                                                                                                                                                                                                                                                                                                         |   |                 |   |              |    |      |   |              |   |          |   |           |   |               |    |      |   |               |
| 2  | Kent                                                                                                                                                                                                                                                                                                                                   |                                                                                                             |                                                                                                                                                                                                                                                                                                                                                                                         |   |                 |   |              |    |      |   |              |   |          |   |           |   |               |    |      |   |               |
| 3  | L&M                                                                                                                                                                                                                                                                                                                                    |                                                                                                             |                                                                                                                                                                                                                                                                                                                                                                                         |   |                 |   |              |    |      |   |              |   |          |   |           |   |               |    |      |   |               |
| 4  | Lucky Strike                                                                                                                                                                                                                                                                                                                           |                                                                                                             |                                                                                                                                                                                                                                                                                                                                                                                         |   |                 |   |              |    |      |   |              |   |          |   |           |   |               |    |      |   |               |
| 5  | Marlboro                                                                                                                                                                                                                                                                                                                               |                                                                                                             |                                                                                                                                                                                                                                                                                                                                                                                         |   |                 |   |              |    |      |   |              |   |          |   |           |   |               |    |      |   |               |
| 6  | Pall Mall                                                                                                                                                                                                                                                                                                                              |                                                                                                             |                                                                                                                                                                                                                                                                                                                                                                                         |   |                 |   |              |    |      |   |              |   |          |   |           |   |               |    |      |   |               |
| 7  | Philip Morris                                                                                                                                                                                                                                                                                                                          |                                                                                                             |                                                                                                                                                                                                                                                                                                                                                                                         |   |                 |   |              |    |      |   |              |   |          |   |           |   |               |    |      |   |               |
| 99 | Otra                                                                                                                                                                                                                                                                                                                                   |                                                                                                             |                                                                                                                                                                                                                                                                                                                                                                                         |   |                 |   |              |    |      |   |              |   |          |   |           |   |               |    |      |   |               |
| 0  | Indeterminada                                                                                                                                                                                                                                                                                                                          |                                                                                                             |                                                                                                                                                                                                                                                                                                                                                                                         |   |                 |   |              |    |      |   |              |   |          |   |           |   |               |    |      |   |               |
| 80 | sotra_marca_cig<br>Mostrar el archivo SÓLO si:<br>[stabaco_marca]=99                                                                                                                                                                                                                                                                   | 11.1.- Otra marca de cigariillo:                                                                            | text                                                                                                                                                                                                                                                                                                                                                                                    |   |                 |   |              |    |      |   |              |   |          |   |           |   |               |    |      |   |               |
| 81 | sprograma_sn<br>Mostrar el archivo SÓLO si:<br>[sminuto]='0' and ([semision]='0' or ([stabaco_sn]='0' or [stabaco_sn]='2' or [stabaco_tipo]<>' or [stabaco_marca]<>'')) or ([sminuto]<>'0' and ([semision]='0' or ([stabaco_sn]='0' or [stabaco_sn]='2' or [stabaco_tipo]<>' or [stabaco_marca]<>'')) and [srespuestas_iguales]<>'1')) | 12.- En este minuto ¿ves o escuchas, aunque no sea en su totalidad (por al menos 10 segundos), un programa? | radio<br><table border="1"> <tr><td>1</td><td>Sí</td></tr> <tr><td>0</td><td>No</td></tr> </table>                                                                                                                                                                                                                                                                                      | 1 | Sí              | 0 | No           |    |      |   |              |   |          |   |           |   |               |    |      |   |               |
| 1  | Sí                                                                                                                                                                                                                                                                                                                                     |                                                                                                             |                                                                                                                                                                                                                                                                                                                                                                                         |   |                 |   |              |    |      |   |              |   |          |   |           |   |               |    |      |   |               |
| 0  | No                                                                                                                                                                                                                                                                                                                                     |                                                                                                             |                                                                                                                                                                                                                                                                                                                                                                                         |   |                 |   |              |    |      |   |              |   |          |   |           |   |               |    |      |   |               |
| 82 | snoyno<br>Mostrar el archivo SÓLO si:<br>[semision]='0' and [sprograma_sn]='0'                                                                                                                                                                                                                                                         | DEBES SELECCIONAR QUE VISTE UN ANUNCIO O UN PROGRAMA, NO ES POSIBLE QUE LA RESPUESTA SEA NEGATIVA A AMBOS.  | descriptive                                                                                                                                                                                                                                                                                                                                                                             |   |                 |   |              |    |      |   |              |   |          |   |           |   |               |    |      |   |               |
| 83 | smismo_programa<br>Mostrar el archivo SÓLO si:<br>[sprograma_sn]='1' AND [sminuto]<>'0'                                                                                                                                                                                                                                                | 13.- ¿el programa que ves en este minuto es el mismo que has observado en el minuto anterior?               | yesno<br><table border="1"> <tr><td>1</td><td>Si</td></tr> <tr><td>0</td><td>No</td></tr> </table>                                                                                                                                                                                                                                                                                      | 1 | Si              | 0 | No           |    |      |   |              |   |          |   |           |   |               |    |      |   |               |
| 1  | Si                                                                                                                                                                                                                                                                                                                                     |                                                                                                             |                                                                                                                                                                                                                                                                                                                                                                                         |   |                 |   |              |    |      |   |              |   |          |   |           |   |               |    |      |   |               |
| 0  | No                                                                                                                                                                                                                                                                                                                                     |                                                                                                             |                                                                                                                                                                                                                                                                                                                                                                                         |   |                 |   |              |    |      |   |              |   |          |   |           |   |               |    |      |   |               |
| 84 | snombre_prog<br>Mostrar el archivo SÓLO si:<br>[sprograma_sn]='1' and ([sminuto]='0' or [smismo_programa]='0')                                                                                                                                                                                                                         | 14.- ¿Qué nombre tiene el programa? (Debe responder esta pregunta CON mayúsculas, sin tildes sin símbolos)  | text, Required                                                                                                                                                                                                                                                                                                                                                                          |   |                 |   |              |    |      |   |              |   |          |   |           |   |               |    |      |   |               |
| 85 | sprograma_genero<br>Mostrar el archivo SÓLO si:<br>([sminuto]='0' and [sprograma_sn]='1') or ([sminuto]<>'0' and [srespuestas_iguales]<>'1' and [smismo_programa]='0' and [sprograma_sn]='1')                                                                                                                                          | 15.- ¿A que tipo de género corresponde el programa?                                                         | radio<br><table border="1"> <tr><td>1</td><td>Entretenimiento</td></tr> <tr><td>2</td><td>Informativos</td></tr> <tr><td>99</td><td>Otro</td></tr> </table>                                                                                                                                                                                                                             | 1 | Entretenimiento | 2 | Informativos | 99 | Otro |   |              |   |          |   |           |   |               |    |      |   |               |
| 1  | Entretenimiento                                                                                                                                                                                                                                                                                                                        |                                                                                                             |                                                                                                                                                                                                                                                                                                                                                                                         |   |                 |   |              |    |      |   |              |   |          |   |           |   |               |    |      |   |               |
| 2  | Informativos                                                                                                                                                                                                                                                                                                                           |                                                                                                             |                                                                                                                                                                                                                                                                                                                                                                                         |   |                 |   |              |    |      |   |              |   |          |   |           |   |               |    |      |   |               |
| 99 | Otro                                                                                                                                                                                                                                                                                                                                   |                                                                                                             |                                                                                                                                                                                                                                                                                                                                                                                         |   |                 |   |              |    |      |   |              |   |          |   |           |   |               |    |      |   |               |
| 86 | storpedo_continua                                                                                                                                                                                                                                                                                                                      | CONTINUAR REVISIÓN EN 35                                                                                    | descriptive<br>Field Annotation: @HIDDEN                                                                                                                                                                                                                                                                                                                                                |   |                 |   |              |    |      |   |              |   |          |   |           |   |               |    |      |   |               |

23/10/2020

FONIS TABACO V2.0 | REDCap

|            |                                                                                                                                                                                                    |                                                                                                                                        |                                                                                                                                                                                                                                                                                                                                                                                                                                                                                                                       |   |                |           |                                                 |            |                                                      |          |                        |   |              |   |          |   |             |   |          |   |         |    |                    |
|------------|----------------------------------------------------------------------------------------------------------------------------------------------------------------------------------------------------|----------------------------------------------------------------------------------------------------------------------------------------|-----------------------------------------------------------------------------------------------------------------------------------------------------------------------------------------------------------------------------------------------------------------------------------------------------------------------------------------------------------------------------------------------------------------------------------------------------------------------------------------------------------------------|---|----------------|-----------|-------------------------------------------------|------------|------------------------------------------------------|----------|------------------------|---|--------------|---|----------|---|-------------|---|----------|---|---------|----|--------------------|
| 87         | sprograma_subgenero<br>Mostrar el archivo SÓLO si:<br>[sprograma_genero]='1'                                                                                                                       | 16.- ¿Qué tipo de subgénero de entretenimiento es?                                                                                     | radio<br><table border="1"> <tr><td>1</td><td>Dibujo animado</td></tr> <tr><td>2</td><td>Película o telefilm no seriados (sin animación)</td></tr> <tr><td>3</td><td>Telenovelas (sin animación)</td></tr> <tr><td>4</td><td>Series (Sin animación)</td></tr> <tr><td>5</td><td>Reality show</td></tr> <tr><td>6</td><td>Concurso</td></tr> <tr><td>7</td><td>Humorístico</td></tr> <tr><td>8</td><td>Deportes</td></tr> <tr><td>9</td><td>Musical</td></tr> <tr><td>10</td><td>Variedades y otros</td></tr> </table> | 1 | Dibujo animado | 2         | Película o telefilm no seriados (sin animación) | 3          | Telenovelas (sin animación)                          | 4        | Series (Sin animación) | 5 | Reality show | 6 | Concurso | 7 | Humorístico | 8 | Deportes | 9 | Musical | 10 | Variedades y otros |
| 1          | Dibujo animado                                                                                                                                                                                     |                                                                                                                                        |                                                                                                                                                                                                                                                                                                                                                                                                                                                                                                                       |   |                |           |                                                 |            |                                                      |          |                        |   |              |   |          |   |             |   |          |   |         |    |                    |
| 2          | Película o telefilm no seriados (sin animación)                                                                                                                                                    |                                                                                                                                        |                                                                                                                                                                                                                                                                                                                                                                                                                                                                                                                       |   |                |           |                                                 |            |                                                      |          |                        |   |              |   |          |   |             |   |          |   |         |    |                    |
| 3          | Telenovelas (sin animación)                                                                                                                                                                        |                                                                                                                                        |                                                                                                                                                                                                                                                                                                                                                                                                                                                                                                                       |   |                |           |                                                 |            |                                                      |          |                        |   |              |   |          |   |             |   |          |   |         |    |                    |
| 4          | Series (Sin animación)                                                                                                                                                                             |                                                                                                                                        |                                                                                                                                                                                                                                                                                                                                                                                                                                                                                                                       |   |                |           |                                                 |            |                                                      |          |                        |   |              |   |          |   |             |   |          |   |         |    |                    |
| 5          | Reality show                                                                                                                                                                                       |                                                                                                                                        |                                                                                                                                                                                                                                                                                                                                                                                                                                                                                                                       |   |                |           |                                                 |            |                                                      |          |                        |   |              |   |          |   |             |   |          |   |         |    |                    |
| 6          | Concurso                                                                                                                                                                                           |                                                                                                                                        |                                                                                                                                                                                                                                                                                                                                                                                                                                                                                                                       |   |                |           |                                                 |            |                                                      |          |                        |   |              |   |          |   |             |   |          |   |         |    |                    |
| 7          | Humorístico                                                                                                                                                                                        |                                                                                                                                        |                                                                                                                                                                                                                                                                                                                                                                                                                                                                                                                       |   |                |           |                                                 |            |                                                      |          |                        |   |              |   |          |   |             |   |          |   |         |    |                    |
| 8          | Deportes                                                                                                                                                                                           |                                                                                                                                        |                                                                                                                                                                                                                                                                                                                                                                                                                                                                                                                       |   |                |           |                                                 |            |                                                      |          |                        |   |              |   |          |   |             |   |          |   |         |    |                    |
| 9          | Musical                                                                                                                                                                                            |                                                                                                                                        |                                                                                                                                                                                                                                                                                                                                                                                                                                                                                                                       |   |                |           |                                                 |            |                                                      |          |                        |   |              |   |          |   |             |   |          |   |         |    |                    |
| 10         | Variedades y otros                                                                                                                                                                                 |                                                                                                                                        |                                                                                                                                                                                                                                                                                                                                                                                                                                                                                                                       |   |                |           |                                                 |            |                                                      |          |                        |   |              |   |          |   |             |   |          |   |         |    |                    |
| 88         | sinformativo_tipo<br>Mostrar el archivo SÓLO si:<br>[sprograma_genero]='2'                                                                                                                         | 17.- ¿Qué tipo de subgénero informativo es?                                                                                            | radio<br><table border="1"> <tr><td>4</td><td>Noticiario</td></tr> <tr><td>Reportaje</td><td>documental, informes periodísticos y similares</td></tr> <tr><td>Entrevista</td><td>rueda informativa, conferencia de prensa y similares</td></tr> <tr><td>Coloquio</td><td>debate y similares</td></tr> <tr><td>5</td><td>Otro</td></tr> </table>                                                                                                                                                                       | 4 | Noticiario     | Reportaje | documental, informes periodísticos y similares  | Entrevista | rueda informativa, conferencia de prensa y similares | Coloquio | debate y similares     | 5 | Otro         |   |          |   |             |   |          |   |         |    |                    |
| 4          | Noticiario                                                                                                                                                                                         |                                                                                                                                        |                                                                                                                                                                                                                                                                                                                                                                                                                                                                                                                       |   |                |           |                                                 |            |                                                      |          |                        |   |              |   |          |   |             |   |          |   |         |    |                    |
| Reportaje  | documental, informes periodísticos y similares                                                                                                                                                     |                                                                                                                                        |                                                                                                                                                                                                                                                                                                                                                                                                                                                                                                                       |   |                |           |                                                 |            |                                                      |          |                        |   |              |   |          |   |             |   |          |   |         |    |                    |
| Entrevista | rueda informativa, conferencia de prensa y similares                                                                                                                                               |                                                                                                                                        |                                                                                                                                                                                                                                                                                                                                                                                                                                                                                                                       |   |                |           |                                                 |            |                                                      |          |                        |   |              |   |          |   |             |   |          |   |         |    |                    |
| Coloquio   | debate y similares                                                                                                                                                                                 |                                                                                                                                        |                                                                                                                                                                                                                                                                                                                                                                                                                                                                                                                       |   |                |           |                                                 |            |                                                      |          |                        |   |              |   |          |   |             |   |          |   |         |    |                    |
| 5          | Otro                                                                                                                                                                                               |                                                                                                                                        |                                                                                                                                                                                                                                                                                                                                                                                                                                                                                                                       |   |                |           |                                                 |            |                                                      |          |                        |   |              |   |          |   |             |   |          |   |         |    |                    |
| 89         | sprograma_otro_subgenero<br>Mostrar el archivo SÓLO si:<br>[sprograma_genero]='99'                                                                                                                 | 18.- Si es un programa de otro género ¿Qué tipo de subgénero es?                                                                       | radio<br><table border="1"> <tr><td>1</td><td>Educativo</td></tr> <tr><td>2</td><td>Estilo de vida</td></tr> <tr><td>3</td><td>Religión</td></tr> <tr><td>4</td><td>Otro</td></tr> </table>                                                                                                                                                                                                                                                                                                                           | 1 | Educativo      | 2         | Estilo de vida                                  | 3          | Religión                                             | 4        | Otro                   |   |              |   |          |   |             |   |          |   |         |    |                    |
| 1          | Educativo                                                                                                                                                                                          |                                                                                                                                        |                                                                                                                                                                                                                                                                                                                                                                                                                                                                                                                       |   |                |           |                                                 |            |                                                      |          |                        |   |              |   |          |   |             |   |          |   |         |    |                    |
| 2          | Estilo de vida                                                                                                                                                                                     |                                                                                                                                        |                                                                                                                                                                                                                                                                                                                                                                                                                                                                                                                       |   |                |           |                                                 |            |                                                      |          |                        |   |              |   |          |   |             |   |          |   |         |    |                    |
| 3          | Religión                                                                                                                                                                                           |                                                                                                                                        |                                                                                                                                                                                                                                                                                                                                                                                                                                                                                                                       |   |                |           |                                                 |            |                                                      |          |                        |   |              |   |          |   |             |   |          |   |         |    |                    |
| 4          | Otro                                                                                                                                                                                               |                                                                                                                                        |                                                                                                                                                                                                                                                                                                                                                                                                                                                                                                                       |   |                |           |                                                 |            |                                                      |          |                        |   |              |   |          |   |             |   |          |   |         |    |                    |
| 90         | sproduccion_chilena<br>Mostrar el archivo SÓLO si:<br>[sprograma_subgenero]<>" o<br>r [sinformativo_tipo]<>" or [s<br>programa_otro_subgenero]<<br>>"                                              | 19.- ¿El programa es una producción chilena?                                                                                           | radio<br><table border="1"> <tr><td>1</td><td>Sí</td></tr> <tr><td>0</td><td>No</td></tr> <tr><td>2</td><td>No se sabe</td></tr> </table>                                                                                                                                                                                                                                                                                                                                                                             | 1 | Sí             | 0         | No                                              | 2          | No se sabe                                           |          |                        |   |              |   |          |   |             |   |          |   |         |    |                    |
| 1          | Sí                                                                                                                                                                                                 |                                                                                                                                        |                                                                                                                                                                                                                                                                                                                                                                                                                                                                                                                       |   |                |           |                                                 |            |                                                      |          |                        |   |              |   |          |   |             |   |          |   |         |    |                    |
| 0          | No                                                                                                                                                                                                 |                                                                                                                                        |                                                                                                                                                                                                                                                                                                                                                                                                                                                                                                                       |   |                |           |                                                 |            |                                                      |          |                        |   |              |   |          |   |             |   |          |   |         |    |                    |
| 2          | No se sabe                                                                                                                                                                                         |                                                                                                                                        |                                                                                                                                                                                                                                                                                                                                                                                                                                                                                                                       |   |                |           |                                                 |            |                                                      |          |                        |   |              |   |          |   |             |   |          |   |         |    |                    |
| 91         | sen_espaniol<br>Mostrar el archivo SÓLO si:<br>[sproduccion_chilena]<>"                                                                                                                            | 20.- ¿El programa se escucha en español?                                                                                               | yesno<br><table border="1"> <tr><td>1</td><td>Si</td></tr> <tr><td>0</td><td>No</td></tr> </table>                                                                                                                                                                                                                                                                                                                                                                                                                    | 1 | Si             | 0         | No                                              |            |                                                      |          |                        |   |              |   |          |   |             |   |          |   |         |    |                    |
| 1          | Si                                                                                                                                                                                                 |                                                                                                                                        |                                                                                                                                                                                                                                                                                                                                                                                                                                                                                                                       |   |                |           |                                                 |            |                                                      |          |                        |   |              |   |          |   |             |   |          |   |         |    |                    |
| 0          | No                                                                                                                                                                                                 |                                                                                                                                        |                                                                                                                                                                                                                                                                                                                                                                                                                                                                                                                       |   |                |           |                                                 |            |                                                      |          |                        |   |              |   |          |   |             |   |          |   |         |    |                    |
| 92         | stabaco_explicito<br>Mostrar el archivo SÓLO si:<br>([sminuto]='0' and [sen_espa<br>niol]<>" ) or ([sminuto]<>'0' an<br>d [smismo_programa]='1') or<br>([sminuto]<>'0' and [sen_espa<br>niol]<>" ) | 21.- ¿Observa el uso explícito de tabaco en este minuto?                                                                               | yesno<br><table border="1"> <tr><td>1</td><td>Si</td></tr> <tr><td>0</td><td>No</td></tr> </table>                                                                                                                                                                                                                                                                                                                                                                                                                    | 1 | Si             | 0         | No                                              |            |                                                      |          |                        |   |              |   |          |   |             |   |          |   |         |    |                    |
| 1          | Si                                                                                                                                                                                                 |                                                                                                                                        |                                                                                                                                                                                                                                                                                                                                                                                                                                                                                                                       |   |                |           |                                                 |            |                                                      |          |                        |   |              |   |          |   |             |   |          |   |         |    |                    |
| 0          | No                                                                                                                                                                                                 |                                                                                                                                        |                                                                                                                                                                                                                                                                                                                                                                                                                                                                                                                       |   |                |           |                                                 |            |                                                      |          |                        |   |              |   |          |   |             |   |          |   |         |    |                    |
| 93         | stabaco_personas_cant<br>Mostrar el archivo SÓLO si:<br>[stabaco_explicito]='1'                                                                                                                    | 22.- ¿Cuántas personas o personajes usan tabaco explícitamente en este minuto?<br><i>SI SON TRES O MÁS ELIJA A LOS DOS PRINCIPALES</i> | radio<br><table border="1"> <tr><td>1</td><td>1</td></tr> <tr><td>2</td><td>2 o más</td></tr> </table>                                                                                                                                                                                                                                                                                                                                                                                                                | 1 | 1              | 2         | 2 o más                                         |            |                                                      |          |                        |   |              |   |          |   |             |   |          |   |         |    |                    |
| 1          | 1                                                                                                                                                                                                  |                                                                                                                                        |                                                                                                                                                                                                                                                                                                                                                                                                                                                                                                                       |   |                |           |                                                 |            |                                                      |          |                        |   |              |   |          |   |             |   |          |   |         |    |                    |
| 2          | 2 o más                                                                                                                                                                                            |                                                                                                                                        |                                                                                                                                                                                                                                                                                                                                                                                                                                                                                                                       |   |                |           |                                                 |            |                                                      |          |                        |   |              |   |          |   |             |   |          |   |         |    |                    |
| 94         | stxt_personaje_1<br>Mostrar el archivo SÓLO si:<br>[stabaco_personas_cant]='1'<br>or [stabaco_personas_cant]<br>='2'                                                                               | Personaje 1                                                                                                                            | descriptive                                                                                                                                                                                                                                                                                                                                                                                                                                                                                                           |   |                |           |                                                 |            |                                                      |          |                        |   |              |   |          |   |             |   |          |   |         |    |                    |
| 95         | snombre_personaje<br>Mostrar el archivo SÓLO si:<br>[stabaco_personas_cant]='1'<br>or [stabaco_personas_cant]<br>='2'                                                                              | 23.- ¿Cómo se llama el personaje? (debe responder esta pregunta CON mayúsculas, sin tilde y sin símbolos).                             | text                                                                                                                                                                                                                                                                                                                                                                                                                                                                                                                  |   |                |           |                                                 |            |                                                      |          |                        |   |              |   |          |   |             |   |          |   |         |    |                    |

23/10/2020

FONIS TABACO V2.0 | REDCap

|     |                                                                                                                                                               |                                                                                      |                                                                                                                                                                                                                                                                                                                                                                                                                                                                                                                                                                                                                                                                                                          |   |                                       |   |                                  |   |                                  |   |                                          |   |                                                        |    |                                |   |                           |   |                                                  |   |                                         |    |                        |
|-----|---------------------------------------------------------------------------------------------------------------------------------------------------------------|--------------------------------------------------------------------------------------|----------------------------------------------------------------------------------------------------------------------------------------------------------------------------------------------------------------------------------------------------------------------------------------------------------------------------------------------------------------------------------------------------------------------------------------------------------------------------------------------------------------------------------------------------------------------------------------------------------------------------------------------------------------------------------------------------------|---|---------------------------------------|---|----------------------------------|---|----------------------------------|---|------------------------------------------|---|--------------------------------------------------------|----|--------------------------------|---|---------------------------|---|--------------------------------------------------|---|-----------------------------------------|----|------------------------|
| 96  | stabaco_tipo_p1<br><br>Mostrar el archivo SÓLO si:<br>[stabaco_personas_cant]='1'<br>or [stabaco_personas_cant]<br>='2'                                       | 24.- ¿Qué tipo de tabaco usa la persona o personaje en pantalla durante este minuto? | radio<br><table border="1"> <tr><td>1</td><td>Cigarrillo</td></tr> <tr><td>2</td><td>Cigarro-puro</td></tr> <tr><td>3</td><td>Pipa</td></tr> <tr><td>4</td><td>Pipa de agua</td></tr> <tr><td>5</td><td>Vaporizador</td></tr> <tr><td>99</td><td>Otro producto de tabaco</td></tr> </table>                                                                                                                                                                                                                                                                                                                                                                                                              | 1 | Cigarrillo                            | 2 | Cigarro-puro                     | 3 | Pipa                             | 4 | Pipa de agua                             | 5 | Vaporizador                                            | 99 | Otro producto de tabaco        |   |                           |   |                                                  |   |                                         |    |                        |
| 1   | Cigarrillo                                                                                                                                                    |                                                                                      |                                                                                                                                                                                                                                                                                                                                                                                                                                                                                                                                                                                                                                                                                                          |   |                                       |   |                                  |   |                                  |   |                                          |   |                                                        |    |                                |   |                           |   |                                                  |   |                                         |    |                        |
| 2   | Cigarro-puro                                                                                                                                                  |                                                                                      |                                                                                                                                                                                                                                                                                                                                                                                                                                                                                                                                                                                                                                                                                                          |   |                                       |   |                                  |   |                                  |   |                                          |   |                                                        |    |                                |   |                           |   |                                                  |   |                                         |    |                        |
| 3   | Pipa                                                                                                                                                          |                                                                                      |                                                                                                                                                                                                                                                                                                                                                                                                                                                                                                                                                                                                                                                                                                          |   |                                       |   |                                  |   |                                  |   |                                          |   |                                                        |    |                                |   |                           |   |                                                  |   |                                         |    |                        |
| 4   | Pipa de agua                                                                                                                                                  |                                                                                      |                                                                                                                                                                                                                                                                                                                                                                                                                                                                                                                                                                                                                                                                                                          |   |                                       |   |                                  |   |                                  |   |                                          |   |                                                        |    |                                |   |                           |   |                                                  |   |                                         |    |                        |
| 5   | Vaporizador                                                                                                                                                   |                                                                                      |                                                                                                                                                                                                                                                                                                                                                                                                                                                                                                                                                                                                                                                                                                          |   |                                       |   |                                  |   |                                  |   |                                          |   |                                                        |    |                                |   |                           |   |                                                  |   |                                         |    |                        |
| 99  | Otro producto de tabaco                                                                                                                                       |                                                                                      |                                                                                                                                                                                                                                                                                                                                                                                                                                                                                                                                                                                                                                                                                                          |   |                                       |   |                                  |   |                                  |   |                                          |   |                                                        |    |                                |   |                           |   |                                                  |   |                                         |    |                        |
| 97  | spapel_p1<br><br>Mostrar el archivo SÓLO si:<br>[stabaco_personas_cant]='1'<br>or [stabaco_personas_cant]<br>='2'                                             | 25.- ¿Qué papel tiene el personaje en la trama?                                      | radio<br><table border="1"> <tr><td>1</td><td>Principal</td></tr> <tr><td>2</td><td>Secundario</td></tr> <tr><td>3</td><td>Terciario o extra</td></tr> <tr><td>4</td><td>No se puede determinar</td></tr> </table>                                                                                                                                                                                                                                                                                                                                                                                                                                                                                       | 1 | Principal                             | 2 | Secundario                       | 3 | Terciario o extra                | 4 | No se puede determinar                   |   |                                                        |    |                                |   |                           |   |                                                  |   |                                         |    |                        |
| 1   | Principal                                                                                                                                                     |                                                                                      |                                                                                                                                                                                                                                                                                                                                                                                                                                                                                                                                                                                                                                                                                                          |   |                                       |   |                                  |   |                                  |   |                                          |   |                                                        |    |                                |   |                           |   |                                                  |   |                                         |    |                        |
| 2   | Secundario                                                                                                                                                    |                                                                                      |                                                                                                                                                                                                                                                                                                                                                                                                                                                                                                                                                                                                                                                                                                          |   |                                       |   |                                  |   |                                  |   |                                          |   |                                                        |    |                                |   |                           |   |                                                  |   |                                         |    |                        |
| 3   | Terciario o extra                                                                                                                                             |                                                                                      |                                                                                                                                                                                                                                                                                                                                                                                                                                                                                                                                                                                                                                                                                                          |   |                                       |   |                                  |   |                                  |   |                                          |   |                                                        |    |                                |   |                           |   |                                                  |   |                                         |    |                        |
| 4   | No se puede determinar                                                                                                                                        |                                                                                      |                                                                                                                                                                                                                                                                                                                                                                                                                                                                                                                                                                                                                                                                                                          |   |                                       |   |                                  |   |                                  |   |                                          |   |                                                        |    |                                |   |                           |   |                                                  |   |                                         |    |                        |
| 98  | sedad_p1<br><br>Mostrar el archivo SÓLO si:<br>[stabaco_personas_cant]='1'<br>or [stabaco_personas_cant]<br>='2'                                              | 26.- ¿Qué edad parece tener el personaje?                                            | radio<br><table border="1"> <tr><td>1</td><td>Menor de edad &gt;18</td></tr> <tr><td>2</td><td>Adulto joven 18-39</td></tr> <tr><td>3</td><td>Adulto maduro 40-64</td></tr> <tr><td>4</td><td>Adulto mayor 65+</td></tr> <tr><td>5</td><td>No se puede determinar</td></tr> </table>                                                                                                                                                                                                                                                                                                                                                                                                                     | 1 | Menor de edad >18                     | 2 | Adulto joven 18-39               | 3 | Adulto maduro 40-64              | 4 | Adulto mayor 65+                         | 5 | No se puede determinar                                 |    |                                |   |                           |   |                                                  |   |                                         |    |                        |
| 1   | Menor de edad >18                                                                                                                                             |                                                                                      |                                                                                                                                                                                                                                                                                                                                                                                                                                                                                                                                                                                                                                                                                                          |   |                                       |   |                                  |   |                                  |   |                                          |   |                                                        |    |                                |   |                           |   |                                                  |   |                                         |    |                        |
| 2   | Adulto joven 18-39                                                                                                                                            |                                                                                      |                                                                                                                                                                                                                                                                                                                                                                                                                                                                                                                                                                                                                                                                                                          |   |                                       |   |                                  |   |                                  |   |                                          |   |                                                        |    |                                |   |                           |   |                                                  |   |                                         |    |                        |
| 3   | Adulto maduro 40-64                                                                                                                                           |                                                                                      |                                                                                                                                                                                                                                                                                                                                                                                                                                                                                                                                                                                                                                                                                                          |   |                                       |   |                                  |   |                                  |   |                                          |   |                                                        |    |                                |   |                           |   |                                                  |   |                                         |    |                        |
| 4   | Adulto mayor 65+                                                                                                                                              |                                                                                      |                                                                                                                                                                                                                                                                                                                                                                                                                                                                                                                                                                                                                                                                                                          |   |                                       |   |                                  |   |                                  |   |                                          |   |                                                        |    |                                |   |                           |   |                                                  |   |                                         |    |                        |
| 5   | No se puede determinar                                                                                                                                        |                                                                                      |                                                                                                                                                                                                                                                                                                                                                                                                                                                                                                                                                                                                                                                                                                          |   |                                       |   |                                  |   |                                  |   |                                          |   |                                                        |    |                                |   |                           |   |                                                  |   |                                         |    |                        |
| 99  | ssexo_biologico_p1<br><br>Mostrar el archivo SÓLO si:<br>[stabaco_personas_cant]='1'<br>or [stabaco_personas_cant]<br>='2'                                    | 27.- ¿Qué sexo biológico parecer tener el personaje?                                 | radio<br><table border="1"> <tr><td>1</td><td>Hombre</td></tr> <tr><td>2</td><td>Mujer</td></tr> <tr><td>3</td><td>No se puede determinar</td></tr> </table>                                                                                                                                                                                                                                                                                                                                                                                                                                                                                                                                             | 1 | Hombre                                | 2 | Mujer                            | 3 | No se puede determinar           |   |                                          |   |                                                        |    |                                |   |                           |   |                                                  |   |                                         |    |                        |
| 1   | Hombre                                                                                                                                                        |                                                                                      |                                                                                                                                                                                                                                                                                                                                                                                                                                                                                                                                                                                                                                                                                                          |   |                                       |   |                                  |   |                                  |   |                                          |   |                                                        |    |                                |   |                           |   |                                                  |   |                                         |    |                        |
| 2   | Mujer                                                                                                                                                         |                                                                                      |                                                                                                                                                                                                                                                                                                                                                                                                                                                                                                                                                                                                                                                                                                          |   |                                       |   |                                  |   |                                  |   |                                          |   |                                                        |    |                                |   |                           |   |                                                  |   |                                         |    |                        |
| 3   | No se puede determinar                                                                                                                                        |                                                                                      |                                                                                                                                                                                                                                                                                                                                                                                                                                                                                                                                                                                                                                                                                                          |   |                                       |   |                                  |   |                                  |   |                                          |   |                                                        |    |                                |   |                           |   |                                                  |   |                                         |    |                        |
| 100 | suso_contexto_fisico_p1<br><br>Mostrar el archivo SÓLO si:<br>[stabaco_personas_cant]='1'<br>or [stabaco_personas_cant]<br>='2'                               | 28.- ¿En qué ambiente físico usa tabaco el personaje en este minuto?                 | radio<br><table border="1"> <tr><td>1</td><td>En ambiente cerrado</td></tr> <tr><td>2</td><td>En ambiente semiabierto</td></tr> <tr><td>3</td><td>En ambiente abierto</td></tr> <tr><td>4</td><td>No se puede determinar</td></tr> </table>                                                                                                                                                                                                                                                                                                                                                                                                                                                              | 1 | En ambiente cerrado                   | 2 | En ambiente semiabierto          | 3 | En ambiente abierto              | 4 | No se puede determinar                   |   |                                                        |    |                                |   |                           |   |                                                  |   |                                         |    |                        |
| 1   | En ambiente cerrado                                                                                                                                           |                                                                                      |                                                                                                                                                                                                                                                                                                                                                                                                                                                                                                                                                                                                                                                                                                          |   |                                       |   |                                  |   |                                  |   |                                          |   |                                                        |    |                                |   |                           |   |                                                  |   |                                         |    |                        |
| 2   | En ambiente semiabierto                                                                                                                                       |                                                                                      |                                                                                                                                                                                                                                                                                                                                                                                                                                                                                                                                                                                                                                                                                                          |   |                                       |   |                                  |   |                                  |   |                                          |   |                                                        |    |                                |   |                           |   |                                                  |   |                                         |    |                        |
| 3   | En ambiente abierto                                                                                                                                           |                                                                                      |                                                                                                                                                                                                                                                                                                                                                                                                                                                                                                                                                                                                                                                                                                          |   |                                       |   |                                  |   |                                  |   |                                          |   |                                                        |    |                                |   |                           |   |                                                  |   |                                         |    |                        |
| 4   | No se puede determinar                                                                                                                                        |                                                                                      |                                                                                                                                                                                                                                                                                                                                                                                                                                                                                                                                                                                                                                                                                                          |   |                                       |   |                                  |   |                                  |   |                                          |   |                                                        |    |                                |   |                           |   |                                                  |   |                                         |    |                        |
| 101 | stipo_local<br><br>Mostrar el archivo SÓLO si:<br>[suso_contexto_fisico_p1]<<br>>'3' and ([stabaco_personas_c<br>ant]='1' or [stabaco_personas<br>_cant]='2') | 29.- ¿En qué tipo de local usa tabaco el personaje en este minuto?                   | radio<br><table border="1"> <tr><td>1</td><td>En un hogar</td></tr> <tr><td>2</td><td>En un hotel o residencia</td></tr> <tr><td>3</td><td>En un bar, restaurante o similar</td></tr> <tr><td>4</td><td>En un establecimiento educativo superior</td></tr> <tr><td>5</td><td>En un establecimiento educativo de básica o secundaria</td></tr> <tr><td>6</td><td>En un establecimiento de salud</td></tr> <tr><td>7</td><td>En un medio de transporte</td></tr> <tr><td>8</td><td>En un lugar de trabajo no incluido anteriormente</td></tr> <tr><td>9</td><td>En otro lugar no incluido anteriormente</td></tr> <tr><td>10</td><td>No se puede determinar</td></tr> </table><br>alineación de encargo LV | 1 | En un hogar                           | 2 | En un hotel o residencia         | 3 | En un bar, restaurante o similar | 4 | En un establecimiento educativo superior | 5 | En un establecimiento educativo de básica o secundaria | 6  | En un establecimiento de salud | 7 | En un medio de transporte | 8 | En un lugar de trabajo no incluido anteriormente | 9 | En otro lugar no incluido anteriormente | 10 | No se puede determinar |
| 1   | En un hogar                                                                                                                                                   |                                                                                      |                                                                                                                                                                                                                                                                                                                                                                                                                                                                                                                                                                                                                                                                                                          |   |                                       |   |                                  |   |                                  |   |                                          |   |                                                        |    |                                |   |                           |   |                                                  |   |                                         |    |                        |
| 2   | En un hotel o residencia                                                                                                                                      |                                                                                      |                                                                                                                                                                                                                                                                                                                                                                                                                                                                                                                                                                                                                                                                                                          |   |                                       |   |                                  |   |                                  |   |                                          |   |                                                        |    |                                |   |                           |   |                                                  |   |                                         |    |                        |
| 3   | En un bar, restaurante o similar                                                                                                                              |                                                                                      |                                                                                                                                                                                                                                                                                                                                                                                                                                                                                                                                                                                                                                                                                                          |   |                                       |   |                                  |   |                                  |   |                                          |   |                                                        |    |                                |   |                           |   |                                                  |   |                                         |    |                        |
| 4   | En un establecimiento educativo superior                                                                                                                      |                                                                                      |                                                                                                                                                                                                                                                                                                                                                                                                                                                                                                                                                                                                                                                                                                          |   |                                       |   |                                  |   |                                  |   |                                          |   |                                                        |    |                                |   |                           |   |                                                  |   |                                         |    |                        |
| 5   | En un establecimiento educativo de básica o secundaria                                                                                                        |                                                                                      |                                                                                                                                                                                                                                                                                                                                                                                                                                                                                                                                                                                                                                                                                                          |   |                                       |   |                                  |   |                                  |   |                                          |   |                                                        |    |                                |   |                           |   |                                                  |   |                                         |    |                        |
| 6   | En un establecimiento de salud                                                                                                                                |                                                                                      |                                                                                                                                                                                                                                                                                                                                                                                                                                                                                                                                                                                                                                                                                                          |   |                                       |   |                                  |   |                                  |   |                                          |   |                                                        |    |                                |   |                           |   |                                                  |   |                                         |    |                        |
| 7   | En un medio de transporte                                                                                                                                     |                                                                                      |                                                                                                                                                                                                                                                                                                                                                                                                                                                                                                                                                                                                                                                                                                          |   |                                       |   |                                  |   |                                  |   |                                          |   |                                                        |    |                                |   |                           |   |                                                  |   |                                         |    |                        |
| 8   | En un lugar de trabajo no incluido anteriormente                                                                                                              |                                                                                      |                                                                                                                                                                                                                                                                                                                                                                                                                                                                                                                                                                                                                                                                                                          |   |                                       |   |                                  |   |                                  |   |                                          |   |                                                        |    |                                |   |                           |   |                                                  |   |                                         |    |                        |
| 9   | En otro lugar no incluido anteriormente                                                                                                                       |                                                                                      |                                                                                                                                                                                                                                                                                                                                                                                                                                                                                                                                                                                                                                                                                                          |   |                                       |   |                                  |   |                                  |   |                                          |   |                                                        |    |                                |   |                           |   |                                                  |   |                                         |    |                        |
| 10  | No se puede determinar                                                                                                                                        |                                                                                      |                                                                                                                                                                                                                                                                                                                                                                                                                                                                                                                                                                                                                                                                                                          |   |                                       |   |                                  |   |                                  |   |                                          |   |                                                        |    |                                |   |                           |   |                                                  |   |                                         |    |                        |
| 102 | stabaco_solo_o<br><br>Mostrar el archivo SÓLO si:<br>[stabaco_personas_cant]='1'<br>or [stabaco_personas_cant]<br>='2'                                        | 30.- En este minuto ¿El personaje usa tabaco en presencia de otros?                  | radio<br><table border="1"> <tr><td>1</td><td>Sí, en presencia de uno o más menores</td></tr> <tr><td>2</td><td>Sí, en presencia sólo de adultos</td></tr> <tr><td>0</td><td>No</td></tr> <tr><td>4</td><td>No se puede determinar</td></tr> </table><br>alineación de encargo LV                                                                                                                                                                                                                                                                                                                                                                                                                        | 1 | Sí, en presencia de uno o más menores | 2 | Sí, en presencia sólo de adultos | 0 | No                               | 4 | No se puede determinar                   |   |                                                        |    |                                |   |                           |   |                                                  |   |                                         |    |                        |
| 1   | Sí, en presencia de uno o más menores                                                                                                                         |                                                                                      |                                                                                                                                                                                                                                                                                                                                                                                                                                                                                                                                                                                                                                                                                                          |   |                                       |   |                                  |   |                                  |   |                                          |   |                                                        |    |                                |   |                           |   |                                                  |   |                                         |    |                        |
| 2   | Sí, en presencia sólo de adultos                                                                                                                              |                                                                                      |                                                                                                                                                                                                                                                                                                                                                                                                                                                                                                                                                                                                                                                                                                          |   |                                       |   |                                  |   |                                  |   |                                          |   |                                                        |    |                                |   |                           |   |                                                  |   |                                         |    |                        |
| 0   | No                                                                                                                                                            |                                                                                      |                                                                                                                                                                                                                                                                                                                                                                                                                                                                                                                                                                                                                                                                                                          |   |                                       |   |                                  |   |                                  |   |                                          |   |                                                        |    |                                |   |                           |   |                                                  |   |                                         |    |                        |
| 4   | No se puede determinar                                                                                                                                        |                                                                                      |                                                                                                                                                                                                                                                                                                                                                                                                                                                                                                                                                                                                                                                                                                          |   |                                       |   |                                  |   |                                  |   |                                          |   |                                                        |    |                                |   |                           |   |                                                  |   |                                         |    |                        |

23/10/2020

FONIS TABACO V2.0 | REDCap

|     |                                                                                                                |                                                                                                                                                                                                                                                            |                                                                                                                                                                                                                                                                                                                                                                                                                                                                                                                                                                                                                                                                                                                                                                                                                                                                                                                                                                        |   |                   |                                                                     |                    |                   |                                                                        |   |                        |                                                                          |                        |                   |                                                                                                                             |   |                   |                                       |   |                   |                                                                 |   |                   |                        |
|-----|----------------------------------------------------------------------------------------------------------------|------------------------------------------------------------------------------------------------------------------------------------------------------------------------------------------------------------------------------------------------------------|------------------------------------------------------------------------------------------------------------------------------------------------------------------------------------------------------------------------------------------------------------------------------------------------------------------------------------------------------------------------------------------------------------------------------------------------------------------------------------------------------------------------------------------------------------------------------------------------------------------------------------------------------------------------------------------------------------------------------------------------------------------------------------------------------------------------------------------------------------------------------------------------------------------------------------------------------------------------|---|-------------------|---------------------------------------------------------------------|--------------------|-------------------|------------------------------------------------------------------------|---|------------------------|--------------------------------------------------------------------------|------------------------|-------------------|-----------------------------------------------------------------------------------------------------------------------------|---|-------------------|---------------------------------------|---|-------------------|-----------------------------------------------------------------|---|-------------------|------------------------|
| 103 | sno_fumadores_p1<br>Mostrar el archivo SÓLO si:<br>[stabaco_personas_cant]='2'                                 | 31.- ¿Fuman todos los presentes?                                                                                                                                                                                                                           | yesno<br><table border="1"> <tr> <td>1</td> <td>Si</td> </tr> <tr> <td>0</td> <td>No</td> </tr> </table>                                                                                                                                                                                                                                                                                                                                                                                                                                                                                                                                                                                                                                                                                                                                                                                                                                                               | 1 | Si                | 0                                                                   | No                 |                   |                                                                        |   |                        |                                                                          |                        |                   |                                                                                                                             |   |                   |                                       |   |                   |                                                                 |   |                   |                        |
| 1   | Si                                                                                                             |                                                                                                                                                                                                                                                            |                                                                                                                                                                                                                                                                                                                                                                                                                                                                                                                                                                                                                                                                                                                                                                                                                                                                                                                                                                        |   |                   |                                                                     |                    |                   |                                                                        |   |                        |                                                                          |                        |                   |                                                                                                                             |   |                   |                                       |   |                   |                                                                 |   |                   |                        |
| 0   | No                                                                                                             |                                                                                                                                                                                                                                                            |                                                                                                                                                                                                                                                                                                                                                                                                                                                                                                                                                                                                                                                                                                                                                                                                                                                                                                                                                                        |   |                   |                                                                     |                    |                   |                                                                        |   |                        |                                                                          |                        |                   |                                                                                                                             |   |                   |                                       |   |                   |                                                                 |   |                   |                        |
| 104 | stabaco_motivo<br>Mostrar el archivo SÓLO si:<br>[stabaco_personas_cant]='1'<br>or [stabaco_personas_cant]='2' | 32.- Por lo que ha visto u oído hasta este minuto en este programa ¿Cuál cree que es él o los motivos principales por el que personaje usa o justifica el uso de tabaco? (Seleccione máximo dos alternativas)<br><i>Seleccione máximo dos alternativas</i> | checkbox<br><table border="1"> <tr> <td>1</td> <td>stabaco_motivo__1</td> <td>como cuestionamiento o rebeldía frente a las instituciones sociales</td> </tr> <tr> <td>2</td> <td>stabaco_motivo__2</td> <td>como mecanismo para socializar o intercambiar experiencias entre pares</td> </tr> <tr> <td>3</td> <td>stabaco_motivo__3</td> <td>porque muchos lo hacen o lo hacían en su entorno familiar o de amistades</td> </tr> <tr> <td>4</td> <td>stabaco_motivo__4</td> <td>para proyectar una imagen ideal, glamour, encanto, éxito, o poder o para identificarse con personas o personajes que admira</td> </tr> <tr> <td>5</td> <td>stabaco_motivo__5</td> <td>como signo de madurez e independencia</td> </tr> <tr> <td>6</td> <td>stabaco_motivo__6</td> <td>para obtener placer, divertirse, o para hacer frente al estrés.</td> </tr> <tr> <td>7</td> <td>stabaco_motivo__7</td> <td>No se puede determinar</td> </tr> </table><br>alineación de encargo LV | 1 | stabaco_motivo__1 | como cuestionamiento o rebeldía frente a las instituciones sociales | 2                  | stabaco_motivo__2 | como mecanismo para socializar o intercambiar experiencias entre pares | 3 | stabaco_motivo__3      | porque muchos lo hacen o lo hacían en su entorno familiar o de amistades | 4                      | stabaco_motivo__4 | para proyectar una imagen ideal, glamour, encanto, éxito, o poder o para identificarse con personas o personajes que admira | 5 | stabaco_motivo__5 | como signo de madurez e independencia | 6 | stabaco_motivo__6 | para obtener placer, divertirse, o para hacer frente al estrés. | 7 | stabaco_motivo__7 | No se puede determinar |
| 1   | stabaco_motivo__1                                                                                              | como cuestionamiento o rebeldía frente a las instituciones sociales                                                                                                                                                                                        |                                                                                                                                                                                                                                                                                                                                                                                                                                                                                                                                                                                                                                                                                                                                                                                                                                                                                                                                                                        |   |                   |                                                                     |                    |                   |                                                                        |   |                        |                                                                          |                        |                   |                                                                                                                             |   |                   |                                       |   |                   |                                                                 |   |                   |                        |
| 2   | stabaco_motivo__2                                                                                              | como mecanismo para socializar o intercambiar experiencias entre pares                                                                                                                                                                                     |                                                                                                                                                                                                                                                                                                                                                                                                                                                                                                                                                                                                                                                                                                                                                                                                                                                                                                                                                                        |   |                   |                                                                     |                    |                   |                                                                        |   |                        |                                                                          |                        |                   |                                                                                                                             |   |                   |                                       |   |                   |                                                                 |   |                   |                        |
| 3   | stabaco_motivo__3                                                                                              | porque muchos lo hacen o lo hacían en su entorno familiar o de amistades                                                                                                                                                                                   |                                                                                                                                                                                                                                                                                                                                                                                                                                                                                                                                                                                                                                                                                                                                                                                                                                                                                                                                                                        |   |                   |                                                                     |                    |                   |                                                                        |   |                        |                                                                          |                        |                   |                                                                                                                             |   |                   |                                       |   |                   |                                                                 |   |                   |                        |
| 4   | stabaco_motivo__4                                                                                              | para proyectar una imagen ideal, glamour, encanto, éxito, o poder o para identificarse con personas o personajes que admira                                                                                                                                |                                                                                                                                                                                                                                                                                                                                                                                                                                                                                                                                                                                                                                                                                                                                                                                                                                                                                                                                                                        |   |                   |                                                                     |                    |                   |                                                                        |   |                        |                                                                          |                        |                   |                                                                                                                             |   |                   |                                       |   |                   |                                                                 |   |                   |                        |
| 5   | stabaco_motivo__5                                                                                              | como signo de madurez e independencia                                                                                                                                                                                                                      |                                                                                                                                                                                                                                                                                                                                                                                                                                                                                                                                                                                                                                                                                                                                                                                                                                                                                                                                                                        |   |                   |                                                                     |                    |                   |                                                                        |   |                        |                                                                          |                        |                   |                                                                                                                             |   |                   |                                       |   |                   |                                                                 |   |                   |                        |
| 6   | stabaco_motivo__6                                                                                              | para obtener placer, divertirse, o para hacer frente al estrés.                                                                                                                                                                                            |                                                                                                                                                                                                                                                                                                                                                                                                                                                                                                                                                                                                                                                                                                                                                                                                                                                                                                                                                                        |   |                   |                                                                     |                    |                   |                                                                        |   |                        |                                                                          |                        |                   |                                                                                                                             |   |                   |                                       |   |                   |                                                                 |   |                   |                        |
| 7   | stabaco_motivo__7                                                                                              | No se puede determinar                                                                                                                                                                                                                                     |                                                                                                                                                                                                                                                                                                                                                                                                                                                                                                                                                                                                                                                                                                                                                                                                                                                                                                                                                                        |   |                   |                                                                     |                    |                   |                                                                        |   |                        |                                                                          |                        |                   |                                                                                                                             |   |                   |                                       |   |                   |                                                                 |   |                   |                        |
| 105 | storpado_2                                                                                                     | TORPEDO: REALIZAR LOS CAMBIOS AL PERSONAJE 2                                                                                                                                                                                                               | radio<br>alineación de encargo LV<br>Field Annotation: @HIDDEN                                                                                                                                                                                                                                                                                                                                                                                                                                                                                                                                                                                                                                                                                                                                                                                                                                                                                                         |   |                   |                                                                     |                    |                   |                                                                        |   |                        |                                                                          |                        |                   |                                                                                                                             |   |                   |                                       |   |                   |                                                                 |   |                   |                        |
| 106 | stxt_personaje_2<br>Mostrar el archivo SÓLO si:<br>[tabaco_personas_cant]='2'                                  | Personaje 2                                                                                                                                                                                                                                                | descriptive                                                                                                                                                                                                                                                                                                                                                                                                                                                                                                                                                                                                                                                                                                                                                                                                                                                                                                                                                            |   |                   |                                                                     |                    |                   |                                                                        |   |                        |                                                                          |                        |                   |                                                                                                                             |   |                   |                                       |   |                   |                                                                 |   |                   |                        |
| 107 | snombre_personaje_2<br>Mostrar el archivo SÓLO si:<br>[stabaco_personas_cant]='2'                              | 33.- ¿Cómo se llama el personaje?, (debe responder esta pregunta CON mayúsculas, sin tilde y sin símbolos).                                                                                                                                                | text                                                                                                                                                                                                                                                                                                                                                                                                                                                                                                                                                                                                                                                                                                                                                                                                                                                                                                                                                                   |   |                   |                                                                     |                    |                   |                                                                        |   |                        |                                                                          |                        |                   |                                                                                                                             |   |                   |                                       |   |                   |                                                                 |   |                   |                        |
| 108 | stabaco_tipo_p2<br>Mostrar el archivo SÓLO si:<br>[tabaco_personas_cant]='2'                                   | 34.- ¿Qué tipo de tabaco usa la persona o personaje en pantalla durante este minuto?                                                                                                                                                                       | radio<br><table border="1"> <tr> <td>1</td> <td>Cigarrillo</td> </tr> <tr> <td>2</td> <td>Cigarro-puro</td> </tr> <tr> <td>3</td> <td>Pipa</td> </tr> <tr> <td>4</td> <td>Pipa de agua</td> </tr> <tr> <td>5</td> <td>Vaporizador</td> </tr> <tr> <td>99</td> <td>Otro producto de tabaco</td> </tr> </table>                                                                                                                                                                                                                                                                                                                                                                                                                                                                                                                                                                                                                                                          | 1 | Cigarrillo        | 2                                                                   | Cigarro-puro       | 3                 | Pipa                                                                   | 4 | Pipa de agua           | 5                                                                        | Vaporizador            | 99                | Otro producto de tabaco                                                                                                     |   |                   |                                       |   |                   |                                                                 |   |                   |                        |
| 1   | Cigarrillo                                                                                                     |                                                                                                                                                                                                                                                            |                                                                                                                                                                                                                                                                                                                                                                                                                                                                                                                                                                                                                                                                                                                                                                                                                                                                                                                                                                        |   |                   |                                                                     |                    |                   |                                                                        |   |                        |                                                                          |                        |                   |                                                                                                                             |   |                   |                                       |   |                   |                                                                 |   |                   |                        |
| 2   | Cigarro-puro                                                                                                   |                                                                                                                                                                                                                                                            |                                                                                                                                                                                                                                                                                                                                                                                                                                                                                                                                                                                                                                                                                                                                                                                                                                                                                                                                                                        |   |                   |                                                                     |                    |                   |                                                                        |   |                        |                                                                          |                        |                   |                                                                                                                             |   |                   |                                       |   |                   |                                                                 |   |                   |                        |
| 3   | Pipa                                                                                                           |                                                                                                                                                                                                                                                            |                                                                                                                                                                                                                                                                                                                                                                                                                                                                                                                                                                                                                                                                                                                                                                                                                                                                                                                                                                        |   |                   |                                                                     |                    |                   |                                                                        |   |                        |                                                                          |                        |                   |                                                                                                                             |   |                   |                                       |   |                   |                                                                 |   |                   |                        |
| 4   | Pipa de agua                                                                                                   |                                                                                                                                                                                                                                                            |                                                                                                                                                                                                                                                                                                                                                                                                                                                                                                                                                                                                                                                                                                                                                                                                                                                                                                                                                                        |   |                   |                                                                     |                    |                   |                                                                        |   |                        |                                                                          |                        |                   |                                                                                                                             |   |                   |                                       |   |                   |                                                                 |   |                   |                        |
| 5   | Vaporizador                                                                                                    |                                                                                                                                                                                                                                                            |                                                                                                                                                                                                                                                                                                                                                                                                                                                                                                                                                                                                                                                                                                                                                                                                                                                                                                                                                                        |   |                   |                                                                     |                    |                   |                                                                        |   |                        |                                                                          |                        |                   |                                                                                                                             |   |                   |                                       |   |                   |                                                                 |   |                   |                        |
| 99  | Otro producto de tabaco                                                                                        |                                                                                                                                                                                                                                                            |                                                                                                                                                                                                                                                                                                                                                                                                                                                                                                                                                                                                                                                                                                                                                                                                                                                                                                                                                                        |   |                   |                                                                     |                    |                   |                                                                        |   |                        |                                                                          |                        |                   |                                                                                                                             |   |                   |                                       |   |                   |                                                                 |   |                   |                        |
| 109 | spapel_p2<br>Mostrar el archivo SÓLO si:<br>[stabaco_personas_cant]='2'                                        | 35.- ¿Qué papel tiene el personaje en la trama?                                                                                                                                                                                                            | radio<br><table border="1"> <tr> <td>1</td> <td>Principal</td> </tr> <tr> <td>2</td> <td>Secundario</td> </tr> <tr> <td>3</td> <td>Terciario o extra</td> </tr> <tr> <td>4</td> <td>No se puede determinar</td> </tr> </table>                                                                                                                                                                                                                                                                                                                                                                                                                                                                                                                                                                                                                                                                                                                                         | 1 | Principal         | 2                                                                   | Secundario         | 3                 | Terciario o extra                                                      | 4 | No se puede determinar |                                                                          |                        |                   |                                                                                                                             |   |                   |                                       |   |                   |                                                                 |   |                   |                        |
| 1   | Principal                                                                                                      |                                                                                                                                                                                                                                                            |                                                                                                                                                                                                                                                                                                                                                                                                                                                                                                                                                                                                                                                                                                                                                                                                                                                                                                                                                                        |   |                   |                                                                     |                    |                   |                                                                        |   |                        |                                                                          |                        |                   |                                                                                                                             |   |                   |                                       |   |                   |                                                                 |   |                   |                        |
| 2   | Secundario                                                                                                     |                                                                                                                                                                                                                                                            |                                                                                                                                                                                                                                                                                                                                                                                                                                                                                                                                                                                                                                                                                                                                                                                                                                                                                                                                                                        |   |                   |                                                                     |                    |                   |                                                                        |   |                        |                                                                          |                        |                   |                                                                                                                             |   |                   |                                       |   |                   |                                                                 |   |                   |                        |
| 3   | Terciario o extra                                                                                              |                                                                                                                                                                                                                                                            |                                                                                                                                                                                                                                                                                                                                                                                                                                                                                                                                                                                                                                                                                                                                                                                                                                                                                                                                                                        |   |                   |                                                                     |                    |                   |                                                                        |   |                        |                                                                          |                        |                   |                                                                                                                             |   |                   |                                       |   |                   |                                                                 |   |                   |                        |
| 4   | No se puede determinar                                                                                         |                                                                                                                                                                                                                                                            |                                                                                                                                                                                                                                                                                                                                                                                                                                                                                                                                                                                                                                                                                                                                                                                                                                                                                                                                                                        |   |                   |                                                                     |                    |                   |                                                                        |   |                        |                                                                          |                        |                   |                                                                                                                             |   |                   |                                       |   |                   |                                                                 |   |                   |                        |
| 110 | sedad_p2<br>Mostrar el archivo SÓLO si:<br>[stabaco_personas_cant]='2'                                         | 36.- ¿Qué edad parece tener el personaje?                                                                                                                                                                                                                  | radio<br><table border="1"> <tr> <td>1</td> <td>Menor de edad &gt;18</td> </tr> <tr> <td>2</td> <td>Adulto joven 18-39</td> </tr> <tr> <td>3</td> <td>Adulto maduro 40-64</td> </tr> <tr> <td>4</td> <td>Adulto mayor 65+</td> </tr> <tr> <td>5</td> <td>No se puede determinar</td> </tr> </table>                                                                                                                                                                                                                                                                                                                                                                                                                                                                                                                                                                                                                                                                    | 1 | Menor de edad >18 | 2                                                                   | Adulto joven 18-39 | 3                 | Adulto maduro 40-64                                                    | 4 | Adulto mayor 65+       | 5                                                                        | No se puede determinar |                   |                                                                                                                             |   |                   |                                       |   |                   |                                                                 |   |                   |                        |
| 1   | Menor de edad >18                                                                                              |                                                                                                                                                                                                                                                            |                                                                                                                                                                                                                                                                                                                                                                                                                                                                                                                                                                                                                                                                                                                                                                                                                                                                                                                                                                        |   |                   |                                                                     |                    |                   |                                                                        |   |                        |                                                                          |                        |                   |                                                                                                                             |   |                   |                                       |   |                   |                                                                 |   |                   |                        |
| 2   | Adulto joven 18-39                                                                                             |                                                                                                                                                                                                                                                            |                                                                                                                                                                                                                                                                                                                                                                                                                                                                                                                                                                                                                                                                                                                                                                                                                                                                                                                                                                        |   |                   |                                                                     |                    |                   |                                                                        |   |                        |                                                                          |                        |                   |                                                                                                                             |   |                   |                                       |   |                   |                                                                 |   |                   |                        |
| 3   | Adulto maduro 40-64                                                                                            |                                                                                                                                                                                                                                                            |                                                                                                                                                                                                                                                                                                                                                                                                                                                                                                                                                                                                                                                                                                                                                                                                                                                                                                                                                                        |   |                   |                                                                     |                    |                   |                                                                        |   |                        |                                                                          |                        |                   |                                                                                                                             |   |                   |                                       |   |                   |                                                                 |   |                   |                        |
| 4   | Adulto mayor 65+                                                                                               |                                                                                                                                                                                                                                                            |                                                                                                                                                                                                                                                                                                                                                                                                                                                                                                                                                                                                                                                                                                                                                                                                                                                                                                                                                                        |   |                   |                                                                     |                    |                   |                                                                        |   |                        |                                                                          |                        |                   |                                                                                                                             |   |                   |                                       |   |                   |                                                                 |   |                   |                        |
| 5   | No se puede determinar                                                                                         |                                                                                                                                                                                                                                                            |                                                                                                                                                                                                                                                                                                                                                                                                                                                                                                                                                                                                                                                                                                                                                                                                                                                                                                                                                                        |   |                   |                                                                     |                    |                   |                                                                        |   |                        |                                                                          |                        |                   |                                                                                                                             |   |                   |                                       |   |                   |                                                                 |   |                   |                        |

23/10/2020

FONIS TABACO V2.0 | REDCap

|     |                                                                                                                 |                                                                      |                                                                                                                                                                                                                                                                                                                                                                                                                                                                                                                                                                                                                                                                                                          |   |                                       |   |                                  |   |                                  |   |                                          |   |                                                        |   |                                |   |                           |   |                                                  |   |                                         |    |                        |
|-----|-----------------------------------------------------------------------------------------------------------------|----------------------------------------------------------------------|----------------------------------------------------------------------------------------------------------------------------------------------------------------------------------------------------------------------------------------------------------------------------------------------------------------------------------------------------------------------------------------------------------------------------------------------------------------------------------------------------------------------------------------------------------------------------------------------------------------------------------------------------------------------------------------------------------|---|---------------------------------------|---|----------------------------------|---|----------------------------------|---|------------------------------------------|---|--------------------------------------------------------|---|--------------------------------|---|---------------------------|---|--------------------------------------------------|---|-----------------------------------------|----|------------------------|
| 111 | ssexo_biologico_p2<br>Mostrar el archivo SÓLO si:<br>[stabaco_personas_cant]='2'                                | 37.- ¿Qué sexo biológico parecer tener el personaje?                 | radio<br><table border="1"> <tr><td>1</td><td>Hombre</td></tr> <tr><td>2</td><td>Mujer</td></tr> <tr><td>3</td><td>No se puede determinar</td></tr> </table>                                                                                                                                                                                                                                                                                                                                                                                                                                                                                                                                             | 1 | Hombre                                | 2 | Mujer                            | 3 | No se puede determinar           |   |                                          |   |                                                        |   |                                |   |                           |   |                                                  |   |                                         |    |                        |
| 1   | Hombre                                                                                                          |                                                                      |                                                                                                                                                                                                                                                                                                                                                                                                                                                                                                                                                                                                                                                                                                          |   |                                       |   |                                  |   |                                  |   |                                          |   |                                                        |   |                                |   |                           |   |                                                  |   |                                         |    |                        |
| 2   | Mujer                                                                                                           |                                                                      |                                                                                                                                                                                                                                                                                                                                                                                                                                                                                                                                                                                                                                                                                                          |   |                                       |   |                                  |   |                                  |   |                                          |   |                                                        |   |                                |   |                           |   |                                                  |   |                                         |    |                        |
| 3   | No se puede determinar                                                                                          |                                                                      |                                                                                                                                                                                                                                                                                                                                                                                                                                                                                                                                                                                                                                                                                                          |   |                                       |   |                                  |   |                                  |   |                                          |   |                                                        |   |                                |   |                           |   |                                                  |   |                                         |    |                        |
| 112 | suso_contexto_fisico_p2<br>Mostrar el archivo SÓLO si:<br>[stabaco_personas_cant]='2'                           | 38.- ¿En qué ambiente físico usa tabaco el personaje en este minuto? | radio<br><table border="1"> <tr><td>1</td><td>En ambiente cerrado</td></tr> <tr><td>2</td><td>En ambiente semiabierto</td></tr> <tr><td>3</td><td>En ambiente abierto</td></tr> <tr><td>4</td><td>No se puede determinar</td></tr> </table>                                                                                                                                                                                                                                                                                                                                                                                                                                                              | 1 | En ambiente cerrado                   | 2 | En ambiente semiabierto          | 3 | En ambiente abierto              | 4 | No se puede determinar                   |   |                                                        |   |                                |   |                           |   |                                                  |   |                                         |    |                        |
| 1   | En ambiente cerrado                                                                                             |                                                                      |                                                                                                                                                                                                                                                                                                                                                                                                                                                                                                                                                                                                                                                                                                          |   |                                       |   |                                  |   |                                  |   |                                          |   |                                                        |   |                                |   |                           |   |                                                  |   |                                         |    |                        |
| 2   | En ambiente semiabierto                                                                                         |                                                                      |                                                                                                                                                                                                                                                                                                                                                                                                                                                                                                                                                                                                                                                                                                          |   |                                       |   |                                  |   |                                  |   |                                          |   |                                                        |   |                                |   |                           |   |                                                  |   |                                         |    |                        |
| 3   | En ambiente abierto                                                                                             |                                                                      |                                                                                                                                                                                                                                                                                                                                                                                                                                                                                                                                                                                                                                                                                                          |   |                                       |   |                                  |   |                                  |   |                                          |   |                                                        |   |                                |   |                           |   |                                                  |   |                                         |    |                        |
| 4   | No se puede determinar                                                                                          |                                                                      |                                                                                                                                                                                                                                                                                                                                                                                                                                                                                                                                                                                                                                                                                                          |   |                                       |   |                                  |   |                                  |   |                                          |   |                                                        |   |                                |   |                           |   |                                                  |   |                                         |    |                        |
| 113 | stipo_local_p2<br>Mostrar el archivo SÓLO si:<br>[suso_contexto_fisico_p2]<>'3' and [stabaco_personas_cant]='2' | 39.- ¿En qué tipo de local usa tabaco el personaje en este minuto?   | radio<br><table border="1"> <tr><td>1</td><td>En un hogar</td></tr> <tr><td>2</td><td>En un hotel o residencia</td></tr> <tr><td>3</td><td>En un bar, restaurante o similar</td></tr> <tr><td>4</td><td>En un establecimiento educativo superior</td></tr> <tr><td>5</td><td>En un establecimiento educativo de básica o secundaria</td></tr> <tr><td>6</td><td>En un establecimiento de salud</td></tr> <tr><td>7</td><td>En un medio de transporte</td></tr> <tr><td>8</td><td>En un lugar de trabajo no incluido anteriormente</td></tr> <tr><td>9</td><td>En otro lugar no incluido anteriormente</td></tr> <tr><td>10</td><td>No se puede determinar</td></tr> </table><br>alineación de encargo LV | 1 | En un hogar                           | 2 | En un hotel o residencia         | 3 | En un bar, restaurante o similar | 4 | En un establecimiento educativo superior | 5 | En un establecimiento educativo de básica o secundaria | 6 | En un establecimiento de salud | 7 | En un medio de transporte | 8 | En un lugar de trabajo no incluido anteriormente | 9 | En otro lugar no incluido anteriormente | 10 | No se puede determinar |
| 1   | En un hogar                                                                                                     |                                                                      |                                                                                                                                                                                                                                                                                                                                                                                                                                                                                                                                                                                                                                                                                                          |   |                                       |   |                                  |   |                                  |   |                                          |   |                                                        |   |                                |   |                           |   |                                                  |   |                                         |    |                        |
| 2   | En un hotel o residencia                                                                                        |                                                                      |                                                                                                                                                                                                                                                                                                                                                                                                                                                                                                                                                                                                                                                                                                          |   |                                       |   |                                  |   |                                  |   |                                          |   |                                                        |   |                                |   |                           |   |                                                  |   |                                         |    |                        |
| 3   | En un bar, restaurante o similar                                                                                |                                                                      |                                                                                                                                                                                                                                                                                                                                                                                                                                                                                                                                                                                                                                                                                                          |   |                                       |   |                                  |   |                                  |   |                                          |   |                                                        |   |                                |   |                           |   |                                                  |   |                                         |    |                        |
| 4   | En un establecimiento educativo superior                                                                        |                                                                      |                                                                                                                                                                                                                                                                                                                                                                                                                                                                                                                                                                                                                                                                                                          |   |                                       |   |                                  |   |                                  |   |                                          |   |                                                        |   |                                |   |                           |   |                                                  |   |                                         |    |                        |
| 5   | En un establecimiento educativo de básica o secundaria                                                          |                                                                      |                                                                                                                                                                                                                                                                                                                                                                                                                                                                                                                                                                                                                                                                                                          |   |                                       |   |                                  |   |                                  |   |                                          |   |                                                        |   |                                |   |                           |   |                                                  |   |                                         |    |                        |
| 6   | En un establecimiento de salud                                                                                  |                                                                      |                                                                                                                                                                                                                                                                                                                                                                                                                                                                                                                                                                                                                                                                                                          |   |                                       |   |                                  |   |                                  |   |                                          |   |                                                        |   |                                |   |                           |   |                                                  |   |                                         |    |                        |
| 7   | En un medio de transporte                                                                                       |                                                                      |                                                                                                                                                                                                                                                                                                                                                                                                                                                                                                                                                                                                                                                                                                          |   |                                       |   |                                  |   |                                  |   |                                          |   |                                                        |   |                                |   |                           |   |                                                  |   |                                         |    |                        |
| 8   | En un lugar de trabajo no incluido anteriormente                                                                |                                                                      |                                                                                                                                                                                                                                                                                                                                                                                                                                                                                                                                                                                                                                                                                                          |   |                                       |   |                                  |   |                                  |   |                                          |   |                                                        |   |                                |   |                           |   |                                                  |   |                                         |    |                        |
| 9   | En otro lugar no incluido anteriormente                                                                         |                                                                      |                                                                                                                                                                                                                                                                                                                                                                                                                                                                                                                                                                                                                                                                                                          |   |                                       |   |                                  |   |                                  |   |                                          |   |                                                        |   |                                |   |                           |   |                                                  |   |                                         |    |                        |
| 10  | No se puede determinar                                                                                          |                                                                      |                                                                                                                                                                                                                                                                                                                                                                                                                                                                                                                                                                                                                                                                                                          |   |                                       |   |                                  |   |                                  |   |                                          |   |                                                        |   |                                |   |                           |   |                                                  |   |                                         |    |                        |
| 114 | stabaco_solo_o_p2<br>Mostrar el archivo SÓLO si:<br>[stabaco_personas_cant]='2'                                 | 40.- En este minuto ¿El personaje usa tabaco en presencia de otros?  | radio<br><table border="1"> <tr><td>1</td><td>Sí, en presencia de uno o más menores</td></tr> <tr><td>2</td><td>Sí, en presencia sólo de adultos</td></tr> <tr><td>0</td><td>No</td></tr> <tr><td>4</td><td>No se puede determinar</td></tr> </table><br>alineación de encargo LV                                                                                                                                                                                                                                                                                                                                                                                                                        | 1 | Sí, en presencia de uno o más menores | 2 | Sí, en presencia sólo de adultos | 0 | No                               | 4 | No se puede determinar                   |   |                                                        |   |                                |   |                           |   |                                                  |   |                                         |    |                        |
| 1   | Sí, en presencia de uno o más menores                                                                           |                                                                      |                                                                                                                                                                                                                                                                                                                                                                                                                                                                                                                                                                                                                                                                                                          |   |                                       |   |                                  |   |                                  |   |                                          |   |                                                        |   |                                |   |                           |   |                                                  |   |                                         |    |                        |
| 2   | Sí, en presencia sólo de adultos                                                                                |                                                                      |                                                                                                                                                                                                                                                                                                                                                                                                                                                                                                                                                                                                                                                                                                          |   |                                       |   |                                  |   |                                  |   |                                          |   |                                                        |   |                                |   |                           |   |                                                  |   |                                         |    |                        |
| 0   | No                                                                                                              |                                                                      |                                                                                                                                                                                                                                                                                                                                                                                                                                                                                                                                                                                                                                                                                                          |   |                                       |   |                                  |   |                                  |   |                                          |   |                                                        |   |                                |   |                           |   |                                                  |   |                                         |    |                        |
| 4   | No se puede determinar                                                                                          |                                                                      |                                                                                                                                                                                                                                                                                                                                                                                                                                                                                                                                                                                                                                                                                                          |   |                                       |   |                                  |   |                                  |   |                                          |   |                                                        |   |                                |   |                           |   |                                                  |   |                                         |    |                        |
| 115 | sno_fumadores_p2<br>Mostrar el archivo SÓLO si:<br>[stabaco_personas_cant]='2'                                  | 41.- ¿Hay al menos un acompañante que no fuma?                       | yesno<br><table border="1"> <tr><td>1</td><td>Sí</td></tr> <tr><td>0</td><td>No</td></tr> </table>                                                                                                                                                                                                                                                                                                                                                                                                                                                                                                                                                                                                       | 1 | Sí                                    | 0 | No                               |   |                                  |   |                                          |   |                                                        |   |                                |   |                           |   |                                                  |   |                                         |    |                        |
| 1   | Sí                                                                                                              |                                                                      |                                                                                                                                                                                                                                                                                                                                                                                                                                                                                                                                                                                                                                                                                                          |   |                                       |   |                                  |   |                                  |   |                                          |   |                                                        |   |                                |   |                           |   |                                                  |   |                                         |    |                        |
| 0   | No                                                                                                              |                                                                      |                                                                                                                                                                                                                                                                                                                                                                                                                                                                                                                                                                                                                                                                                                          |   |                                       |   |                                  |   |                                  |   |                                          |   |                                                        |   |                                |   |                           |   |                                                  |   |                                         |    |                        |

23/10/2020

FONIS TABACO V2.0 | REDCap

|     |                                                                                                                                                                                                                                                                                                                                                                                                                                                                                                                                                                                                                                                                                                                                                                                                                                                                                                                                                                                                                                                                  |                                                                                                                                                                 |                                                                                                                                                                                                                                                                                                                                                                                                                                                                                                                                                                                                                                                                                                                                                                                                                                                                                                                                                       |   |                               |                                                                     |                                   |                     |                                                                        |   |                     |                                                                          |   |                     |                                                                                                                             |   |                     |                                       |   |                     |                                                                 |   |                     |                        |
|-----|------------------------------------------------------------------------------------------------------------------------------------------------------------------------------------------------------------------------------------------------------------------------------------------------------------------------------------------------------------------------------------------------------------------------------------------------------------------------------------------------------------------------------------------------------------------------------------------------------------------------------------------------------------------------------------------------------------------------------------------------------------------------------------------------------------------------------------------------------------------------------------------------------------------------------------------------------------------------------------------------------------------------------------------------------------------|-----------------------------------------------------------------------------------------------------------------------------------------------------------------|-------------------------------------------------------------------------------------------------------------------------------------------------------------------------------------------------------------------------------------------------------------------------------------------------------------------------------------------------------------------------------------------------------------------------------------------------------------------------------------------------------------------------------------------------------------------------------------------------------------------------------------------------------------------------------------------------------------------------------------------------------------------------------------------------------------------------------------------------------------------------------------------------------------------------------------------------------|---|-------------------------------|---------------------------------------------------------------------|-----------------------------------|---------------------|------------------------------------------------------------------------|---|---------------------|--------------------------------------------------------------------------|---|---------------------|-----------------------------------------------------------------------------------------------------------------------------|---|---------------------|---------------------------------------|---|---------------------|-----------------------------------------------------------------|---|---------------------|------------------------|
| 116 | <div>stabaco_motivo_2</div> <div>Mostrar el archivo SÓLO si:<br/>[stabaco_personas_cant]='2'</div>                                                                                                                                                                                                                                                                                                                                                                                                                                                                                                                                                                                                                                                                                                                                                                                                                                                                                                                                                               | 42.- Por lo que ha visto u oído hasta este minuto en este programa ¿Cuál cree que es el motivo principal por el que personaje usa o justifica el uso de tabaco? | <div>checkbox</div> <table><tr><td>1</td><td>stabaco_motivo_2__1</td><td>como cuestionamiento o rebeldía frente a las instituciones sociales</td></tr><tr><td>2</td><td>stabaco_motivo_2__2</td><td>como mecanismo para socializar o intercambiar experiencias entre pares</td></tr><tr><td>3</td><td>stabaco_motivo_2__3</td><td>porque muchos lo hacen o lo hacían en su entorno familiar o de amistades</td></tr><tr><td>4</td><td>stabaco_motivo_2__4</td><td>para proyectar una imagen ideal, glamour, encanto, éxito, o poder o para identificarse con personas o personajes que admira</td></tr><tr><td>5</td><td>stabaco_motivo_2__5</td><td>como signo de madurez e independencia</td></tr><tr><td>6</td><td>stabaco_motivo_2__6</td><td>para obtener placer, divertirse, o para hacer frente al estrés.</td></tr><tr><td>7</td><td>stabaco_motivo_2__7</td><td>No se puede determinar</td></tr></table> <div>alineación de encargo LV</div> | 1 | stabaco_motivo_2__1           | como cuestionamiento o rebeldía frente a las instituciones sociales | 2                                 | stabaco_motivo_2__2 | como mecanismo para socializar o intercambiar experiencias entre pares | 3 | stabaco_motivo_2__3 | porque muchos lo hacen o lo hacían en su entorno familiar o de amistades | 4 | stabaco_motivo_2__4 | para proyectar una imagen ideal, glamour, encanto, éxito, o poder o para identificarse con personas o personajes que admira | 5 | stabaco_motivo_2__5 | como signo de madurez e independencia | 6 | stabaco_motivo_2__6 | para obtener placer, divertirse, o para hacer frente al estrés. | 7 | stabaco_motivo_2__7 | No se puede determinar |
| 1   | stabaco_motivo_2__1                                                                                                                                                                                                                                                                                                                                                                                                                                                                                                                                                                                                                                                                                                                                                                                                                                                                                                                                                                                                                                              | como cuestionamiento o rebeldía frente a las instituciones sociales                                                                                             |                                                                                                                                                                                                                                                                                                                                                                                                                                                                                                                                                                                                                                                                                                                                                                                                                                                                                                                                                       |   |                               |                                                                     |                                   |                     |                                                                        |   |                     |                                                                          |   |                     |                                                                                                                             |   |                     |                                       |   |                     |                                                                 |   |                     |                        |
| 2   | stabaco_motivo_2__2                                                                                                                                                                                                                                                                                                                                                                                                                                                                                                                                                                                                                                                                                                                                                                                                                                                                                                                                                                                                                                              | como mecanismo para socializar o intercambiar experiencias entre pares                                                                                          |                                                                                                                                                                                                                                                                                                                                                                                                                                                                                                                                                                                                                                                                                                                                                                                                                                                                                                                                                       |   |                               |                                                                     |                                   |                     |                                                                        |   |                     |                                                                          |   |                     |                                                                                                                             |   |                     |                                       |   |                     |                                                                 |   |                     |                        |
| 3   | stabaco_motivo_2__3                                                                                                                                                                                                                                                                                                                                                                                                                                                                                                                                                                                                                                                                                                                                                                                                                                                                                                                                                                                                                                              | porque muchos lo hacen o lo hacían en su entorno familiar o de amistades                                                                                        |                                                                                                                                                                                                                                                                                                                                                                                                                                                                                                                                                                                                                                                                                                                                                                                                                                                                                                                                                       |   |                               |                                                                     |                                   |                     |                                                                        |   |                     |                                                                          |   |                     |                                                                                                                             |   |                     |                                       |   |                     |                                                                 |   |                     |                        |
| 4   | stabaco_motivo_2__4                                                                                                                                                                                                                                                                                                                                                                                                                                                                                                                                                                                                                                                                                                                                                                                                                                                                                                                                                                                                                                              | para proyectar una imagen ideal, glamour, encanto, éxito, o poder o para identificarse con personas o personajes que admira                                     |                                                                                                                                                                                                                                                                                                                                                                                                                                                                                                                                                                                                                                                                                                                                                                                                                                                                                                                                                       |   |                               |                                                                     |                                   |                     |                                                                        |   |                     |                                                                          |   |                     |                                                                                                                             |   |                     |                                       |   |                     |                                                                 |   |                     |                        |
| 5   | stabaco_motivo_2__5                                                                                                                                                                                                                                                                                                                                                                                                                                                                                                                                                                                                                                                                                                                                                                                                                                                                                                                                                                                                                                              | como signo de madurez e independencia                                                                                                                           |                                                                                                                                                                                                                                                                                                                                                                                                                                                                                                                                                                                                                                                                                                                                                                                                                                                                                                                                                       |   |                               |                                                                     |                                   |                     |                                                                        |   |                     |                                                                          |   |                     |                                                                                                                             |   |                     |                                       |   |                     |                                                                 |   |                     |                        |
| 6   | stabaco_motivo_2__6                                                                                                                                                                                                                                                                                                                                                                                                                                                                                                                                                                                                                                                                                                                                                                                                                                                                                                                                                                                                                                              | para obtener placer, divertirse, o para hacer frente al estrés.                                                                                                 |                                                                                                                                                                                                                                                                                                                                                                                                                                                                                                                                                                                                                                                                                                                                                                                                                                                                                                                                                       |   |                               |                                                                     |                                   |                     |                                                                        |   |                     |                                                                          |   |                     |                                                                                                                             |   |                     |                                       |   |                     |                                                                 |   |                     |                        |
| 7   | stabaco_motivo_2__7                                                                                                                                                                                                                                                                                                                                                                                                                                                                                                                                                                                                                                                                                                                                                                                                                                                                                                                                                                                                                                              | No se puede determinar                                                                                                                                          |                                                                                                                                                                                                                                                                                                                                                                                                                                                                                                                                                                                                                                                                                                                                                                                                                                                                                                                                                       |   |                               |                                                                     |                                   |                     |                                                                        |   |                     |                                                                          |   |                     |                                                                                                                             |   |                     |                                       |   |                     |                                                                 |   |                     |                        |
| 117 | <div>storpedo</div>                                                                                                                                                                                                                                                                                                                                                                                                                                                                                                                                                                                                                                                                                                                                                                                                                                                                                                                                                                                                                                              | TORPEDO:<br>ORDENAR NUMERACIÓN DE LAS PREGUNTAS IGUAL AL WORD, VER LA FORMA EN QUE SE GUARDE FECHA Y HORA DE ENVÍO DEL CUESTIONARIO                             | <div>descriptive</div> <div>Field Annotation: @HIDDEN</div>                                                                                                                                                                                                                                                                                                                                                                                                                                                                                                                                                                                                                                                                                                                                                                                                                                                                                           |   |                               |                                                                     |                                   |                     |                                                                        |   |                     |                                                                          |   |                     |                                                                                                                             |   |                     |                                       |   |                     |                                                                 |   |                     |                        |
| 118 | <div>stabaco_escena_explicito</div> <div>Mostrar el archivo SÓLO si:<br/>([sminuto]&lt;&gt;'0' and [srespuestas_iguales]='0' and ([stabaco_explicito]='0' or [stabaco_motivo(1)]= '1' or [stabaco_motivo(2)]= '1' or [stabaco_motivo(3)]= '1' or [stabaco_motivo(4)]= '1' or [stabaco_motivo(5)]= '1' or [stabaco_motivo(6)]= '1' or [stabaco_motivo(7)]= '1' or [stabaco_motivo_2(1)]= '1' or [stabaco_motivo_2(2)]= '1' or [stabaco_motivo_2(3)]= '1' or [stabaco_motivo_2(4)]= '1' or [stabaco_motivo_2(5)]= '1' or [stabaco_motivo_2(6)]= '1' or [stabaco_motivo_2(7)]= '1']) or ([sminuto]='0' and ([stabaco_explicito]='0' or [stabaco_motivo(1)]= '1' or [stabaco_motivo(2)]= '1' or [stabaco_motivo(3)]= '1' or [stabaco_motivo(4)]= '1' or [stabaco_motivo(5)]= '1' or [stabaco_motivo(6)]= '1' or [stabaco_motivo(7)]= '1' or [stabaco_motivo_2(1)]= '1' or [stabaco_motivo_2(2)]= '1' or [stabaco_motivo_2(3)]= '1' or [stabaco_motivo_2(4)]= '1' or [stabaco_motivo_2(5)]= '1' or [stabaco_motivo_2(6)]= '1' or [stabaco_motivo_2(7)]= '1'])))</div> | 43.- ¿Observa en este minuto el uso implícito de tabaco?                                                                                                        | <div>radio</div> <table><tr><td>1</td><td>Sí, hay audio que implica uso</td></tr><tr><td>2</td><td>Sí, hay imágenes que implican uso</td></tr><tr><td>3</td><td>Las dos anteriores son ciertas</td></tr><tr><td>4</td><td>No</td></tr></table>                                                                                                                                                                                                                                                                                                                                                                                                                                                                                                                                                                                                                                                                                                        | 1 | Sí, hay audio que implica uso | 2                                                                   | Sí, hay imágenes que implican uso | 3                   | Las dos anteriores son ciertas                                         | 4 | No                  |                                                                          |   |                     |                                                                                                                             |   |                     |                                       |   |                     |                                                                 |   |                     |                        |
| 1   | Sí, hay audio que implica uso                                                                                                                                                                                                                                                                                                                                                                                                                                                                                                                                                                                                                                                                                                                                                                                                                                                                                                                                                                                                                                    |                                                                                                                                                                 |                                                                                                                                                                                                                                                                                                                                                                                                                                                                                                                                                                                                                                                                                                                                                                                                                                                                                                                                                       |   |                               |                                                                     |                                   |                     |                                                                        |   |                     |                                                                          |   |                     |                                                                                                                             |   |                     |                                       |   |                     |                                                                 |   |                     |                        |
| 2   | Sí, hay imágenes que implican uso                                                                                                                                                                                                                                                                                                                                                                                                                                                                                                                                                                                                                                                                                                                                                                                                                                                                                                                                                                                                                                |                                                                                                                                                                 |                                                                                                                                                                                                                                                                                                                                                                                                                                                                                                                                                                                                                                                                                                                                                                                                                                                                                                                                                       |   |                               |                                                                     |                                   |                     |                                                                        |   |                     |                                                                          |   |                     |                                                                                                                             |   |                     |                                       |   |                     |                                                                 |   |                     |                        |
| 3   | Las dos anteriores son ciertas                                                                                                                                                                                                                                                                                                                                                                                                                                                                                                                                                                                                                                                                                                                                                                                                                                                                                                                                                                                                                                   |                                                                                                                                                                 |                                                                                                                                                                                                                                                                                                                                                                                                                                                                                                                                                                                                                                                                                                                                                                                                                                                                                                                                                       |   |                               |                                                                     |                                   |                     |                                                                        |   |                     |                                                                          |   |                     |                                                                                                                             |   |                     |                                       |   |                     |                                                                 |   |                     |                        |
| 4   | No                                                                                                                                                                                                                                                                                                                                                                                                                                                                                                                                                                                                                                                                                                                                                                                                                                                                                                                                                                                                                                                               |                                                                                                                                                                 |                                                                                                                                                                                                                                                                                                                                                                                                                                                                                                                                                                                                                                                                                                                                                                                                                                                                                                                                                       |   |                               |                                                                     |                                   |                     |                                                                        |   |                     |                                                                          |   |                     |                                                                                                                             |   |                     |                                       |   |                     |                                                                 |   |                     |                        |
| 119 | <div>stabaco_escena_parafernalia</div> <div>Mostrar el archivo SÓLO si:<br/>[stabaco_escena_explicito]&lt;&gt;"</div>                                                                                                                                                                                                                                                                                                                                                                                                                                                                                                                                                                                                                                                                                                                                                                                                                                                                                                                                            | 44. ¿Aparece en este minuto parafernalia del tabaco?                                                                                                            | <div>yesno</div> <table><tr><td>1</td><td>Si</td></tr><tr><td>0</td><td>No</td></tr></table>                                                                                                                                                                                                                                                                                                                                                                                                                                                                                                                                                                                                                                                                                                                                                                                                                                                          | 1 | Si                            | 0                                                                   | No                                |                     |                                                                        |   |                     |                                                                          |   |                     |                                                                                                                             |   |                     |                                       |   |                     |                                                                 |   |                     |                        |
| 1   | Si                                                                                                                                                                                                                                                                                                                                                                                                                                                                                                                                                                                                                                                                                                                                                                                                                                                                                                                                                                                                                                                               |                                                                                                                                                                 |                                                                                                                                                                                                                                                                                                                                                                                                                                                                                                                                                                                                                                                                                                                                                                                                                                                                                                                                                       |   |                               |                                                                     |                                   |                     |                                                                        |   |                     |                                                                          |   |                     |                                                                                                                             |   |                     |                                       |   |                     |                                                                 |   |                     |                        |
| 0   | No                                                                                                                                                                                                                                                                                                                                                                                                                                                                                                                                                                                                                                                                                                                                                                                                                                                                                                                                                                                                                                                               |                                                                                                                                                                 |                                                                                                                                                                                                                                                                                                                                                                                                                                                                                                                                                                                                                                                                                                                                                                                                                                                                                                                                                       |   |                               |                                                                     |                                   |                     |                                                                        |   |                     |                                                                          |   |                     |                                                                                                                             |   |                     |                                       |   |                     |                                                                 |   |                     |                        |

23/10/2020

FONIS TABACO V2.0 | REDCap

|     |                                                                                                                                                                                                                                                                 |                                                                                                                                      |                                                                          |
|-----|-----------------------------------------------------------------------------------------------------------------------------------------------------------------------------------------------------------------------------------------------------------------|--------------------------------------------------------------------------------------------------------------------------------------|--------------------------------------------------------------------------|
| 120 | sprendidos<br>Mostrar el archivo SÓLO si:<br>[stabaco_escena_parafernalia]='1'                                                                                                                                                                                  | 45.- ¿se ve uno o varios productos de tabaco no prendidos (incluidas hoja de tabaco y colillas)?                                     | yesno<br>1 Si<br>0 No                                                    |
| 121 | senvoltorios<br>Mostrar el archivo SÓLO si:<br>[sprendidos]<>"                                                                                                                                                                                                  | 46.- ¿Se ve uno o más envoltorios/recipientes de productos de tabaco?                                                                | yesno<br>1 Si<br>0 No                                                    |
| 122 | sfsforos<br>Mostrar el archivo SÓLO si:<br>[senvoltorios]<>"                                                                                                                                                                                                    | 47.- ¿Se ven encendedores, fósforos, ceniceros, papel para enrollar tabaco, filtros para cigarrillos, aunque no estén siendo usados? | yesno<br>1 Si<br>0 No                                                    |
| 123 | sobjetos<br>Mostrar el archivo SÓLO si:<br>[sfsforos]<>"                                                                                                                                                                                                        | 48.- ¿Se ven otros objetos relacionados con el tabaco no mencionados anteriormente?                                                  | yesno<br>1 Si<br>0 No                                                    |
| 124 | salerta_45_a_48<br>Mostrar el archivo SÓLO si:<br>[sprendidos]='0' and [senvoltorios]='0' and [sfsforos]='0' and [sobjetos]='0'                                                                                                                                 | Debe responder afirmativamente una de las últimas cuatro preguntas (45, 46, 47 ó 48).                                                | descriptive                                                              |
| 125 | stabaco_escena_marca<br>Mostrar el archivo SÓLO si:<br>[stabaco_escena_parafernalia]='0' and [srespuestas_iguales]='0' or [stabaco_escena_parafernalia]='0' and [sminuto]='0' or [sobjetos]<>" and [srespuestas_iguales]='0' or [sobjetos]<>" and [sminuto]='0' | 49.- ¿Aparece en este minuto alguna marca de tabaco?                                                                                 | yesno<br>1 Si<br>0 No                                                    |
| 126 | stabaco_escena_otras_ref<br>Mostrar el archivo SÓLO si:<br>[stabaco_escena_marca]<>"                                                                                                                                                                            | 50.- ¿Aparecen en este minuto otras referencias al tabaco no consideradas en las preguntas anteriores?                               | yesno<br>1 Si<br>0 No                                                    |
| 127 | spercepcion<br>Mostrar el archivo SÓLO si:<br>[stabaco_escena_otras_ref]='1' or [stabaco_explicito]='1' or [stabaco_escena_explicito]='1' or [stabaco_escena_parafernalia]='1' or [stabaco_escena_marca]='1'                                                    | 51.- ¿Cómo percibe usted el impacto para la salud pública de las impresiones tabáquicas que ha visto en este minuto?                 | radio<br>1 Negativo<br>2 Positivo<br>3 Mixto<br>4 No se puede determinar |
| 128 | storpado_3                                                                                                                                                                                                                                                      | TORPEDO 3: LÓGICAS DE BIFURCACIÓN                                                                                                    | descriptive<br>Field Annotation: @HIDDEN                                 |
| 129 | spauta                                                                                                                                                                                                                                                          | PAUTA                                                                                                                                | descriptive<br>Field Annotation: @HIDDEN                                 |
| 130 | senviar<br>Mostrar el archivo SÓLO si:<br>[sprograma_sn]='0' or [srespuestas_iguales]='1'                                                                                                                                                                       | Section Header:<br><br>FIN envíe las respuestas y continúe con el siguiente minuto.                                                  | descriptive                                                              |
| 131 | sfecha_hora_registro_2                                                                                                                                                                                                                                          | Fecha y hora de registro                                                                                                             | text (datetime_dmy)<br>Field Annotation: @NOW @READONLY @HIDDEN-SURVEY   |
| 132 | stxt_instruccion                                                                                                                                                                                                                                                | No presione el botón "ENVIAR" sino hasta haber completado la encuesta                                                                | descriptive                                                              |
| 133 | fonis_tabaco_supervisor_completo                                                                                                                                                                                                                                | Section Header: <i>Form Status</i><br>Complete?                                                                                      | dropdown<br>0 Incomplete<br>1 Unverified<br>2 Complete                   |

Instrumento: **Fonis Tabaco Supervisor Final** (fonis\_tabaco\_supervisor\_final) [^ Collapse](#)

https://redcap.ci3.cl/redcap\_v9.7.5/Design/data\_dictionary\_codebook.php?pid=182

20/31

23/10/2020

FONIS TABACO V2.0 | REDCap

|     |                      |                            |                                                                                                                                                                                                                                                                                                                                                                                                                                                                                                                                                                                  |   |                |   |                 |   |               |   |                  |   |               |   |             |   |                   |   |                 |   |                 |    |                 |    |                 |    |                 |
|-----|----------------------|----------------------------|----------------------------------------------------------------------------------------------------------------------------------------------------------------------------------------------------------------------------------------------------------------------------------------------------------------------------------------------------------------------------------------------------------------------------------------------------------------------------------------------------------------------------------------------------------------------------------|---|----------------|---|-----------------|---|---------------|---|------------------|---|---------------|---|-------------|---|-------------------|---|-----------------|---|-----------------|----|-----------------|----|-----------------|----|-----------------|
| 134 | frecord_id           | Record ID                  | text                                                                                                                                                                                                                                                                                                                                                                                                                                                                                                                                                                             |   |                |   |                 |   |               |   |                  |   |               |   |             |   |                   |   |                 |   |                 |    |                 |    |                 |    |                 |
| 135 | ffecha_hora_registro | Fecha y hora de registro   | text (datetime_dmy)<br>Field Annotation: @NOW @READONLY @HIDDEN-SURVEY                                                                                                                                                                                                                                                                                                                                                                                                                                                                                                           |   |                |   |                 |   |               |   |                  |   |               |   |             |   |                   |   |                 |   |                 |    |                 |    |                 |    |                 |
| 136 | fsupervisor          | Supervisor:                | radio <table><tr><td>1</td><td>Oscar Urrejola</td></tr><tr><td>2</td><td>Armando Peruga</td></tr><tr><td>3</td><td>Isabel Matute</td></tr><tr><td>4</td><td>Xavieria Molina</td></tr></table>                                                                                                                                                                                                                                                                                                                                                                                    | 1 | Oscar Urrejola | 2 | Armando Peruga  | 3 | Isabel Matute | 4 | Xavieria Molina  |   |               |   |             |   |                   |   |                 |   |                 |    |                 |    |                 |    |                 |
| 1   | Oscar Urrejola       |                            |                                                                                                                                                                                                                                                                                                                                                                                                                                                                                                                                                                                  |   |                |   |                 |   |               |   |                  |   |               |   |             |   |                   |   |                 |   |                 |    |                 |    |                 |    |                 |
| 2   | Armando Peruga       |                            |                                                                                                                                                                                                                                                                                                                                                                                                                                                                                                                                                                                  |   |                |   |                 |   |               |   |                  |   |               |   |             |   |                   |   |                 |   |                 |    |                 |    |                 |    |                 |
| 3   | Isabel Matute        |                            |                                                                                                                                                                                                                                                                                                                                                                                                                                                                                                                                                                                  |   |                |   |                 |   |               |   |                  |   |               |   |             |   |                   |   |                 |   |                 |    |                 |    |                 |    |                 |
| 4   | Xavieria Molina      |                            |                                                                                                                                                                                                                                                                                                                                                                                                                                                                                                                                                                                  |   |                |   |                 |   |               |   |                  |   |               |   |             |   |                   |   |                 |   |                 |    |                 |    |                 |    |                 |
| 137 | fcod                 | 1.- Nombre del observador: | dropdown (autocomplete), Required <table><tr><td>1</td><td>Oscar Urrejola</td></tr><tr><td>2</td><td>Xavieria Molina</td></tr><tr><td>3</td><td>Andrea Olea</td></tr><tr><td>4</td><td>Claudia Gonzalez</td></tr><tr><td>5</td><td>Fernando Soto</td></tr><tr><td>6</td><td>Olaya Moena</td></tr><tr><td>7</td><td>Benjamín Giordano</td></tr><tr><td>8</td><td>Javiera Martini</td></tr><tr><td>9</td><td>Verónica Toledo</td></tr><tr><td>10</td><td>Bastian Infante</td></tr><tr><td>11</td><td>Pamela Urrejola</td></tr><tr><td>12</td><td>Antonia Bandera</td></tr></table> | 1 | Oscar Urrejola | 2 | Xavieria Molina | 3 | Andrea Olea   | 4 | Claudia Gonzalez | 5 | Fernando Soto | 6 | Olaya Moena | 7 | Benjamín Giordano | 8 | Javiera Martini | 9 | Verónica Toledo | 10 | Bastian Infante | 11 | Pamela Urrejola | 12 | Antonia Bandera |
| 1   | Oscar Urrejola       |                            |                                                                                                                                                                                                                                                                                                                                                                                                                                                                                                                                                                                  |   |                |   |                 |   |               |   |                  |   |               |   |             |   |                   |   |                 |   |                 |    |                 |    |                 |    |                 |
| 2   | Xavieria Molina      |                            |                                                                                                                                                                                                                                                                                                                                                                                                                                                                                                                                                                                  |   |                |   |                 |   |               |   |                  |   |               |   |             |   |                   |   |                 |   |                 |    |                 |    |                 |    |                 |
| 3   | Andrea Olea          |                            |                                                                                                                                                                                                                                                                                                                                                                                                                                                                                                                                                                                  |   |                |   |                 |   |               |   |                  |   |               |   |             |   |                   |   |                 |   |                 |    |                 |    |                 |    |                 |
| 4   | Claudia Gonzalez     |                            |                                                                                                                                                                                                                                                                                                                                                                                                                                                                                                                                                                                  |   |                |   |                 |   |               |   |                  |   |               |   |             |   |                   |   |                 |   |                 |    |                 |    |                 |    |                 |
| 5   | Fernando Soto        |                            |                                                                                                                                                                                                                                                                                                                                                                                                                                                                                                                                                                                  |   |                |   |                 |   |               |   |                  |   |               |   |             |   |                   |   |                 |   |                 |    |                 |    |                 |    |                 |
| 6   | Olaya Moena          |                            |                                                                                                                                                                                                                                                                                                                                                                                                                                                                                                                                                                                  |   |                |   |                 |   |               |   |                  |   |               |   |             |   |                   |   |                 |   |                 |    |                 |    |                 |    |                 |
| 7   | Benjamín Giordano    |                            |                                                                                                                                                                                                                                                                                                                                                                                                                                                                                                                                                                                  |   |                |   |                 |   |               |   |                  |   |               |   |             |   |                   |   |                 |   |                 |    |                 |    |                 |    |                 |
| 8   | Javiera Martini      |                            |                                                                                                                                                                                                                                                                                                                                                                                                                                                                                                                                                                                  |   |                |   |                 |   |               |   |                  |   |               |   |             |   |                   |   |                 |   |                 |    |                 |    |                 |    |                 |
| 9   | Verónica Toledo      |                            |                                                                                                                                                                                                                                                                                                                                                                                                                                                                                                                                                                                  |   |                |   |                 |   |               |   |                  |   |               |   |             |   |                   |   |                 |   |                 |    |                 |    |                 |    |                 |
| 10  | Bastian Infante      |                            |                                                                                                                                                                                                                                                                                                                                                                                                                                                                                                                                                                                  |   |                |   |                 |   |               |   |                  |   |               |   |             |   |                   |   |                 |   |                 |    |                 |    |                 |    |                 |
| 11  | Pamela Urrejola      |                            |                                                                                                                                                                                                                                                                                                                                                                                                                                                                                                                                                                                  |   |                |   |                 |   |               |   |                  |   |               |   |             |   |                   |   |                 |   |                 |    |                 |    |                 |    |                 |
| 12  | Antonia Bandera      |                            |                                                                                                                                                                                                                                                                                                                                                                                                                                                                                                                                                                                  |   |                |   |                 |   |               |   |                  |   |               |   |             |   |                   |   |                 |   |                 |    |                 |    |                 |    |                 |

23/10/2020

FONIS TABACO V2.0 | REDCap

|     |                                                                                                                        |                                                                                                                                               |                                                                                                                                                                                                                                                                                                                                                                                                                                                                                                                                                                                                                                                                                                                                                                                                                                                                                                                                                                                       |   |    |   |    |   |   |   |   |   |   |   |   |   |   |   |   |   |   |   |   |    |    |    |    |    |    |    |    |    |    |    |    |    |    |    |    |    |    |    |    |    |    |    |    |    |    |    |    |    |    |    |    |    |    |    |    |    |    |    |    |
|-----|------------------------------------------------------------------------------------------------------------------------|-----------------------------------------------------------------------------------------------------------------------------------------------|---------------------------------------------------------------------------------------------------------------------------------------------------------------------------------------------------------------------------------------------------------------------------------------------------------------------------------------------------------------------------------------------------------------------------------------------------------------------------------------------------------------------------------------------------------------------------------------------------------------------------------------------------------------------------------------------------------------------------------------------------------------------------------------------------------------------------------------------------------------------------------------------------------------------------------------------------------------------------------------|---|----|---|----|---|---|---|---|---|---|---|---|---|---|---|---|---|---|---|---|----|----|----|----|----|----|----|----|----|----|----|----|----|----|----|----|----|----|----|----|----|----|----|----|----|----|----|----|----|----|----|----|----|----|----|----|----|----|----|----|
| 138 | fminuto                                                                                                                | 2.- Indique el minuto de emisión<br><br><i>Se considera minuto 0 desde el 00:00 hasta el 00:59</i>                                            | dropdown (autocomplete) <table><tr><td>0</td><td>0</td></tr><tr><td>1</td><td>1</td></tr><tr><td>2</td><td>2</td></tr><tr><td>3</td><td>3</td></tr><tr><td>4</td><td>4</td></tr><tr><td>5</td><td>5</td></tr><tr><td>6</td><td>6</td></tr><tr><td>7</td><td>7</td></tr><tr><td>8</td><td>8</td></tr><tr><td>9</td><td>9</td></tr><tr><td>10</td><td>10</td></tr><tr><td>11</td><td>11</td></tr><tr><td>12</td><td>12</td></tr><tr><td>13</td><td>13</td></tr><tr><td>14</td><td>14</td></tr><tr><td>15</td><td>15</td></tr><tr><td>16</td><td>16</td></tr><tr><td>17</td><td>17</td></tr><tr><td>18</td><td>18</td></tr><tr><td>19</td><td>19</td></tr><tr><td>20</td><td>20</td></tr><tr><td>21</td><td>21</td></tr><tr><td>22</td><td>22</td></tr><tr><td>23</td><td>23</td></tr><tr><td>24</td><td>24</td></tr><tr><td>25</td><td>25</td></tr><tr><td>26</td><td>26</td></tr><tr><td>27</td><td>27</td></tr><tr><td>28</td><td>28</td></tr><tr><td>29</td><td>29</td></tr></table> | 0 | 0  | 1 | 1  | 2 | 2 | 3 | 3 | 4 | 4 | 5 | 5 | 6 | 6 | 7 | 7 | 8 | 8 | 9 | 9 | 10 | 10 | 11 | 11 | 12 | 12 | 13 | 13 | 14 | 14 | 15 | 15 | 16 | 16 | 17 | 17 | 18 | 18 | 19 | 19 | 20 | 20 | 21 | 21 | 22 | 22 | 23 | 23 | 24 | 24 | 25 | 25 | 26 | 26 | 27 | 27 | 28 | 28 | 29 | 29 |
| 0   | 0                                                                                                                      |                                                                                                                                               |                                                                                                                                                                                                                                                                                                                                                                                                                                                                                                                                                                                                                                                                                                                                                                                                                                                                                                                                                                                       |   |    |   |    |   |   |   |   |   |   |   |   |   |   |   |   |   |   |   |   |    |    |    |    |    |    |    |    |    |    |    |    |    |    |    |    |    |    |    |    |    |    |    |    |    |    |    |    |    |    |    |    |    |    |    |    |    |    |    |    |
| 1   | 1                                                                                                                      |                                                                                                                                               |                                                                                                                                                                                                                                                                                                                                                                                                                                                                                                                                                                                                                                                                                                                                                                                                                                                                                                                                                                                       |   |    |   |    |   |   |   |   |   |   |   |   |   |   |   |   |   |   |   |   |    |    |    |    |    |    |    |    |    |    |    |    |    |    |    |    |    |    |    |    |    |    |    |    |    |    |    |    |    |    |    |    |    |    |    |    |    |    |    |    |
| 2   | 2                                                                                                                      |                                                                                                                                               |                                                                                                                                                                                                                                                                                                                                                                                                                                                                                                                                                                                                                                                                                                                                                                                                                                                                                                                                                                                       |   |    |   |    |   |   |   |   |   |   |   |   |   |   |   |   |   |   |   |   |    |    |    |    |    |    |    |    |    |    |    |    |    |    |    |    |    |    |    |    |    |    |    |    |    |    |    |    |    |    |    |    |    |    |    |    |    |    |    |    |
| 3   | 3                                                                                                                      |                                                                                                                                               |                                                                                                                                                                                                                                                                                                                                                                                                                                                                                                                                                                                                                                                                                                                                                                                                                                                                                                                                                                                       |   |    |   |    |   |   |   |   |   |   |   |   |   |   |   |   |   |   |   |   |    |    |    |    |    |    |    |    |    |    |    |    |    |    |    |    |    |    |    |    |    |    |    |    |    |    |    |    |    |    |    |    |    |    |    |    |    |    |    |    |
| 4   | 4                                                                                                                      |                                                                                                                                               |                                                                                                                                                                                                                                                                                                                                                                                                                                                                                                                                                                                                                                                                                                                                                                                                                                                                                                                                                                                       |   |    |   |    |   |   |   |   |   |   |   |   |   |   |   |   |   |   |   |   |    |    |    |    |    |    |    |    |    |    |    |    |    |    |    |    |    |    |    |    |    |    |    |    |    |    |    |    |    |    |    |    |    |    |    |    |    |    |    |    |
| 5   | 5                                                                                                                      |                                                                                                                                               |                                                                                                                                                                                                                                                                                                                                                                                                                                                                                                                                                                                                                                                                                                                                                                                                                                                                                                                                                                                       |   |    |   |    |   |   |   |   |   |   |   |   |   |   |   |   |   |   |   |   |    |    |    |    |    |    |    |    |    |    |    |    |    |    |    |    |    |    |    |    |    |    |    |    |    |    |    |    |    |    |    |    |    |    |    |    |    |    |    |    |
| 6   | 6                                                                                                                      |                                                                                                                                               |                                                                                                                                                                                                                                                                                                                                                                                                                                                                                                                                                                                                                                                                                                                                                                                                                                                                                                                                                                                       |   |    |   |    |   |   |   |   |   |   |   |   |   |   |   |   |   |   |   |   |    |    |    |    |    |    |    |    |    |    |    |    |    |    |    |    |    |    |    |    |    |    |    |    |    |    |    |    |    |    |    |    |    |    |    |    |    |    |    |    |
| 7   | 7                                                                                                                      |                                                                                                                                               |                                                                                                                                                                                                                                                                                                                                                                                                                                                                                                                                                                                                                                                                                                                                                                                                                                                                                                                                                                                       |   |    |   |    |   |   |   |   |   |   |   |   |   |   |   |   |   |   |   |   |    |    |    |    |    |    |    |    |    |    |    |    |    |    |    |    |    |    |    |    |    |    |    |    |    |    |    |    |    |    |    |    |    |    |    |    |    |    |    |    |
| 8   | 8                                                                                                                      |                                                                                                                                               |                                                                                                                                                                                                                                                                                                                                                                                                                                                                                                                                                                                                                                                                                                                                                                                                                                                                                                                                                                                       |   |    |   |    |   |   |   |   |   |   |   |   |   |   |   |   |   |   |   |   |    |    |    |    |    |    |    |    |    |    |    |    |    |    |    |    |    |    |    |    |    |    |    |    |    |    |    |    |    |    |    |    |    |    |    |    |    |    |    |    |
| 9   | 9                                                                                                                      |                                                                                                                                               |                                                                                                                                                                                                                                                                                                                                                                                                                                                                                                                                                                                                                                                                                                                                                                                                                                                                                                                                                                                       |   |    |   |    |   |   |   |   |   |   |   |   |   |   |   |   |   |   |   |   |    |    |    |    |    |    |    |    |    |    |    |    |    |    |    |    |    |    |    |    |    |    |    |    |    |    |    |    |    |    |    |    |    |    |    |    |    |    |    |    |
| 10  | 10                                                                                                                     |                                                                                                                                               |                                                                                                                                                                                                                                                                                                                                                                                                                                                                                                                                                                                                                                                                                                                                                                                                                                                                                                                                                                                       |   |    |   |    |   |   |   |   |   |   |   |   |   |   |   |   |   |   |   |   |    |    |    |    |    |    |    |    |    |    |    |    |    |    |    |    |    |    |    |    |    |    |    |    |    |    |    |    |    |    |    |    |    |    |    |    |    |    |    |    |
| 11  | 11                                                                                                                     |                                                                                                                                               |                                                                                                                                                                                                                                                                                                                                                                                                                                                                                                                                                                                                                                                                                                                                                                                                                                                                                                                                                                                       |   |    |   |    |   |   |   |   |   |   |   |   |   |   |   |   |   |   |   |   |    |    |    |    |    |    |    |    |    |    |    |    |    |    |    |    |    |    |    |    |    |    |    |    |    |    |    |    |    |    |    |    |    |    |    |    |    |    |    |    |
| 12  | 12                                                                                                                     |                                                                                                                                               |                                                                                                                                                                                                                                                                                                                                                                                                                                                                                                                                                                                                                                                                                                                                                                                                                                                                                                                                                                                       |   |    |   |    |   |   |   |   |   |   |   |   |   |   |   |   |   |   |   |   |    |    |    |    |    |    |    |    |    |    |    |    |    |    |    |    |    |    |    |    |    |    |    |    |    |    |    |    |    |    |    |    |    |    |    |    |    |    |    |    |
| 13  | 13                                                                                                                     |                                                                                                                                               |                                                                                                                                                                                                                                                                                                                                                                                                                                                                                                                                                                                                                                                                                                                                                                                                                                                                                                                                                                                       |   |    |   |    |   |   |   |   |   |   |   |   |   |   |   |   |   |   |   |   |    |    |    |    |    |    |    |    |    |    |    |    |    |    |    |    |    |    |    |    |    |    |    |    |    |    |    |    |    |    |    |    |    |    |    |    |    |    |    |    |
| 14  | 14                                                                                                                     |                                                                                                                                               |                                                                                                                                                                                                                                                                                                                                                                                                                                                                                                                                                                                                                                                                                                                                                                                                                                                                                                                                                                                       |   |    |   |    |   |   |   |   |   |   |   |   |   |   |   |   |   |   |   |   |    |    |    |    |    |    |    |    |    |    |    |    |    |    |    |    |    |    |    |    |    |    |    |    |    |    |    |    |    |    |    |    |    |    |    |    |    |    |    |    |
| 15  | 15                                                                                                                     |                                                                                                                                               |                                                                                                                                                                                                                                                                                                                                                                                                                                                                                                                                                                                                                                                                                                                                                                                                                                                                                                                                                                                       |   |    |   |    |   |   |   |   |   |   |   |   |   |   |   |   |   |   |   |   |    |    |    |    |    |    |    |    |    |    |    |    |    |    |    |    |    |    |    |    |    |    |    |    |    |    |    |    |    |    |    |    |    |    |    |    |    |    |    |    |
| 16  | 16                                                                                                                     |                                                                                                                                               |                                                                                                                                                                                                                                                                                                                                                                                                                                                                                                                                                                                                                                                                                                                                                                                                                                                                                                                                                                                       |   |    |   |    |   |   |   |   |   |   |   |   |   |   |   |   |   |   |   |   |    |    |    |    |    |    |    |    |    |    |    |    |    |    |    |    |    |    |    |    |    |    |    |    |    |    |    |    |    |    |    |    |    |    |    |    |    |    |    |    |
| 17  | 17                                                                                                                     |                                                                                                                                               |                                                                                                                                                                                                                                                                                                                                                                                                                                                                                                                                                                                                                                                                                                                                                                                                                                                                                                                                                                                       |   |    |   |    |   |   |   |   |   |   |   |   |   |   |   |   |   |   |   |   |    |    |    |    |    |    |    |    |    |    |    |    |    |    |    |    |    |    |    |    |    |    |    |    |    |    |    |    |    |    |    |    |    |    |    |    |    |    |    |    |
| 18  | 18                                                                                                                     |                                                                                                                                               |                                                                                                                                                                                                                                                                                                                                                                                                                                                                                                                                                                                                                                                                                                                                                                                                                                                                                                                                                                                       |   |    |   |    |   |   |   |   |   |   |   |   |   |   |   |   |   |   |   |   |    |    |    |    |    |    |    |    |    |    |    |    |    |    |    |    |    |    |    |    |    |    |    |    |    |    |    |    |    |    |    |    |    |    |    |    |    |    |    |    |
| 19  | 19                                                                                                                     |                                                                                                                                               |                                                                                                                                                                                                                                                                                                                                                                                                                                                                                                                                                                                                                                                                                                                                                                                                                                                                                                                                                                                       |   |    |   |    |   |   |   |   |   |   |   |   |   |   |   |   |   |   |   |   |    |    |    |    |    |    |    |    |    |    |    |    |    |    |    |    |    |    |    |    |    |    |    |    |    |    |    |    |    |    |    |    |    |    |    |    |    |    |    |    |
| 20  | 20                                                                                                                     |                                                                                                                                               |                                                                                                                                                                                                                                                                                                                                                                                                                                                                                                                                                                                                                                                                                                                                                                                                                                                                                                                                                                                       |   |    |   |    |   |   |   |   |   |   |   |   |   |   |   |   |   |   |   |   |    |    |    |    |    |    |    |    |    |    |    |    |    |    |    |    |    |    |    |    |    |    |    |    |    |    |    |    |    |    |    |    |    |    |    |    |    |    |    |    |
| 21  | 21                                                                                                                     |                                                                                                                                               |                                                                                                                                                                                                                                                                                                                                                                                                                                                                                                                                                                                                                                                                                                                                                                                                                                                                                                                                                                                       |   |    |   |    |   |   |   |   |   |   |   |   |   |   |   |   |   |   |   |   |    |    |    |    |    |    |    |    |    |    |    |    |    |    |    |    |    |    |    |    |    |    |    |    |    |    |    |    |    |    |    |    |    |    |    |    |    |    |    |    |
| 22  | 22                                                                                                                     |                                                                                                                                               |                                                                                                                                                                                                                                                                                                                                                                                                                                                                                                                                                                                                                                                                                                                                                                                                                                                                                                                                                                                       |   |    |   |    |   |   |   |   |   |   |   |   |   |   |   |   |   |   |   |   |    |    |    |    |    |    |    |    |    |    |    |    |    |    |    |    |    |    |    |    |    |    |    |    |    |    |    |    |    |    |    |    |    |    |    |    |    |    |    |    |
| 23  | 23                                                                                                                     |                                                                                                                                               |                                                                                                                                                                                                                                                                                                                                                                                                                                                                                                                                                                                                                                                                                                                                                                                                                                                                                                                                                                                       |   |    |   |    |   |   |   |   |   |   |   |   |   |   |   |   |   |   |   |   |    |    |    |    |    |    |    |    |    |    |    |    |    |    |    |    |    |    |    |    |    |    |    |    |    |    |    |    |    |    |    |    |    |    |    |    |    |    |    |    |
| 24  | 24                                                                                                                     |                                                                                                                                               |                                                                                                                                                                                                                                                                                                                                                                                                                                                                                                                                                                                                                                                                                                                                                                                                                                                                                                                                                                                       |   |    |   |    |   |   |   |   |   |   |   |   |   |   |   |   |   |   |   |   |    |    |    |    |    |    |    |    |    |    |    |    |    |    |    |    |    |    |    |    |    |    |    |    |    |    |    |    |    |    |    |    |    |    |    |    |    |    |    |    |
| 25  | 25                                                                                                                     |                                                                                                                                               |                                                                                                                                                                                                                                                                                                                                                                                                                                                                                                                                                                                                                                                                                                                                                                                                                                                                                                                                                                                       |   |    |   |    |   |   |   |   |   |   |   |   |   |   |   |   |   |   |   |   |    |    |    |    |    |    |    |    |    |    |    |    |    |    |    |    |    |    |    |    |    |    |    |    |    |    |    |    |    |    |    |    |    |    |    |    |    |    |    |    |
| 26  | 26                                                                                                                     |                                                                                                                                               |                                                                                                                                                                                                                                                                                                                                                                                                                                                                                                                                                                                                                                                                                                                                                                                                                                                                                                                                                                                       |   |    |   |    |   |   |   |   |   |   |   |   |   |   |   |   |   |   |   |   |    |    |    |    |    |    |    |    |    |    |    |    |    |    |    |    |    |    |    |    |    |    |    |    |    |    |    |    |    |    |    |    |    |    |    |    |    |    |    |    |
| 27  | 27                                                                                                                     |                                                                                                                                               |                                                                                                                                                                                                                                                                                                                                                                                                                                                                                                                                                                                                                                                                                                                                                                                                                                                                                                                                                                                       |   |    |   |    |   |   |   |   |   |   |   |   |   |   |   |   |   |   |   |   |    |    |    |    |    |    |    |    |    |    |    |    |    |    |    |    |    |    |    |    |    |    |    |    |    |    |    |    |    |    |    |    |    |    |    |    |    |    |    |    |
| 28  | 28                                                                                                                     |                                                                                                                                               |                                                                                                                                                                                                                                                                                                                                                                                                                                                                                                                                                                                                                                                                                                                                                                                                                                                                                                                                                                                       |   |    |   |    |   |   |   |   |   |   |   |   |   |   |   |   |   |   |   |   |    |    |    |    |    |    |    |    |    |    |    |    |    |    |    |    |    |    |    |    |    |    |    |    |    |    |    |    |    |    |    |    |    |    |    |    |    |    |    |    |
| 29  | 29                                                                                                                     |                                                                                                                                               |                                                                                                                                                                                                                                                                                                                                                                                                                                                                                                                                                                                                                                                                                                                                                                                                                                                                                                                                                                                       |   |    |   |    |   |   |   |   |   |   |   |   |   |   |   |   |   |   |   |   |    |    |    |    |    |    |    |    |    |    |    |    |    |    |    |    |    |    |    |    |    |    |    |    |    |    |    |    |    |    |    |    |    |    |    |    |    |    |    |    |
| 139 | frespuestas_iguales<br><br>Mostrar el archivo SÓLO si:<br>[fminuto]<>'0' and [fminuto]<<br>>"                          | 3.- ¿Las respuestas a TODAS las preguntas del cuestionario para este minuto son EXACTAMENTE iguales a las del minuto inmediatamente anterior? | yesno <table><tr><td>1</td><td>Si</td></tr><tr><td>0</td><td>No</td></tr></table>                                                                                                                                                                                                                                                                                                                                                                                                                                                                                                                                                                                                                                                                                                                                                                                                                                                                                                     | 1 | Si | 0 | No |   |   |   |   |   |   |   |   |   |   |   |   |   |   |   |   |    |    |    |    |    |    |    |    |    |    |    |    |    |    |    |    |    |    |    |    |    |    |    |    |    |    |    |    |    |    |    |    |    |    |    |    |    |    |    |    |
| 1   | Si                                                                                                                     |                                                                                                                                               |                                                                                                                                                                                                                                                                                                                                                                                                                                                                                                                                                                                                                                                                                                                                                                                                                                                                                                                                                                                       |   |    |   |    |   |   |   |   |   |   |   |   |   |   |   |   |   |   |   |   |    |    |    |    |    |    |    |    |    |    |    |    |    |    |    |    |    |    |    |    |    |    |    |    |    |    |    |    |    |    |    |    |    |    |    |    |    |    |    |    |
| 0   | No                                                                                                                     |                                                                                                                                               |                                                                                                                                                                                                                                                                                                                                                                                                                                                                                                                                                                                                                                                                                                                                                                                                                                                                                                                                                                                       |   |    |   |    |   |   |   |   |   |   |   |   |   |   |   |   |   |   |   |   |    |    |    |    |    |    |    |    |    |    |    |    |    |    |    |    |    |    |    |    |    |    |    |    |    |    |    |    |    |    |    |    |    |    |    |    |    |    |    |    |
| 140 | ffecha_emision<br><br>Mostrar el archivo SÓLO si:<br>[fminuto]='0' or [fminuto]<<br>>'0' and [frespuestas_iguales]='0' | 4.- Fecha de emisión:                                                                                                                         | text (date_dmy)                                                                                                                                                                                                                                                                                                                                                                                                                                                                                                                                                                                                                                                                                                                                                                                                                                                                                                                                                                       |   |    |   |    |   |   |   |   |   |   |   |   |   |   |   |   |   |   |   |   |    |    |    |    |    |    |    |    |    |    |    |    |    |    |    |    |    |    |    |    |    |    |    |    |    |    |    |    |    |    |    |    |    |    |    |    |    |    |    |    |

23/10/2020

FONIS TABACO V2.0 | REDCap

|                 |                                                                                                                 |                                                                                                                      |                                                                                                                                                                                                                                                                                                                                                                                                                                                                                                                                                                                                                                                                                                                                       |     |             |     |              |     |                        |          |              |                 |                 |             |                         |                |                |                |                |               |               |             |             |        |        |      |      |     |     |     |     |        |     |
|-----------------|-----------------------------------------------------------------------------------------------------------------|----------------------------------------------------------------------------------------------------------------------|---------------------------------------------------------------------------------------------------------------------------------------------------------------------------------------------------------------------------------------------------------------------------------------------------------------------------------------------------------------------------------------------------------------------------------------------------------------------------------------------------------------------------------------------------------------------------------------------------------------------------------------------------------------------------------------------------------------------------------------|-----|-------------|-----|--------------|-----|------------------------|----------|--------------|-----------------|-----------------|-------------|-------------------------|----------------|----------------|----------------|----------------|---------------|---------------|-------------|-------------|--------|--------|------|------|-----|-----|-----|-----|--------|-----|
| 141             | fbloque_horario<br>Mostrar el archivo SÓLO si:<br>[fminuto]='0' or [fminuto]<>'0' and [frespuestas_iguales]='0' | 5.- Bloque horario de Emisión:                                                                                       | radio<br><table border="1"> <tr><td>1</td><td>20:00-20:29</td></tr> <tr><td>2</td><td>20:30-20:59</td></tr> <tr><td>3</td><td>21:00-21:29</td></tr> <tr><td>4</td><td>21:30-21:59</td></tr> <tr><td>5</td><td>22:00-22:29</td></tr> <tr><td>6</td><td>22:30-22:59</td></tr> <tr><td>7</td><td>23:00-23:29</td></tr> <tr><td>8</td><td>23:30-23:59</td></tr> <tr><td>9</td><td>00:00-00:29</td></tr> <tr><td>10</td><td>00:30-00:59</td></tr> </table>                                                                                                                                                                                                                                                                                 | 1   | 20:00-20:29 | 2   | 20:30-20:59  | 3   | 21:00-21:29            | 4        | 21:30-21:59  | 5               | 22:00-22:29     | 6           | 22:30-22:59             | 7              | 23:00-23:29    | 8              | 23:30-23:59    | 9             | 00:00-00:29   | 10          | 00:30-00:59 |        |        |      |      |     |     |     |     |        |     |
| 1               | 20:00-20:29                                                                                                     |                                                                                                                      |                                                                                                                                                                                                                                                                                                                                                                                                                                                                                                                                                                                                                                                                                                                                       |     |             |     |              |     |                        |          |              |                 |                 |             |                         |                |                |                |                |               |               |             |             |        |        |      |      |     |     |     |     |        |     |
| 2               | 20:30-20:59                                                                                                     |                                                                                                                      |                                                                                                                                                                                                                                                                                                                                                                                                                                                                                                                                                                                                                                                                                                                                       |     |             |     |              |     |                        |          |              |                 |                 |             |                         |                |                |                |                |               |               |             |             |        |        |      |      |     |     |     |     |        |     |
| 3               | 21:00-21:29                                                                                                     |                                                                                                                      |                                                                                                                                                                                                                                                                                                                                                                                                                                                                                                                                                                                                                                                                                                                                       |     |             |     |              |     |                        |          |              |                 |                 |             |                         |                |                |                |                |               |               |             |             |        |        |      |      |     |     |     |     |        |     |
| 4               | 21:30-21:59                                                                                                     |                                                                                                                      |                                                                                                                                                                                                                                                                                                                                                                                                                                                                                                                                                                                                                                                                                                                                       |     |             |     |              |     |                        |          |              |                 |                 |             |                         |                |                |                |                |               |               |             |             |        |        |      |      |     |     |     |     |        |     |
| 5               | 22:00-22:29                                                                                                     |                                                                                                                      |                                                                                                                                                                                                                                                                                                                                                                                                                                                                                                                                                                                                                                                                                                                                       |     |             |     |              |     |                        |          |              |                 |                 |             |                         |                |                |                |                |               |               |             |             |        |        |      |      |     |     |     |     |        |     |
| 6               | 22:30-22:59                                                                                                     |                                                                                                                      |                                                                                                                                                                                                                                                                                                                                                                                                                                                                                                                                                                                                                                                                                                                                       |     |             |     |              |     |                        |          |              |                 |                 |             |                         |                |                |                |                |               |               |             |             |        |        |      |      |     |     |     |     |        |     |
| 7               | 23:00-23:29                                                                                                     |                                                                                                                      |                                                                                                                                                                                                                                                                                                                                                                                                                                                                                                                                                                                                                                                                                                                                       |     |             |     |              |     |                        |          |              |                 |                 |             |                         |                |                |                |                |               |               |             |             |        |        |      |      |     |     |     |     |        |     |
| 8               | 23:30-23:59                                                                                                     |                                                                                                                      |                                                                                                                                                                                                                                                                                                                                                                                                                                                                                                                                                                                                                                                                                                                                       |     |             |     |              |     |                        |          |              |                 |                 |             |                         |                |                |                |                |               |               |             |             |        |        |      |      |     |     |     |     |        |     |
| 9               | 00:00-00:29                                                                                                     |                                                                                                                      |                                                                                                                                                                                                                                                                                                                                                                                                                                                                                                                                                                                                                                                                                                                                       |     |             |     |              |     |                        |          |              |                 |                 |             |                         |                |                |                |                |               |               |             |             |        |        |      |      |     |     |     |     |        |     |
| 10              | 00:30-00:59                                                                                                     |                                                                                                                      |                                                                                                                                                                                                                                                                                                                                                                                                                                                                                                                                                                                                                                                                                                                                       |     |             |     |              |     |                        |          |              |                 |                 |             |                         |                |                |                |                |               |               |             |             |        |        |      |      |     |     |     |     |        |     |
| 142             | fcanal<br>Mostrar el archivo SÓLO si:<br>[fminuto]='0' or [fminuto]<>'0' and [frespuestas_iguales]='0'          | 6.- Canal de TV:                                                                                                     | dropdown (autocomplete)<br><table border="1"> <tr><td>AyE</td><td>A&amp;E</td></tr> <tr><td>AMC</td><td>AMC</td></tr> <tr><td>AXN</td><td>AXN</td></tr> <tr><td>Canal_13</td><td>Canal 13</td></tr> <tr><td>Cartoon_Network</td><td>Cartoon Network</td></tr> <tr><td>Chilevision</td><td>Chilevisión</td></tr> <tr><td>Discovery_Kids</td><td>Discovery Kids</td></tr> <tr><td>Disney_Channel</td><td>Disney Channel</td></tr> <tr><td>Disney_Junior</td><td>Disney Junior</td></tr> <tr><td>Fox_Channel</td><td>Fox Channel</td></tr> <tr><td>La_Red</td><td>La Red</td></tr> <tr><td>Mega</td><td>Mega</td></tr> <tr><td>TNT</td><td>TNT</td></tr> <tr><td>TVN</td><td>TVN</td></tr> <tr><td>TV_mas</td><td>TV+</td></tr> </table> | AyE | A&E         | AMC | AMC          | AXN | AXN                    | Canal_13 | Canal 13     | Cartoon_Network | Cartoon Network | Chilevision | Chilevisión             | Discovery_Kids | Discovery Kids | Disney_Channel | Disney Channel | Disney_Junior | Disney Junior | Fox_Channel | Fox Channel | La_Red | La Red | Mega | Mega | TNT | TNT | TVN | TVN | TV_mas | TV+ |
| AyE             | A&E                                                                                                             |                                                                                                                      |                                                                                                                                                                                                                                                                                                                                                                                                                                                                                                                                                                                                                                                                                                                                       |     |             |     |              |     |                        |          |              |                 |                 |             |                         |                |                |                |                |               |               |             |             |        |        |      |      |     |     |     |     |        |     |
| AMC             | AMC                                                                                                             |                                                                                                                      |                                                                                                                                                                                                                                                                                                                                                                                                                                                                                                                                                                                                                                                                                                                                       |     |             |     |              |     |                        |          |              |                 |                 |             |                         |                |                |                |                |               |               |             |             |        |        |      |      |     |     |     |     |        |     |
| AXN             | AXN                                                                                                             |                                                                                                                      |                                                                                                                                                                                                                                                                                                                                                                                                                                                                                                                                                                                                                                                                                                                                       |     |             |     |              |     |                        |          |              |                 |                 |             |                         |                |                |                |                |               |               |             |             |        |        |      |      |     |     |     |     |        |     |
| Canal_13        | Canal 13                                                                                                        |                                                                                                                      |                                                                                                                                                                                                                                                                                                                                                                                                                                                                                                                                                                                                                                                                                                                                       |     |             |     |              |     |                        |          |              |                 |                 |             |                         |                |                |                |                |               |               |             |             |        |        |      |      |     |     |     |     |        |     |
| Cartoon_Network | Cartoon Network                                                                                                 |                                                                                                                      |                                                                                                                                                                                                                                                                                                                                                                                                                                                                                                                                                                                                                                                                                                                                       |     |             |     |              |     |                        |          |              |                 |                 |             |                         |                |                |                |                |               |               |             |             |        |        |      |      |     |     |     |     |        |     |
| Chilevision     | Chilevisión                                                                                                     |                                                                                                                      |                                                                                                                                                                                                                                                                                                                                                                                                                                                                                                                                                                                                                                                                                                                                       |     |             |     |              |     |                        |          |              |                 |                 |             |                         |                |                |                |                |               |               |             |             |        |        |      |      |     |     |     |     |        |     |
| Discovery_Kids  | Discovery Kids                                                                                                  |                                                                                                                      |                                                                                                                                                                                                                                                                                                                                                                                                                                                                                                                                                                                                                                                                                                                                       |     |             |     |              |     |                        |          |              |                 |                 |             |                         |                |                |                |                |               |               |             |             |        |        |      |      |     |     |     |     |        |     |
| Disney_Channel  | Disney Channel                                                                                                  |                                                                                                                      |                                                                                                                                                                                                                                                                                                                                                                                                                                                                                                                                                                                                                                                                                                                                       |     |             |     |              |     |                        |          |              |                 |                 |             |                         |                |                |                |                |               |               |             |             |        |        |      |      |     |     |     |     |        |     |
| Disney_Junior   | Disney Junior                                                                                                   |                                                                                                                      |                                                                                                                                                                                                                                                                                                                                                                                                                                                                                                                                                                                                                                                                                                                                       |     |             |     |              |     |                        |          |              |                 |                 |             |                         |                |                |                |                |               |               |             |             |        |        |      |      |     |     |     |     |        |     |
| Fox_Channel     | Fox Channel                                                                                                     |                                                                                                                      |                                                                                                                                                                                                                                                                                                                                                                                                                                                                                                                                                                                                                                                                                                                                       |     |             |     |              |     |                        |          |              |                 |                 |             |                         |                |                |                |                |               |               |             |             |        |        |      |      |     |     |     |     |        |     |
| La_Red          | La Red                                                                                                          |                                                                                                                      |                                                                                                                                                                                                                                                                                                                                                                                                                                                                                                                                                                                                                                                                                                                                       |     |             |     |              |     |                        |          |              |                 |                 |             |                         |                |                |                |                |               |               |             |             |        |        |      |      |     |     |     |     |        |     |
| Mega            | Mega                                                                                                            |                                                                                                                      |                                                                                                                                                                                                                                                                                                                                                                                                                                                                                                                                                                                                                                                                                                                                       |     |             |     |              |     |                        |          |              |                 |                 |             |                         |                |                |                |                |               |               |             |             |        |        |      |      |     |     |     |     |        |     |
| TNT             | TNT                                                                                                             |                                                                                                                      |                                                                                                                                                                                                                                                                                                                                                                                                                                                                                                                                                                                                                                                                                                                                       |     |             |     |              |     |                        |          |              |                 |                 |             |                         |                |                |                |                |               |               |             |             |        |        |      |      |     |     |     |     |        |     |
| TVN             | TVN                                                                                                             |                                                                                                                      |                                                                                                                                                                                                                                                                                                                                                                                                                                                                                                                                                                                                                                                                                                                                       |     |             |     |              |     |                        |          |              |                 |                 |             |                         |                |                |                |                |               |               |             |             |        |        |      |      |     |     |     |     |        |     |
| TV_mas          | TV+                                                                                                             |                                                                                                                      |                                                                                                                                                                                                                                                                                                                                                                                                                                                                                                                                                                                                                                                                                                                                       |     |             |     |              |     |                        |          |              |                 |                 |             |                         |                |                |                |                |               |               |             |             |        |        |      |      |     |     |     |     |        |     |
| 143             | femision<br>Mostrar el archivo SÓLO si:<br>[frespuestas_iguales]='0' or [fminuto]='0'                           | Section Header:<br>8.- En este minuto ¿Ves o escuchas, aunque sea parcialmente, un anuncio por al menos 10 segundos? | radio<br><table border="1"> <tr><td>1</td><td>Sí</td></tr> <tr><td>0</td><td>No</td></tr> </table>                                                                                                                                                                                                                                                                                                                                                                                                                                                                                                                                                                                                                                    | 1   | Sí          | 0   | No           |     |                        |          |              |                 |                 |             |                         |                |                |                |                |               |               |             |             |        |        |      |      |     |     |     |     |        |     |
| 1               | Sí                                                                                                              |                                                                                                                      |                                                                                                                                                                                                                                                                                                                                                                                                                                                                                                                                                                                                                                                                                                                                       |     |             |     |              |     |                        |          |              |                 |                 |             |                         |                |                |                |                |               |               |             |             |        |        |      |      |     |     |     |     |        |     |
| 0               | No                                                                                                              |                                                                                                                      |                                                                                                                                                                                                                                                                                                                                                                                                                                                                                                                                                                                                                                                                                                                                       |     |             |     |              |     |                        |          |              |                 |                 |             |                         |                |                |                |                |               |               |             |             |        |        |      |      |     |     |     |     |        |     |
| 144             | ftabaco_sn<br>Mostrar el archivo SÓLO si:<br>[femision]='1'                                                     | 9.- ¿Es un anuncio de tabaco?                                                                                        | radio<br><table border="1"> <tr><td>1</td><td>Sí</td></tr> <tr><td>0</td><td>No</td></tr> <tr><td>2</td><td>No se puede determinar</td></tr> </table>                                                                                                                                                                                                                                                                                                                                                                                                                                                                                                                                                                                 | 1   | Sí          | 0   | No           | 2   | No se puede determinar |          |              |                 |                 |             |                         |                |                |                |                |               |               |             |             |        |        |      |      |     |     |     |     |        |     |
| 1               | Sí                                                                                                              |                                                                                                                      |                                                                                                                                                                                                                                                                                                                                                                                                                                                                                                                                                                                                                                                                                                                                       |     |             |     |              |     |                        |          |              |                 |                 |             |                         |                |                |                |                |               |               |             |             |        |        |      |      |     |     |     |     |        |     |
| 0               | No                                                                                                              |                                                                                                                      |                                                                                                                                                                                                                                                                                                                                                                                                                                                                                                                                                                                                                                                                                                                                       |     |             |     |              |     |                        |          |              |                 |                 |             |                         |                |                |                |                |               |               |             |             |        |        |      |      |     |     |     |     |        |     |
| 2               | No se puede determinar                                                                                          |                                                                                                                      |                                                                                                                                                                                                                                                                                                                                                                                                                                                                                                                                                                                                                                                                                                                                       |     |             |     |              |     |                        |          |              |                 |                 |             |                         |                |                |                |                |               |               |             |             |        |        |      |      |     |     |     |     |        |     |
| 145             | ftabaco_tipo<br>Mostrar el archivo SÓLO si:<br>[ftabaco_sn]='1'                                                 | 10.- ¿Qué tipo de producto de tabaco se anuncia?                                                                     | radio<br><table border="1"> <tr><td>1</td><td>Cigarrillo</td></tr> <tr><td>2</td><td>Cigarro-puro</td></tr> <tr><td>3</td><td>Pipa</td></tr> <tr><td>4</td><td>Pipa de agua</td></tr> <tr><td>5</td><td>Vaporizador</td></tr> <tr><td>99</td><td>Otro producto de tabaco</td></tr> </table>                                                                                                                                                                                                                                                                                                                                                                                                                                           | 1   | Cigarrillo  | 2   | Cigarro-puro | 3   | Pipa                   | 4        | Pipa de agua | 5               | Vaporizador     | 99          | Otro producto de tabaco |                |                |                |                |               |               |             |             |        |        |      |      |     |     |     |     |        |     |
| 1               | Cigarrillo                                                                                                      |                                                                                                                      |                                                                                                                                                                                                                                                                                                                                                                                                                                                                                                                                                                                                                                                                                                                                       |     |             |     |              |     |                        |          |              |                 |                 |             |                         |                |                |                |                |               |               |             |             |        |        |      |      |     |     |     |     |        |     |
| 2               | Cigarro-puro                                                                                                    |                                                                                                                      |                                                                                                                                                                                                                                                                                                                                                                                                                                                                                                                                                                                                                                                                                                                                       |     |             |     |              |     |                        |          |              |                 |                 |             |                         |                |                |                |                |               |               |             |             |        |        |      |      |     |     |     |     |        |     |
| 3               | Pipa                                                                                                            |                                                                                                                      |                                                                                                                                                                                                                                                                                                                                                                                                                                                                                                                                                                                                                                                                                                                                       |     |             |     |              |     |                        |          |              |                 |                 |             |                         |                |                |                |                |               |               |             |             |        |        |      |      |     |     |     |     |        |     |
| 4               | Pipa de agua                                                                                                    |                                                                                                                      |                                                                                                                                                                                                                                                                                                                                                                                                                                                                                                                                                                                                                                                                                                                                       |     |             |     |              |     |                        |          |              |                 |                 |             |                         |                |                |                |                |               |               |             |             |        |        |      |      |     |     |     |     |        |     |
| 5               | Vaporizador                                                                                                     |                                                                                                                      |                                                                                                                                                                                                                                                                                                                                                                                                                                                                                                                                                                                                                                                                                                                                       |     |             |     |              |     |                        |          |              |                 |                 |             |                         |                |                |                |                |               |               |             |             |        |        |      |      |     |     |     |     |        |     |
| 99              | Otro producto de tabaco                                                                                         |                                                                                                                      |                                                                                                                                                                                                                                                                                                                                                                                                                                                                                                                                                                                                                                                                                                                                       |     |             |     |              |     |                        |          |              |                 |                 |             |                         |                |                |                |                |               |               |             |             |        |        |      |      |     |     |     |     |        |     |

23/10/2020

FONIS TABACO V2.0 | REDCap

|     |                                                                                                                                                                                                                                                                                                                                                                                          |                                                                                                             |                                                                                                                                                                                                                                                                                                                                                                            |   |                 |   |              |    |      |   |              |   |          |   |           |   |               |    |      |   |               |
|-----|------------------------------------------------------------------------------------------------------------------------------------------------------------------------------------------------------------------------------------------------------------------------------------------------------------------------------------------------------------------------------------------|-------------------------------------------------------------------------------------------------------------|----------------------------------------------------------------------------------------------------------------------------------------------------------------------------------------------------------------------------------------------------------------------------------------------------------------------------------------------------------------------------|---|-----------------|---|--------------|----|------|---|--------------|---|----------|---|-----------|---|---------------|----|------|---|---------------|
| 146 | <div>ftabaco_marca</div> <div>Mostrar el archivo SÓLO si:<br/>[ftabaco_tipo]='1'</div>                                                                                                                                                                                                                                                                                                   | 11.- Si es de cigarrillos ¿Qué marca de cigarrillos?                                                        | <div>radio</div> <table><tr><td>1</td><td>Dunhill</td></tr><tr><td>2</td><td>Kent</td></tr><tr><td>3</td><td>L&amp;M</td></tr><tr><td>4</td><td>Lucky Strike</td></tr><tr><td>5</td><td>Marlboro</td></tr><tr><td>6</td><td>Pall Mall</td></tr><tr><td>7</td><td>Philip Morris</td></tr><tr><td>99</td><td>Otra</td></tr><tr><td>0</td><td>Indeterminada</td></tr></table> | 1 | Dunhill         | 2 | Kent         | 3  | L&M  | 4 | Lucky Strike | 5 | Marlboro | 6 | Pall Mall | 7 | Philip Morris | 99 | Otra | 0 | Indeterminada |
| 1   | Dunhill                                                                                                                                                                                                                                                                                                                                                                                  |                                                                                                             |                                                                                                                                                                                                                                                                                                                                                                            |   |                 |   |              |    |      |   |              |   |          |   |           |   |               |    |      |   |               |
| 2   | Kent                                                                                                                                                                                                                                                                                                                                                                                     |                                                                                                             |                                                                                                                                                                                                                                                                                                                                                                            |   |                 |   |              |    |      |   |              |   |          |   |           |   |               |    |      |   |               |
| 3   | L&M                                                                                                                                                                                                                                                                                                                                                                                      |                                                                                                             |                                                                                                                                                                                                                                                                                                                                                                            |   |                 |   |              |    |      |   |              |   |          |   |           |   |               |    |      |   |               |
| 4   | Lucky Strike                                                                                                                                                                                                                                                                                                                                                                             |                                                                                                             |                                                                                                                                                                                                                                                                                                                                                                            |   |                 |   |              |    |      |   |              |   |          |   |           |   |               |    |      |   |               |
| 5   | Marlboro                                                                                                                                                                                                                                                                                                                                                                                 |                                                                                                             |                                                                                                                                                                                                                                                                                                                                                                            |   |                 |   |              |    |      |   |              |   |          |   |           |   |               |    |      |   |               |
| 6   | Pall Mall                                                                                                                                                                                                                                                                                                                                                                                |                                                                                                             |                                                                                                                                                                                                                                                                                                                                                                            |   |                 |   |              |    |      |   |              |   |          |   |           |   |               |    |      |   |               |
| 7   | Philip Morris                                                                                                                                                                                                                                                                                                                                                                            |                                                                                                             |                                                                                                                                                                                                                                                                                                                                                                            |   |                 |   |              |    |      |   |              |   |          |   |           |   |               |    |      |   |               |
| 99  | Otra                                                                                                                                                                                                                                                                                                                                                                                     |                                                                                                             |                                                                                                                                                                                                                                                                                                                                                                            |   |                 |   |              |    |      |   |              |   |          |   |           |   |               |    |      |   |               |
| 0   | Indeterminada                                                                                                                                                                                                                                                                                                                                                                            |                                                                                                             |                                                                                                                                                                                                                                                                                                                                                                            |   |                 |   |              |    |      |   |              |   |          |   |           |   |               |    |      |   |               |
| 147 | <div>fotra_marca_cig</div> <div>Mostrar el archivo SÓLO si:<br/>[ftabaco_marca]=99</div>                                                                                                                                                                                                                                                                                                 | 11.1.- Otra marca de cigariillo:                                                                            | text                                                                                                                                                                                                                                                                                                                                                                       |   |                 |   |              |    |      |   |              |   |          |   |           |   |               |    |      |   |               |
| 148 | <div>fprograma_sn</div> <div>Mostrar el archivo SÓLO si:<br/>[fminuto]='0' and ([femision]='0' or ([ftabaco_sn]='0' or [ftabaco_sn]='2' or [ftabaco_tipo]&lt;&gt;' or [ftabaco_marca]&lt;&gt;')) or ([fminuto]&lt;&gt;'0' and ([femision]='0' or ([ftabaco_sn]='0' or [ftabaco_sn]='2' or [ftabaco_tipo]&lt;&gt;' or [ftabaco_marca]&lt;&gt;')) and [frespuestas_iguales]&lt;'1'))</div> | 12.- En este minuto ¿ves o escuchas, aunque no sea en su totalidad (por al menos 10 segundos), un programa? | <div>radio</div> <table><tr><td>1</td><td>Sí</td></tr><tr><td>0</td><td>No</td></tr></table>                                                                                                                                                                                                                                                                               | 1 | Sí              | 0 | No           |    |      |   |              |   |          |   |           |   |               |    |      |   |               |
| 1   | Sí                                                                                                                                                                                                                                                                                                                                                                                       |                                                                                                             |                                                                                                                                                                                                                                                                                                                                                                            |   |                 |   |              |    |      |   |              |   |          |   |           |   |               |    |      |   |               |
| 0   | No                                                                                                                                                                                                                                                                                                                                                                                       |                                                                                                             |                                                                                                                                                                                                                                                                                                                                                                            |   |                 |   |              |    |      |   |              |   |          |   |           |   |               |    |      |   |               |
| 149 | <div>fnoyno</div> <div>Mostrar el archivo SÓLO si:<br/>[femision]='0' and [fprograma_sn]='0'</div>                                                                                                                                                                                                                                                                                       | DEBES SELECCIONAR QUE VISTE UN ANUNCIO O UN PROGRAMA, NO ES POSIBLE QUE LA RESPUESTA SEA NEGATIVA A AMBOS.  | descriptive                                                                                                                                                                                                                                                                                                                                                                |   |                 |   |              |    |      |   |              |   |          |   |           |   |               |    |      |   |               |
| 150 | <div>fmismo_programa</div> <div>Mostrar el archivo SÓLO si:<br/>[fprograma_sn]='1' AND [fminuto]&lt;&gt;'0'</div>                                                                                                                                                                                                                                                                        | 13.- ¿el programa que ves en este minuto es el mismo que has observado en el minuto anterior?               | <div>yesno</div> <table><tr><td>1</td><td>Si</td></tr><tr><td>0</td><td>No</td></tr></table>                                                                                                                                                                                                                                                                               | 1 | Si              | 0 | No           |    |      |   |              |   |          |   |           |   |               |    |      |   |               |
| 1   | Si                                                                                                                                                                                                                                                                                                                                                                                       |                                                                                                             |                                                                                                                                                                                                                                                                                                                                                                            |   |                 |   |              |    |      |   |              |   |          |   |           |   |               |    |      |   |               |
| 0   | No                                                                                                                                                                                                                                                                                                                                                                                       |                                                                                                             |                                                                                                                                                                                                                                                                                                                                                                            |   |                 |   |              |    |      |   |              |   |          |   |           |   |               |    |      |   |               |
| 151 | <div>fnombre_prog</div> <div>Mostrar el archivo SÓLO si:<br/>[fprograma_sn]='1' and ([fminuto]='0' or [fmismo_programa]='0')</div>                                                                                                                                                                                                                                                       | 14.- ¿Qué nombre tiene el programa? (Debe responder esta pregunta CON mayúsculas, sin tildes sin símbolos)  | text, Required                                                                                                                                                                                                                                                                                                                                                             |   |                 |   |              |    |      |   |              |   |          |   |           |   |               |    |      |   |               |
| 152 | <div>fprograma_genero</div> <div>Mostrar el archivo SÓLO si:<br/>([fminuto]='0' and [fprograma_sn]='1') or ([fminuto]&lt;&gt;'0' and [frespuestas_iguales]&lt;'1' and [fmismo_programa]='0' and [fprograma_sn]='1')</div>                                                                                                                                                                | 15.- ¿A que tipo de género corresponde el programa?                                                         | <div>radio</div> <table><tr><td>1</td><td>Entretenimiento</td></tr><tr><td>2</td><td>Informativos</td></tr><tr><td>99</td><td>Otro</td></tr></table>                                                                                                                                                                                                                       | 1 | Entretenimiento | 2 | Informativos | 99 | Otro |   |              |   |          |   |           |   |               |    |      |   |               |
| 1   | Entretenimiento                                                                                                                                                                                                                                                                                                                                                                          |                                                                                                             |                                                                                                                                                                                                                                                                                                                                                                            |   |                 |   |              |    |      |   |              |   |          |   |           |   |               |    |      |   |               |
| 2   | Informativos                                                                                                                                                                                                                                                                                                                                                                             |                                                                                                             |                                                                                                                                                                                                                                                                                                                                                                            |   |                 |   |              |    |      |   |              |   |          |   |           |   |               |    |      |   |               |
| 99  | Otro                                                                                                                                                                                                                                                                                                                                                                                     |                                                                                                             |                                                                                                                                                                                                                                                                                                                                                                            |   |                 |   |              |    |      |   |              |   |          |   |           |   |               |    |      |   |               |
| 153 | <div>ftorpedo_continua</div>                                                                                                                                                                                                                                                                                                                                                             | CONTINUAR REVISIÓN EN 35                                                                                    | <div>descriptive</div> <div>Field Annotation: @HIDDEN</div>                                                                                                                                                                                                                                                                                                                |   |                 |   |              |    |      |   |              |   |          |   |           |   |               |    |      |   |               |

23/10/2020

FONIS TABACO V2.0 | REDCap

|            |                                                                                                                                                                                     |                                                                                                                                        |                                                                                                                                                                                                                                                                                                                                                                                                                                                                                                                       |   |                |           |                                                 |            |                                                      |          |                        |   |              |   |          |   |             |   |          |   |         |    |                    |
|------------|-------------------------------------------------------------------------------------------------------------------------------------------------------------------------------------|----------------------------------------------------------------------------------------------------------------------------------------|-----------------------------------------------------------------------------------------------------------------------------------------------------------------------------------------------------------------------------------------------------------------------------------------------------------------------------------------------------------------------------------------------------------------------------------------------------------------------------------------------------------------------|---|----------------|-----------|-------------------------------------------------|------------|------------------------------------------------------|----------|------------------------|---|--------------|---|----------|---|-------------|---|----------|---|---------|----|--------------------|
| 154        | fprograma_subgenero<br>Mostrar el archivo SÓLO si:<br>[fprograma_genero]='1'                                                                                                        | 16.- ¿Qué tipo de subgénero de entretenimiento es?                                                                                     | radio<br><table border="1"> <tr><td>1</td><td>Dibujo animado</td></tr> <tr><td>2</td><td>Película o telefilm no seriados (sin animación)</td></tr> <tr><td>3</td><td>Telenovelas (sin animación)</td></tr> <tr><td>4</td><td>Series (Sin animación)</td></tr> <tr><td>5</td><td>Reality show</td></tr> <tr><td>6</td><td>Concurso</td></tr> <tr><td>7</td><td>Humorístico</td></tr> <tr><td>8</td><td>Deportes</td></tr> <tr><td>9</td><td>Musical</td></tr> <tr><td>10</td><td>Variedades y otros</td></tr> </table> | 1 | Dibujo animado | 2         | Película o telefilm no seriados (sin animación) | 3          | Telenovelas (sin animación)                          | 4        | Series (Sin animación) | 5 | Reality show | 6 | Concurso | 7 | Humorístico | 8 | Deportes | 9 | Musical | 10 | Variedades y otros |
| 1          | Dibujo animado                                                                                                                                                                      |                                                                                                                                        |                                                                                                                                                                                                                                                                                                                                                                                                                                                                                                                       |   |                |           |                                                 |            |                                                      |          |                        |   |              |   |          |   |             |   |          |   |         |    |                    |
| 2          | Película o telefilm no seriados (sin animación)                                                                                                                                     |                                                                                                                                        |                                                                                                                                                                                                                                                                                                                                                                                                                                                                                                                       |   |                |           |                                                 |            |                                                      |          |                        |   |              |   |          |   |             |   |          |   |         |    |                    |
| 3          | Telenovelas (sin animación)                                                                                                                                                         |                                                                                                                                        |                                                                                                                                                                                                                                                                                                                                                                                                                                                                                                                       |   |                |           |                                                 |            |                                                      |          |                        |   |              |   |          |   |             |   |          |   |         |    |                    |
| 4          | Series (Sin animación)                                                                                                                                                              |                                                                                                                                        |                                                                                                                                                                                                                                                                                                                                                                                                                                                                                                                       |   |                |           |                                                 |            |                                                      |          |                        |   |              |   |          |   |             |   |          |   |         |    |                    |
| 5          | Reality show                                                                                                                                                                        |                                                                                                                                        |                                                                                                                                                                                                                                                                                                                                                                                                                                                                                                                       |   |                |           |                                                 |            |                                                      |          |                        |   |              |   |          |   |             |   |          |   |         |    |                    |
| 6          | Concurso                                                                                                                                                                            |                                                                                                                                        |                                                                                                                                                                                                                                                                                                                                                                                                                                                                                                                       |   |                |           |                                                 |            |                                                      |          |                        |   |              |   |          |   |             |   |          |   |         |    |                    |
| 7          | Humorístico                                                                                                                                                                         |                                                                                                                                        |                                                                                                                                                                                                                                                                                                                                                                                                                                                                                                                       |   |                |           |                                                 |            |                                                      |          |                        |   |              |   |          |   |             |   |          |   |         |    |                    |
| 8          | Deportes                                                                                                                                                                            |                                                                                                                                        |                                                                                                                                                                                                                                                                                                                                                                                                                                                                                                                       |   |                |           |                                                 |            |                                                      |          |                        |   |              |   |          |   |             |   |          |   |         |    |                    |
| 9          | Musical                                                                                                                                                                             |                                                                                                                                        |                                                                                                                                                                                                                                                                                                                                                                                                                                                                                                                       |   |                |           |                                                 |            |                                                      |          |                        |   |              |   |          |   |             |   |          |   |         |    |                    |
| 10         | Variedades y otros                                                                                                                                                                  |                                                                                                                                        |                                                                                                                                                                                                                                                                                                                                                                                                                                                                                                                       |   |                |           |                                                 |            |                                                      |          |                        |   |              |   |          |   |             |   |          |   |         |    |                    |
| 155        | finformativo_tipo<br>Mostrar el archivo SÓLO si:<br>[fprograma_genero]='2'                                                                                                          | 17.- ¿Qué tipo de subgénero informativo es?                                                                                            | radio<br><table border="1"> <tr><td>4</td><td>Noticiario</td></tr> <tr><td>Reportaje</td><td>documental, informes periodísticos y similares</td></tr> <tr><td>Entrevista</td><td>rueda informativa, conferencia de prensa y similares</td></tr> <tr><td>Coloquio</td><td>debate y similares</td></tr> <tr><td>5</td><td>Otro</td></tr> </table>                                                                                                                                                                       | 4 | Noticiario     | Reportaje | documental, informes periodísticos y similares  | Entrevista | rueda informativa, conferencia de prensa y similares | Coloquio | debate y similares     | 5 | Otro         |   |          |   |             |   |          |   |         |    |                    |
| 4          | Noticiario                                                                                                                                                                          |                                                                                                                                        |                                                                                                                                                                                                                                                                                                                                                                                                                                                                                                                       |   |                |           |                                                 |            |                                                      |          |                        |   |              |   |          |   |             |   |          |   |         |    |                    |
| Reportaje  | documental, informes periodísticos y similares                                                                                                                                      |                                                                                                                                        |                                                                                                                                                                                                                                                                                                                                                                                                                                                                                                                       |   |                |           |                                                 |            |                                                      |          |                        |   |              |   |          |   |             |   |          |   |         |    |                    |
| Entrevista | rueda informativa, conferencia de prensa y similares                                                                                                                                |                                                                                                                                        |                                                                                                                                                                                                                                                                                                                                                                                                                                                                                                                       |   |                |           |                                                 |            |                                                      |          |                        |   |              |   |          |   |             |   |          |   |         |    |                    |
| Coloquio   | debate y similares                                                                                                                                                                  |                                                                                                                                        |                                                                                                                                                                                                                                                                                                                                                                                                                                                                                                                       |   |                |           |                                                 |            |                                                      |          |                        |   |              |   |          |   |             |   |          |   |         |    |                    |
| 5          | Otro                                                                                                                                                                                |                                                                                                                                        |                                                                                                                                                                                                                                                                                                                                                                                                                                                                                                                       |   |                |           |                                                 |            |                                                      |          |                        |   |              |   |          |   |             |   |          |   |         |    |                    |
| 156        | fprograma_otro_subgenero<br>Mostrar el archivo SÓLO si:<br>[fprograma_genero]='99'                                                                                                  | 18.- Si es un programa de otro género ¿Qué tipo de subgénero es?                                                                       | radio<br><table border="1"> <tr><td>1</td><td>Educativo</td></tr> <tr><td>2</td><td>Estilo de vida</td></tr> <tr><td>3</td><td>Religión</td></tr> <tr><td>4</td><td>Otro</td></tr> </table>                                                                                                                                                                                                                                                                                                                           | 1 | Educativo      | 2         | Estilo de vida                                  | 3          | Religión                                             | 4        | Otro                   |   |              |   |          |   |             |   |          |   |         |    |                    |
| 1          | Educativo                                                                                                                                                                           |                                                                                                                                        |                                                                                                                                                                                                                                                                                                                                                                                                                                                                                                                       |   |                |           |                                                 |            |                                                      |          |                        |   |              |   |          |   |             |   |          |   |         |    |                    |
| 2          | Estilo de vida                                                                                                                                                                      |                                                                                                                                        |                                                                                                                                                                                                                                                                                                                                                                                                                                                                                                                       |   |                |           |                                                 |            |                                                      |          |                        |   |              |   |          |   |             |   |          |   |         |    |                    |
| 3          | Religión                                                                                                                                                                            |                                                                                                                                        |                                                                                                                                                                                                                                                                                                                                                                                                                                                                                                                       |   |                |           |                                                 |            |                                                      |          |                        |   |              |   |          |   |             |   |          |   |         |    |                    |
| 4          | Otro                                                                                                                                                                                |                                                                                                                                        |                                                                                                                                                                                                                                                                                                                                                                                                                                                                                                                       |   |                |           |                                                 |            |                                                      |          |                        |   |              |   |          |   |             |   |          |   |         |    |                    |
| 157        | fproduccion_chilena<br>Mostrar el archivo SÓLO si:<br>[fprograma_subgenero]<>" or [finformativo_tipo]<>" or [fprograma_otro_subgenero]<>"                                           | 19.- ¿El programa es una producción chilena?                                                                                           | radio<br><table border="1"> <tr><td>1</td><td>Sí</td></tr> <tr><td>0</td><td>No</td></tr> <tr><td>2</td><td>No se sabe</td></tr> </table>                                                                                                                                                                                                                                                                                                                                                                             | 1 | Sí             | 0         | No                                              | 2          | No se sabe                                           |          |                        |   |              |   |          |   |             |   |          |   |         |    |                    |
| 1          | Sí                                                                                                                                                                                  |                                                                                                                                        |                                                                                                                                                                                                                                                                                                                                                                                                                                                                                                                       |   |                |           |                                                 |            |                                                      |          |                        |   |              |   |          |   |             |   |          |   |         |    |                    |
| 0          | No                                                                                                                                                                                  |                                                                                                                                        |                                                                                                                                                                                                                                                                                                                                                                                                                                                                                                                       |   |                |           |                                                 |            |                                                      |          |                        |   |              |   |          |   |             |   |          |   |         |    |                    |
| 2          | No se sabe                                                                                                                                                                          |                                                                                                                                        |                                                                                                                                                                                                                                                                                                                                                                                                                                                                                                                       |   |                |           |                                                 |            |                                                      |          |                        |   |              |   |          |   |             |   |          |   |         |    |                    |
| 158        | fen_espaniol<br>Mostrar el archivo SÓLO si:<br>[fproduccion_chilena]<>"                                                                                                             | 20.- ¿El programa se escucha en español?                                                                                               | yesno<br><table border="1"> <tr><td>1</td><td>Sí</td></tr> <tr><td>0</td><td>No</td></tr> </table>                                                                                                                                                                                                                                                                                                                                                                                                                    | 1 | Sí             | 0         | No                                              |            |                                                      |          |                        |   |              |   |          |   |             |   |          |   |         |    |                    |
| 1          | Sí                                                                                                                                                                                  |                                                                                                                                        |                                                                                                                                                                                                                                                                                                                                                                                                                                                                                                                       |   |                |           |                                                 |            |                                                      |          |                        |   |              |   |          |   |             |   |          |   |         |    |                    |
| 0          | No                                                                                                                                                                                  |                                                                                                                                        |                                                                                                                                                                                                                                                                                                                                                                                                                                                                                                                       |   |                |           |                                                 |            |                                                      |          |                        |   |              |   |          |   |             |   |          |   |         |    |                    |
| 159        | ftabaco_explicito<br>Mostrar el archivo SÓLO si:<br>([fminuto]='0' and [fen_espaniol]<>" ) or ([fminuto]<>'0' and [fmismo_programa]='1') or ([fminuto]<>'0' and [fen_espaniol]<>" ) | 21.- ¿Observa el uso explícito de tabaco en este minuto?                                                                               | yesno<br><table border="1"> <tr><td>1</td><td>Sí</td></tr> <tr><td>0</td><td>No</td></tr> </table>                                                                                                                                                                                                                                                                                                                                                                                                                    | 1 | Sí             | 0         | No                                              |            |                                                      |          |                        |   |              |   |          |   |             |   |          |   |         |    |                    |
| 1          | Sí                                                                                                                                                                                  |                                                                                                                                        |                                                                                                                                                                                                                                                                                                                                                                                                                                                                                                                       |   |                |           |                                                 |            |                                                      |          |                        |   |              |   |          |   |             |   |          |   |         |    |                    |
| 0          | No                                                                                                                                                                                  |                                                                                                                                        |                                                                                                                                                                                                                                                                                                                                                                                                                                                                                                                       |   |                |           |                                                 |            |                                                      |          |                        |   |              |   |          |   |             |   |          |   |         |    |                    |
| 160        | ftabaco_personas_cant<br>Mostrar el archivo SÓLO si:<br>[ftabaco_explicito]='1'                                                                                                     | 22.- ¿Cuántas personas o personajes usan tabaco explícitamente en este minuto?<br><i>SI SON TRES O MÁS ELIJA A LOS DOS PRINCIPALES</i> | radio<br><table border="1"> <tr><td>1</td><td>1</td></tr> <tr><td>2</td><td>2 o más</td></tr> </table>                                                                                                                                                                                                                                                                                                                                                                                                                | 1 | 1              | 2         | 2 o más                                         |            |                                                      |          |                        |   |              |   |          |   |             |   |          |   |         |    |                    |
| 1          | 1                                                                                                                                                                                   |                                                                                                                                        |                                                                                                                                                                                                                                                                                                                                                                                                                                                                                                                       |   |                |           |                                                 |            |                                                      |          |                        |   |              |   |          |   |             |   |          |   |         |    |                    |
| 2          | 2 o más                                                                                                                                                                             |                                                                                                                                        |                                                                                                                                                                                                                                                                                                                                                                                                                                                                                                                       |   |                |           |                                                 |            |                                                      |          |                        |   |              |   |          |   |             |   |          |   |         |    |                    |
| 161        | ftxt_personaje_1<br>Mostrar el archivo SÓLO si:<br>[ftabaco_personas_cant]='1' o r [ftabaco_personas_cant]='2'                                                                      | Personaje 1                                                                                                                            | descriptive                                                                                                                                                                                                                                                                                                                                                                                                                                                                                                           |   |                |           |                                                 |            |                                                      |          |                        |   |              |   |          |   |             |   |          |   |         |    |                    |
| 162        | fnombre_personaje<br>Mostrar el archivo SÓLO si:<br>[ftabaco_personas_cant]='1' o r [ftabaco_personas_cant]='2'                                                                     | 23.- ¿Cómo se llama el personaje? (debe responder esta pregunta CON mayúsculas, sin tilde y sin símbolos).                             | text                                                                                                                                                                                                                                                                                                                                                                                                                                                                                                                  |   |                |           |                                                 |            |                                                      |          |                        |   |              |   |          |   |             |   |          |   |         |    |                    |

23/10/2020

FONIS TABACO V2.0 | REDCap

|     |                                                                                                                                                          |                                                                                      |                                                                                                                                                                                                                                                                                                                                                                                                                                                                                                                                                                                                                                                                                                          |   |                                       |   |                                  |   |                                  |   |                                          |   |                                                        |    |                                |   |                           |   |                                                  |   |                                         |    |                        |
|-----|----------------------------------------------------------------------------------------------------------------------------------------------------------|--------------------------------------------------------------------------------------|----------------------------------------------------------------------------------------------------------------------------------------------------------------------------------------------------------------------------------------------------------------------------------------------------------------------------------------------------------------------------------------------------------------------------------------------------------------------------------------------------------------------------------------------------------------------------------------------------------------------------------------------------------------------------------------------------------|---|---------------------------------------|---|----------------------------------|---|----------------------------------|---|------------------------------------------|---|--------------------------------------------------------|----|--------------------------------|---|---------------------------|---|--------------------------------------------------|---|-----------------------------------------|----|------------------------|
| 163 | ftabaco_tipo_p1<br>Mostrar el archivo SÓLO si:<br>[ftabaco_personas_cant]='1' o<br>r [ftabaco_personas_cant]='2'                                         | 24.- ¿Qué tipo de tabaco usa la persona o personaje en pantalla durante este minuto? | radio<br><table border="1"> <tr><td>1</td><td>Cigarrillo</td></tr> <tr><td>2</td><td>Cigarro-puro</td></tr> <tr><td>3</td><td>Pipa</td></tr> <tr><td>4</td><td>Pipa de agua</td></tr> <tr><td>5</td><td>Vaporizador</td></tr> <tr><td>99</td><td>Otro producto de tabaco</td></tr> </table>                                                                                                                                                                                                                                                                                                                                                                                                              | 1 | Cigarrillo                            | 2 | Cigarro-puro                     | 3 | Pipa                             | 4 | Pipa de agua                             | 5 | Vaporizador                                            | 99 | Otro producto de tabaco        |   |                           |   |                                                  |   |                                         |    |                        |
| 1   | Cigarrillo                                                                                                                                               |                                                                                      |                                                                                                                                                                                                                                                                                                                                                                                                                                                                                                                                                                                                                                                                                                          |   |                                       |   |                                  |   |                                  |   |                                          |   |                                                        |    |                                |   |                           |   |                                                  |   |                                         |    |                        |
| 2   | Cigarro-puro                                                                                                                                             |                                                                                      |                                                                                                                                                                                                                                                                                                                                                                                                                                                                                                                                                                                                                                                                                                          |   |                                       |   |                                  |   |                                  |   |                                          |   |                                                        |    |                                |   |                           |   |                                                  |   |                                         |    |                        |
| 3   | Pipa                                                                                                                                                     |                                                                                      |                                                                                                                                                                                                                                                                                                                                                                                                                                                                                                                                                                                                                                                                                                          |   |                                       |   |                                  |   |                                  |   |                                          |   |                                                        |    |                                |   |                           |   |                                                  |   |                                         |    |                        |
| 4   | Pipa de agua                                                                                                                                             |                                                                                      |                                                                                                                                                                                                                                                                                                                                                                                                                                                                                                                                                                                                                                                                                                          |   |                                       |   |                                  |   |                                  |   |                                          |   |                                                        |    |                                |   |                           |   |                                                  |   |                                         |    |                        |
| 5   | Vaporizador                                                                                                                                              |                                                                                      |                                                                                                                                                                                                                                                                                                                                                                                                                                                                                                                                                                                                                                                                                                          |   |                                       |   |                                  |   |                                  |   |                                          |   |                                                        |    |                                |   |                           |   |                                                  |   |                                         |    |                        |
| 99  | Otro producto de tabaco                                                                                                                                  |                                                                                      |                                                                                                                                                                                                                                                                                                                                                                                                                                                                                                                                                                                                                                                                                                          |   |                                       |   |                                  |   |                                  |   |                                          |   |                                                        |    |                                |   |                           |   |                                                  |   |                                         |    |                        |
| 164 | fpapel_p1<br>Mostrar el archivo SÓLO si:<br>[ftabaco_personas_cant]='1' o<br>r [ftabaco_personas_cant]='2'                                               | 25.- ¿Qué papel tiene el personaje en la trama?                                      | radio<br><table border="1"> <tr><td>1</td><td>Principal</td></tr> <tr><td>2</td><td>Secundario</td></tr> <tr><td>3</td><td>Terciario o extra</td></tr> <tr><td>4</td><td>No se puede determinar</td></tr> </table>                                                                                                                                                                                                                                                                                                                                                                                                                                                                                       | 1 | Principal                             | 2 | Secundario                       | 3 | Terciario o extra                | 4 | No se puede determinar                   |   |                                                        |    |                                |   |                           |   |                                                  |   |                                         |    |                        |
| 1   | Principal                                                                                                                                                |                                                                                      |                                                                                                                                                                                                                                                                                                                                                                                                                                                                                                                                                                                                                                                                                                          |   |                                       |   |                                  |   |                                  |   |                                          |   |                                                        |    |                                |   |                           |   |                                                  |   |                                         |    |                        |
| 2   | Secundario                                                                                                                                               |                                                                                      |                                                                                                                                                                                                                                                                                                                                                                                                                                                                                                                                                                                                                                                                                                          |   |                                       |   |                                  |   |                                  |   |                                          |   |                                                        |    |                                |   |                           |   |                                                  |   |                                         |    |                        |
| 3   | Terciario o extra                                                                                                                                        |                                                                                      |                                                                                                                                                                                                                                                                                                                                                                                                                                                                                                                                                                                                                                                                                                          |   |                                       |   |                                  |   |                                  |   |                                          |   |                                                        |    |                                |   |                           |   |                                                  |   |                                         |    |                        |
| 4   | No se puede determinar                                                                                                                                   |                                                                                      |                                                                                                                                                                                                                                                                                                                                                                                                                                                                                                                                                                                                                                                                                                          |   |                                       |   |                                  |   |                                  |   |                                          |   |                                                        |    |                                |   |                           |   |                                                  |   |                                         |    |                        |
| 165 | fedad_p1<br>Mostrar el archivo SÓLO si:<br>[ftabaco_personas_cant]='1' o<br>r [ftabaco_personas_cant]='2'                                                | 26.- ¿Qué edad parece tener el personaje?                                            | radio<br><table border="1"> <tr><td>1</td><td>Menor de edad &gt;18</td></tr> <tr><td>2</td><td>Adulto joven 18-39</td></tr> <tr><td>3</td><td>Adulto maduro 40-64</td></tr> <tr><td>4</td><td>Adulto mayor 65+</td></tr> <tr><td>5</td><td>No se puede determinar</td></tr> </table>                                                                                                                                                                                                                                                                                                                                                                                                                     | 1 | Menor de edad >18                     | 2 | Adulto joven 18-39               | 3 | Adulto maduro 40-64              | 4 | Adulto mayor 65+                         | 5 | No se puede determinar                                 |    |                                |   |                           |   |                                                  |   |                                         |    |                        |
| 1   | Menor de edad >18                                                                                                                                        |                                                                                      |                                                                                                                                                                                                                                                                                                                                                                                                                                                                                                                                                                                                                                                                                                          |   |                                       |   |                                  |   |                                  |   |                                          |   |                                                        |    |                                |   |                           |   |                                                  |   |                                         |    |                        |
| 2   | Adulto joven 18-39                                                                                                                                       |                                                                                      |                                                                                                                                                                                                                                                                                                                                                                                                                                                                                                                                                                                                                                                                                                          |   |                                       |   |                                  |   |                                  |   |                                          |   |                                                        |    |                                |   |                           |   |                                                  |   |                                         |    |                        |
| 3   | Adulto maduro 40-64                                                                                                                                      |                                                                                      |                                                                                                                                                                                                                                                                                                                                                                                                                                                                                                                                                                                                                                                                                                          |   |                                       |   |                                  |   |                                  |   |                                          |   |                                                        |    |                                |   |                           |   |                                                  |   |                                         |    |                        |
| 4   | Adulto mayor 65+                                                                                                                                         |                                                                                      |                                                                                                                                                                                                                                                                                                                                                                                                                                                                                                                                                                                                                                                                                                          |   |                                       |   |                                  |   |                                  |   |                                          |   |                                                        |    |                                |   |                           |   |                                                  |   |                                         |    |                        |
| 5   | No se puede determinar                                                                                                                                   |                                                                                      |                                                                                                                                                                                                                                                                                                                                                                                                                                                                                                                                                                                                                                                                                                          |   |                                       |   |                                  |   |                                  |   |                                          |   |                                                        |    |                                |   |                           |   |                                                  |   |                                         |    |                        |
| 166 | fsexo_biologico_p1<br>Mostrar el archivo SÓLO si:<br>[ftabaco_personas_cant]='1' o<br>r [ftabaco_personas_cant]='2'                                      | 27.- ¿Qué sexo biológico parecer tener el personaje?                                 | radio<br><table border="1"> <tr><td>1</td><td>Hombre</td></tr> <tr><td>2</td><td>Mujer</td></tr> <tr><td>3</td><td>No se puede determinar</td></tr> </table>                                                                                                                                                                                                                                                                                                                                                                                                                                                                                                                                             | 1 | Hombre                                | 2 | Mujer                            | 3 | No se puede determinar           |   |                                          |   |                                                        |    |                                |   |                           |   |                                                  |   |                                         |    |                        |
| 1   | Hombre                                                                                                                                                   |                                                                                      |                                                                                                                                                                                                                                                                                                                                                                                                                                                                                                                                                                                                                                                                                                          |   |                                       |   |                                  |   |                                  |   |                                          |   |                                                        |    |                                |   |                           |   |                                                  |   |                                         |    |                        |
| 2   | Mujer                                                                                                                                                    |                                                                                      |                                                                                                                                                                                                                                                                                                                                                                                                                                                                                                                                                                                                                                                                                                          |   |                                       |   |                                  |   |                                  |   |                                          |   |                                                        |    |                                |   |                           |   |                                                  |   |                                         |    |                        |
| 3   | No se puede determinar                                                                                                                                   |                                                                                      |                                                                                                                                                                                                                                                                                                                                                                                                                                                                                                                                                                                                                                                                                                          |   |                                       |   |                                  |   |                                  |   |                                          |   |                                                        |    |                                |   |                           |   |                                                  |   |                                         |    |                        |
| 167 | fuso_contexto_fisico_p1<br>Mostrar el archivo SÓLO si:<br>[ftabaco_personas_cant]='1' o<br>r [ftabaco_personas_cant]='2'                                 | 28.- ¿En qué ambiente físico usa tabaco el personaje en este minuto?                 | radio<br><table border="1"> <tr><td>1</td><td>En ambiente cerrado</td></tr> <tr><td>2</td><td>En ambiente semiabierto</td></tr> <tr><td>3</td><td>En ambiente abierto</td></tr> <tr><td>4</td><td>No se puede determinar</td></tr> </table>                                                                                                                                                                                                                                                                                                                                                                                                                                                              | 1 | En ambiente cerrado                   | 2 | En ambiente semiabierto          | 3 | En ambiente abierto              | 4 | No se puede determinar                   |   |                                                        |    |                                |   |                           |   |                                                  |   |                                         |    |                        |
| 1   | En ambiente cerrado                                                                                                                                      |                                                                                      |                                                                                                                                                                                                                                                                                                                                                                                                                                                                                                                                                                                                                                                                                                          |   |                                       |   |                                  |   |                                  |   |                                          |   |                                                        |    |                                |   |                           |   |                                                  |   |                                         |    |                        |
| 2   | En ambiente semiabierto                                                                                                                                  |                                                                                      |                                                                                                                                                                                                                                                                                                                                                                                                                                                                                                                                                                                                                                                                                                          |   |                                       |   |                                  |   |                                  |   |                                          |   |                                                        |    |                                |   |                           |   |                                                  |   |                                         |    |                        |
| 3   | En ambiente abierto                                                                                                                                      |                                                                                      |                                                                                                                                                                                                                                                                                                                                                                                                                                                                                                                                                                                                                                                                                                          |   |                                       |   |                                  |   |                                  |   |                                          |   |                                                        |    |                                |   |                           |   |                                                  |   |                                         |    |                        |
| 4   | No se puede determinar                                                                                                                                   |                                                                                      |                                                                                                                                                                                                                                                                                                                                                                                                                                                                                                                                                                                                                                                                                                          |   |                                       |   |                                  |   |                                  |   |                                          |   |                                                        |    |                                |   |                           |   |                                                  |   |                                         |    |                        |
| 168 | ftipo_local<br>Mostrar el archivo SÓLO si:<br>[fuso_contexto_fisico_p1]<>'3'<br>and ([ftabaco_personas_cant]<br>='1' or [ftabaco_personas_cant]<br>='2') | 29.- ¿En qué tipo de local usa tabaco el personaje en este minuto?                   | radio<br><table border="1"> <tr><td>1</td><td>En un hogar</td></tr> <tr><td>2</td><td>En un hotel o residencia</td></tr> <tr><td>3</td><td>En un bar, restaurante o similar</td></tr> <tr><td>4</td><td>En un establecimiento educativo superior</td></tr> <tr><td>5</td><td>En un establecimiento educativo de básica o secundaria</td></tr> <tr><td>6</td><td>En un establecimiento de salud</td></tr> <tr><td>7</td><td>En un medio de transporte</td></tr> <tr><td>8</td><td>En un lugar de trabajo no incluido anteriormente</td></tr> <tr><td>9</td><td>En otro lugar no incluido anteriormente</td></tr> <tr><td>10</td><td>No se puede determinar</td></tr> </table><br>alineación de encargo LV | 1 | En un hogar                           | 2 | En un hotel o residencia         | 3 | En un bar, restaurante o similar | 4 | En un establecimiento educativo superior | 5 | En un establecimiento educativo de básica o secundaria | 6  | En un establecimiento de salud | 7 | En un medio de transporte | 8 | En un lugar de trabajo no incluido anteriormente | 9 | En otro lugar no incluido anteriormente | 10 | No se puede determinar |
| 1   | En un hogar                                                                                                                                              |                                                                                      |                                                                                                                                                                                                                                                                                                                                                                                                                                                                                                                                                                                                                                                                                                          |   |                                       |   |                                  |   |                                  |   |                                          |   |                                                        |    |                                |   |                           |   |                                                  |   |                                         |    |                        |
| 2   | En un hotel o residencia                                                                                                                                 |                                                                                      |                                                                                                                                                                                                                                                                                                                                                                                                                                                                                                                                                                                                                                                                                                          |   |                                       |   |                                  |   |                                  |   |                                          |   |                                                        |    |                                |   |                           |   |                                                  |   |                                         |    |                        |
| 3   | En un bar, restaurante o similar                                                                                                                         |                                                                                      |                                                                                                                                                                                                                                                                                                                                                                                                                                                                                                                                                                                                                                                                                                          |   |                                       |   |                                  |   |                                  |   |                                          |   |                                                        |    |                                |   |                           |   |                                                  |   |                                         |    |                        |
| 4   | En un establecimiento educativo superior                                                                                                                 |                                                                                      |                                                                                                                                                                                                                                                                                                                                                                                                                                                                                                                                                                                                                                                                                                          |   |                                       |   |                                  |   |                                  |   |                                          |   |                                                        |    |                                |   |                           |   |                                                  |   |                                         |    |                        |
| 5   | En un establecimiento educativo de básica o secundaria                                                                                                   |                                                                                      |                                                                                                                                                                                                                                                                                                                                                                                                                                                                                                                                                                                                                                                                                                          |   |                                       |   |                                  |   |                                  |   |                                          |   |                                                        |    |                                |   |                           |   |                                                  |   |                                         |    |                        |
| 6   | En un establecimiento de salud                                                                                                                           |                                                                                      |                                                                                                                                                                                                                                                                                                                                                                                                                                                                                                                                                                                                                                                                                                          |   |                                       |   |                                  |   |                                  |   |                                          |   |                                                        |    |                                |   |                           |   |                                                  |   |                                         |    |                        |
| 7   | En un medio de transporte                                                                                                                                |                                                                                      |                                                                                                                                                                                                                                                                                                                                                                                                                                                                                                                                                                                                                                                                                                          |   |                                       |   |                                  |   |                                  |   |                                          |   |                                                        |    |                                |   |                           |   |                                                  |   |                                         |    |                        |
| 8   | En un lugar de trabajo no incluido anteriormente                                                                                                         |                                                                                      |                                                                                                                                                                                                                                                                                                                                                                                                                                                                                                                                                                                                                                                                                                          |   |                                       |   |                                  |   |                                  |   |                                          |   |                                                        |    |                                |   |                           |   |                                                  |   |                                         |    |                        |
| 9   | En otro lugar no incluido anteriormente                                                                                                                  |                                                                                      |                                                                                                                                                                                                                                                                                                                                                                                                                                                                                                                                                                                                                                                                                                          |   |                                       |   |                                  |   |                                  |   |                                          |   |                                                        |    |                                |   |                           |   |                                                  |   |                                         |    |                        |
| 10  | No se puede determinar                                                                                                                                   |                                                                                      |                                                                                                                                                                                                                                                                                                                                                                                                                                                                                                                                                                                                                                                                                                          |   |                                       |   |                                  |   |                                  |   |                                          |   |                                                        |    |                                |   |                           |   |                                                  |   |                                         |    |                        |
| 169 | ftabaco_solo_o<br>Mostrar el archivo SÓLO si:<br>[ftabaco_personas_cant]='1' o<br>r [ftabaco_personas_cant]='2'                                          | 30.- En este minuto ¿El personaje usa tabaco en presencia de otros?                  | radio<br><table border="1"> <tr><td>1</td><td>Sí, en presencia de uno o más menores</td></tr> <tr><td>2</td><td>Sí, en presencia sólo de adultos</td></tr> <tr><td>0</td><td>No</td></tr> <tr><td>4</td><td>No se puede determinar</td></tr> </table><br>alineación de encargo LV                                                                                                                                                                                                                                                                                                                                                                                                                        | 1 | Sí, en presencia de uno o más menores | 2 | Sí, en presencia sólo de adultos | 0 | No                               | 4 | No se puede determinar                   |   |                                                        |    |                                |   |                           |   |                                                  |   |                                         |    |                        |
| 1   | Sí, en presencia de uno o más menores                                                                                                                    |                                                                                      |                                                                                                                                                                                                                                                                                                                                                                                                                                                                                                                                                                                                                                                                                                          |   |                                       |   |                                  |   |                                  |   |                                          |   |                                                        |    |                                |   |                           |   |                                                  |   |                                         |    |                        |
| 2   | Sí, en presencia sólo de adultos                                                                                                                         |                                                                                      |                                                                                                                                                                                                                                                                                                                                                                                                                                                                                                                                                                                                                                                                                                          |   |                                       |   |                                  |   |                                  |   |                                          |   |                                                        |    |                                |   |                           |   |                                                  |   |                                         |    |                        |
| 0   | No                                                                                                                                                       |                                                                                      |                                                                                                                                                                                                                                                                                                                                                                                                                                                                                                                                                                                                                                                                                                          |   |                                       |   |                                  |   |                                  |   |                                          |   |                                                        |    |                                |   |                           |   |                                                  |   |                                         |    |                        |
| 4   | No se puede determinar                                                                                                                                   |                                                                                      |                                                                                                                                                                                                                                                                                                                                                                                                                                                                                                                                                                                                                                                                                                          |   |                                       |   |                                  |   |                                  |   |                                          |   |                                                        |    |                                |   |                           |   |                                                  |   |                                         |    |                        |

23/10/2020

FONIS TABACO V2.0 | REDCap

|     |                                                                                                                 |                                                                                                                                                                                                                                                            |                                                                                                                                                                                                                                                                                                                                                                                                                                                                                                                                                                                                                                                                                                                                                                                                                                                                                                                                                                        |   |                   |                                                                     |                    |                   |                                                                        |   |                        |                                                                          |                        |                   |                                                                                                                             |   |                   |                                       |   |                   |                                                                 |   |                   |                        |
|-----|-----------------------------------------------------------------------------------------------------------------|------------------------------------------------------------------------------------------------------------------------------------------------------------------------------------------------------------------------------------------------------------|------------------------------------------------------------------------------------------------------------------------------------------------------------------------------------------------------------------------------------------------------------------------------------------------------------------------------------------------------------------------------------------------------------------------------------------------------------------------------------------------------------------------------------------------------------------------------------------------------------------------------------------------------------------------------------------------------------------------------------------------------------------------------------------------------------------------------------------------------------------------------------------------------------------------------------------------------------------------|---|-------------------|---------------------------------------------------------------------|--------------------|-------------------|------------------------------------------------------------------------|---|------------------------|--------------------------------------------------------------------------|------------------------|-------------------|-----------------------------------------------------------------------------------------------------------------------------|---|-------------------|---------------------------------------|---|-------------------|-----------------------------------------------------------------|---|-------------------|------------------------|
| 170 | fno_fumadores_p1<br>Mostrar el archivo SÓLO si:<br>[ftabaco_personas_cant]='2'                                  | 31.- ¿Fuman todos los presentes?                                                                                                                                                                                                                           | yesno<br><table border="1"> <tr> <td>1</td> <td>Si</td> </tr> <tr> <td>0</td> <td>No</td> </tr> </table>                                                                                                                                                                                                                                                                                                                                                                                                                                                                                                                                                                                                                                                                                                                                                                                                                                                               | 1 | Si                | 0                                                                   | No                 |                   |                                                                        |   |                        |                                                                          |                        |                   |                                                                                                                             |   |                   |                                       |   |                   |                                                                 |   |                   |                        |
| 1   | Si                                                                                                              |                                                                                                                                                                                                                                                            |                                                                                                                                                                                                                                                                                                                                                                                                                                                                                                                                                                                                                                                                                                                                                                                                                                                                                                                                                                        |   |                   |                                                                     |                    |                   |                                                                        |   |                        |                                                                          |                        |                   |                                                                                                                             |   |                   |                                       |   |                   |                                                                 |   |                   |                        |
| 0   | No                                                                                                              |                                                                                                                                                                                                                                                            |                                                                                                                                                                                                                                                                                                                                                                                                                                                                                                                                                                                                                                                                                                                                                                                                                                                                                                                                                                        |   |                   |                                                                     |                    |                   |                                                                        |   |                        |                                                                          |                        |                   |                                                                                                                             |   |                   |                                       |   |                   |                                                                 |   |                   |                        |
| 171 | ftabaco_motivo<br>Mostrar el archivo SÓLO si:<br>[ftabaco_personas_cant]='1' o<br>r [ftabaco_personas_cant]='2' | 32.- Por lo que ha visto u oído hasta este minuto en este programa ¿Cuál cree que es él o los motivos principales por el que personaje usa o justifica el uso de tabaco? (Seleccione máximo dos alternativas)<br><i>Seleccione máximo dos alternativas</i> | checkbox<br><table border="1"> <tr> <td>1</td> <td>ftabaco_motivo__1</td> <td>como cuestionamiento o rebeldía frente a las instituciones sociales</td> </tr> <tr> <td>2</td> <td>ftabaco_motivo__2</td> <td>como mecanismo para socializar o intercambiar experiencias entre pares</td> </tr> <tr> <td>3</td> <td>ftabaco_motivo__3</td> <td>porque muchos lo hacen o lo hacían en su entorno familiar o de amistades</td> </tr> <tr> <td>4</td> <td>ftabaco_motivo__4</td> <td>para proyectar una imagen ideal, glamour, encanto, éxito, o poder o para identificarse con personas o personajes que admira</td> </tr> <tr> <td>5</td> <td>ftabaco_motivo__5</td> <td>como signo de madurez e independencia</td> </tr> <tr> <td>6</td> <td>ftabaco_motivo__6</td> <td>para obtener placer, divertirse, o para hacer frente al estrés.</td> </tr> <tr> <td>7</td> <td>ftabaco_motivo__7</td> <td>No se puede determinar</td> </tr> </table><br>alineación de encargo LV | 1 | ftabaco_motivo__1 | como cuestionamiento o rebeldía frente a las instituciones sociales | 2                  | ftabaco_motivo__2 | como mecanismo para socializar o intercambiar experiencias entre pares | 3 | ftabaco_motivo__3      | porque muchos lo hacen o lo hacían en su entorno familiar o de amistades | 4                      | ftabaco_motivo__4 | para proyectar una imagen ideal, glamour, encanto, éxito, o poder o para identificarse con personas o personajes que admira | 5 | ftabaco_motivo__5 | como signo de madurez e independencia | 6 | ftabaco_motivo__6 | para obtener placer, divertirse, o para hacer frente al estrés. | 7 | ftabaco_motivo__7 | No se puede determinar |
| 1   | ftabaco_motivo__1                                                                                               | como cuestionamiento o rebeldía frente a las instituciones sociales                                                                                                                                                                                        |                                                                                                                                                                                                                                                                                                                                                                                                                                                                                                                                                                                                                                                                                                                                                                                                                                                                                                                                                                        |   |                   |                                                                     |                    |                   |                                                                        |   |                        |                                                                          |                        |                   |                                                                                                                             |   |                   |                                       |   |                   |                                                                 |   |                   |                        |
| 2   | ftabaco_motivo__2                                                                                               | como mecanismo para socializar o intercambiar experiencias entre pares                                                                                                                                                                                     |                                                                                                                                                                                                                                                                                                                                                                                                                                                                                                                                                                                                                                                                                                                                                                                                                                                                                                                                                                        |   |                   |                                                                     |                    |                   |                                                                        |   |                        |                                                                          |                        |                   |                                                                                                                             |   |                   |                                       |   |                   |                                                                 |   |                   |                        |
| 3   | ftabaco_motivo__3                                                                                               | porque muchos lo hacen o lo hacían en su entorno familiar o de amistades                                                                                                                                                                                   |                                                                                                                                                                                                                                                                                                                                                                                                                                                                                                                                                                                                                                                                                                                                                                                                                                                                                                                                                                        |   |                   |                                                                     |                    |                   |                                                                        |   |                        |                                                                          |                        |                   |                                                                                                                             |   |                   |                                       |   |                   |                                                                 |   |                   |                        |
| 4   | ftabaco_motivo__4                                                                                               | para proyectar una imagen ideal, glamour, encanto, éxito, o poder o para identificarse con personas o personajes que admira                                                                                                                                |                                                                                                                                                                                                                                                                                                                                                                                                                                                                                                                                                                                                                                                                                                                                                                                                                                                                                                                                                                        |   |                   |                                                                     |                    |                   |                                                                        |   |                        |                                                                          |                        |                   |                                                                                                                             |   |                   |                                       |   |                   |                                                                 |   |                   |                        |
| 5   | ftabaco_motivo__5                                                                                               | como signo de madurez e independencia                                                                                                                                                                                                                      |                                                                                                                                                                                                                                                                                                                                                                                                                                                                                                                                                                                                                                                                                                                                                                                                                                                                                                                                                                        |   |                   |                                                                     |                    |                   |                                                                        |   |                        |                                                                          |                        |                   |                                                                                                                             |   |                   |                                       |   |                   |                                                                 |   |                   |                        |
| 6   | ftabaco_motivo__6                                                                                               | para obtener placer, divertirse, o para hacer frente al estrés.                                                                                                                                                                                            |                                                                                                                                                                                                                                                                                                                                                                                                                                                                                                                                                                                                                                                                                                                                                                                                                                                                                                                                                                        |   |                   |                                                                     |                    |                   |                                                                        |   |                        |                                                                          |                        |                   |                                                                                                                             |   |                   |                                       |   |                   |                                                                 |   |                   |                        |
| 7   | ftabaco_motivo__7                                                                                               | No se puede determinar                                                                                                                                                                                                                                     |                                                                                                                                                                                                                                                                                                                                                                                                                                                                                                                                                                                                                                                                                                                                                                                                                                                                                                                                                                        |   |                   |                                                                     |                    |                   |                                                                        |   |                        |                                                                          |                        |                   |                                                                                                                             |   |                   |                                       |   |                   |                                                                 |   |                   |                        |
| 172 | ftorpedo_2                                                                                                      | TORPEDO: REALIZAR LOS CAMBIOS AL PERSONAJE 2                                                                                                                                                                                                               | radio<br>alineación de encargo LV<br>Field Annotation: @HIDDEN                                                                                                                                                                                                                                                                                                                                                                                                                                                                                                                                                                                                                                                                                                                                                                                                                                                                                                         |   |                   |                                                                     |                    |                   |                                                                        |   |                        |                                                                          |                        |                   |                                                                                                                             |   |                   |                                       |   |                   |                                                                 |   |                   |                        |
| 173 | ftxt_personaje_2<br>Mostrar el archivo SÓLO si:<br>[tabaco_personas_cant]='2'                                   | Personaje 2                                                                                                                                                                                                                                                | descriptive                                                                                                                                                                                                                                                                                                                                                                                                                                                                                                                                                                                                                                                                                                                                                                                                                                                                                                                                                            |   |                   |                                                                     |                    |                   |                                                                        |   |                        |                                                                          |                        |                   |                                                                                                                             |   |                   |                                       |   |                   |                                                                 |   |                   |                        |
| 174 | fnombre_personaje_2<br>Mostrar el archivo SÓLO si:<br>[ftabaco_personas_cant]='2'                               | 33.- ¿Cómo se llama el personaje?, (debe responder esta pregunta CON mayúsculas, sin tilde y sin símbolos).                                                                                                                                                | text                                                                                                                                                                                                                                                                                                                                                                                                                                                                                                                                                                                                                                                                                                                                                                                                                                                                                                                                                                   |   |                   |                                                                     |                    |                   |                                                                        |   |                        |                                                                          |                        |                   |                                                                                                                             |   |                   |                                       |   |                   |                                                                 |   |                   |                        |
| 175 | ftabaco_tipo_p2<br>Mostrar el archivo SÓLO si:<br>[ftabaco_personas_cant]='2'                                   | 34.- ¿Qué tipo de tabaco usa la persona o personaje en pantalla durante este minuto?                                                                                                                                                                       | radio<br><table border="1"> <tr> <td>1</td> <td>Cigarrillo</td> </tr> <tr> <td>2</td> <td>Cigarro-puro</td> </tr> <tr> <td>3</td> <td>Pipa</td> </tr> <tr> <td>4</td> <td>Pipa de agua</td> </tr> <tr> <td>5</td> <td>Vaporizador</td> </tr> <tr> <td>99</td> <td>Otro producto de tabaco</td> </tr> </table>                                                                                                                                                                                                                                                                                                                                                                                                                                                                                                                                                                                                                                                          | 1 | Cigarrillo        | 2                                                                   | Cigarro-puro       | 3                 | Pipa                                                                   | 4 | Pipa de agua           | 5                                                                        | Vaporizador            | 99                | Otro producto de tabaco                                                                                                     |   |                   |                                       |   |                   |                                                                 |   |                   |                        |
| 1   | Cigarrillo                                                                                                      |                                                                                                                                                                                                                                                            |                                                                                                                                                                                                                                                                                                                                                                                                                                                                                                                                                                                                                                                                                                                                                                                                                                                                                                                                                                        |   |                   |                                                                     |                    |                   |                                                                        |   |                        |                                                                          |                        |                   |                                                                                                                             |   |                   |                                       |   |                   |                                                                 |   |                   |                        |
| 2   | Cigarro-puro                                                                                                    |                                                                                                                                                                                                                                                            |                                                                                                                                                                                                                                                                                                                                                                                                                                                                                                                                                                                                                                                                                                                                                                                                                                                                                                                                                                        |   |                   |                                                                     |                    |                   |                                                                        |   |                        |                                                                          |                        |                   |                                                                                                                             |   |                   |                                       |   |                   |                                                                 |   |                   |                        |
| 3   | Pipa                                                                                                            |                                                                                                                                                                                                                                                            |                                                                                                                                                                                                                                                                                                                                                                                                                                                                                                                                                                                                                                                                                                                                                                                                                                                                                                                                                                        |   |                   |                                                                     |                    |                   |                                                                        |   |                        |                                                                          |                        |                   |                                                                                                                             |   |                   |                                       |   |                   |                                                                 |   |                   |                        |
| 4   | Pipa de agua                                                                                                    |                                                                                                                                                                                                                                                            |                                                                                                                                                                                                                                                                                                                                                                                                                                                                                                                                                                                                                                                                                                                                                                                                                                                                                                                                                                        |   |                   |                                                                     |                    |                   |                                                                        |   |                        |                                                                          |                        |                   |                                                                                                                             |   |                   |                                       |   |                   |                                                                 |   |                   |                        |
| 5   | Vaporizador                                                                                                     |                                                                                                                                                                                                                                                            |                                                                                                                                                                                                                                                                                                                                                                                                                                                                                                                                                                                                                                                                                                                                                                                                                                                                                                                                                                        |   |                   |                                                                     |                    |                   |                                                                        |   |                        |                                                                          |                        |                   |                                                                                                                             |   |                   |                                       |   |                   |                                                                 |   |                   |                        |
| 99  | Otro producto de tabaco                                                                                         |                                                                                                                                                                                                                                                            |                                                                                                                                                                                                                                                                                                                                                                                                                                                                                                                                                                                                                                                                                                                                                                                                                                                                                                                                                                        |   |                   |                                                                     |                    |                   |                                                                        |   |                        |                                                                          |                        |                   |                                                                                                                             |   |                   |                                       |   |                   |                                                                 |   |                   |                        |
| 176 | fpapel_p2<br>Mostrar el archivo SÓLO si:<br>[ftabaco_personas_cant]='2'                                         | 35.- ¿Qué papel tiene el personaje en la trama?                                                                                                                                                                                                            | radio<br><table border="1"> <tr> <td>1</td> <td>Principal</td> </tr> <tr> <td>2</td> <td>Secundario</td> </tr> <tr> <td>3</td> <td>Terciario o extra</td> </tr> <tr> <td>4</td> <td>No se puede determinar</td> </tr> </table>                                                                                                                                                                                                                                                                                                                                                                                                                                                                                                                                                                                                                                                                                                                                         | 1 | Principal         | 2                                                                   | Secundario         | 3                 | Terciario o extra                                                      | 4 | No se puede determinar |                                                                          |                        |                   |                                                                                                                             |   |                   |                                       |   |                   |                                                                 |   |                   |                        |
| 1   | Principal                                                                                                       |                                                                                                                                                                                                                                                            |                                                                                                                                                                                                                                                                                                                                                                                                                                                                                                                                                                                                                                                                                                                                                                                                                                                                                                                                                                        |   |                   |                                                                     |                    |                   |                                                                        |   |                        |                                                                          |                        |                   |                                                                                                                             |   |                   |                                       |   |                   |                                                                 |   |                   |                        |
| 2   | Secundario                                                                                                      |                                                                                                                                                                                                                                                            |                                                                                                                                                                                                                                                                                                                                                                                                                                                                                                                                                                                                                                                                                                                                                                                                                                                                                                                                                                        |   |                   |                                                                     |                    |                   |                                                                        |   |                        |                                                                          |                        |                   |                                                                                                                             |   |                   |                                       |   |                   |                                                                 |   |                   |                        |
| 3   | Terciario o extra                                                                                               |                                                                                                                                                                                                                                                            |                                                                                                                                                                                                                                                                                                                                                                                                                                                                                                                                                                                                                                                                                                                                                                                                                                                                                                                                                                        |   |                   |                                                                     |                    |                   |                                                                        |   |                        |                                                                          |                        |                   |                                                                                                                             |   |                   |                                       |   |                   |                                                                 |   |                   |                        |
| 4   | No se puede determinar                                                                                          |                                                                                                                                                                                                                                                            |                                                                                                                                                                                                                                                                                                                                                                                                                                                                                                                                                                                                                                                                                                                                                                                                                                                                                                                                                                        |   |                   |                                                                     |                    |                   |                                                                        |   |                        |                                                                          |                        |                   |                                                                                                                             |   |                   |                                       |   |                   |                                                                 |   |                   |                        |
| 177 | fedad_p2<br>Mostrar el archivo SÓLO si:<br>[ftabaco_personas_cant]='2'                                          | 36.- ¿Qué edad parece tener el personaje?                                                                                                                                                                                                                  | radio<br><table border="1"> <tr> <td>1</td> <td>Menor de edad &gt;18</td> </tr> <tr> <td>2</td> <td>Adulto joven 18-39</td> </tr> <tr> <td>3</td> <td>Adulto maduro 40-64</td> </tr> <tr> <td>4</td> <td>Adulto mayor 65+</td> </tr> <tr> <td>5</td> <td>No se puede determinar</td> </tr> </table>                                                                                                                                                                                                                                                                                                                                                                                                                                                                                                                                                                                                                                                                    | 1 | Menor de edad >18 | 2                                                                   | Adulto joven 18-39 | 3                 | Adulto maduro 40-64                                                    | 4 | Adulto mayor 65+       | 5                                                                        | No se puede determinar |                   |                                                                                                                             |   |                   |                                       |   |                   |                                                                 |   |                   |                        |
| 1   | Menor de edad >18                                                                                               |                                                                                                                                                                                                                                                            |                                                                                                                                                                                                                                                                                                                                                                                                                                                                                                                                                                                                                                                                                                                                                                                                                                                                                                                                                                        |   |                   |                                                                     |                    |                   |                                                                        |   |                        |                                                                          |                        |                   |                                                                                                                             |   |                   |                                       |   |                   |                                                                 |   |                   |                        |
| 2   | Adulto joven 18-39                                                                                              |                                                                                                                                                                                                                                                            |                                                                                                                                                                                                                                                                                                                                                                                                                                                                                                                                                                                                                                                                                                                                                                                                                                                                                                                                                                        |   |                   |                                                                     |                    |                   |                                                                        |   |                        |                                                                          |                        |                   |                                                                                                                             |   |                   |                                       |   |                   |                                                                 |   |                   |                        |
| 3   | Adulto maduro 40-64                                                                                             |                                                                                                                                                                                                                                                            |                                                                                                                                                                                                                                                                                                                                                                                                                                                                                                                                                                                                                                                                                                                                                                                                                                                                                                                                                                        |   |                   |                                                                     |                    |                   |                                                                        |   |                        |                                                                          |                        |                   |                                                                                                                             |   |                   |                                       |   |                   |                                                                 |   |                   |                        |
| 4   | Adulto mayor 65+                                                                                                |                                                                                                                                                                                                                                                            |                                                                                                                                                                                                                                                                                                                                                                                                                                                                                                                                                                                                                                                                                                                                                                                                                                                                                                                                                                        |   |                   |                                                                     |                    |                   |                                                                        |   |                        |                                                                          |                        |                   |                                                                                                                             |   |                   |                                       |   |                   |                                                                 |   |                   |                        |
| 5   | No se puede determinar                                                                                          |                                                                                                                                                                                                                                                            |                                                                                                                                                                                                                                                                                                                                                                                                                                                                                                                                                                                                                                                                                                                                                                                                                                                                                                                                                                        |   |                   |                                                                     |                    |                   |                                                                        |   |                        |                                                                          |                        |                   |                                                                                                                             |   |                   |                                       |   |                   |                                                                 |   |                   |                        |

23/10/2020

FONIS TABACO V2.0 | REDCap

|     |                                                                                                                    |                                                                      |                                                                                                                                                                                                                                                                                                                                                                                                                                                                                                                                                                                                                                                                                                          |   |                                       |   |                                  |   |                                  |   |                                          |   |                                                        |   |                                |   |                           |   |                                                  |   |                                         |    |                        |
|-----|--------------------------------------------------------------------------------------------------------------------|----------------------------------------------------------------------|----------------------------------------------------------------------------------------------------------------------------------------------------------------------------------------------------------------------------------------------------------------------------------------------------------------------------------------------------------------------------------------------------------------------------------------------------------------------------------------------------------------------------------------------------------------------------------------------------------------------------------------------------------------------------------------------------------|---|---------------------------------------|---|----------------------------------|---|----------------------------------|---|------------------------------------------|---|--------------------------------------------------------|---|--------------------------------|---|---------------------------|---|--------------------------------------------------|---|-----------------------------------------|----|------------------------|
| 178 | fsexo_biologico_p2<br>Mostrar el archivo SÓLO si:<br>[ftabaco_personas_cant]='2'                                   | 37.- ¿Qué sexo biológico parecer tener el personaje?                 | radio<br><table border="1"> <tr><td>1</td><td>Hombre</td></tr> <tr><td>2</td><td>Mujer</td></tr> <tr><td>3</td><td>No se puede determinar</td></tr> </table>                                                                                                                                                                                                                                                                                                                                                                                                                                                                                                                                             | 1 | Hombre                                | 2 | Mujer                            | 3 | No se puede determinar           |   |                                          |   |                                                        |   |                                |   |                           |   |                                                  |   |                                         |    |                        |
| 1   | Hombre                                                                                                             |                                                                      |                                                                                                                                                                                                                                                                                                                                                                                                                                                                                                                                                                                                                                                                                                          |   |                                       |   |                                  |   |                                  |   |                                          |   |                                                        |   |                                |   |                           |   |                                                  |   |                                         |    |                        |
| 2   | Mujer                                                                                                              |                                                                      |                                                                                                                                                                                                                                                                                                                                                                                                                                                                                                                                                                                                                                                                                                          |   |                                       |   |                                  |   |                                  |   |                                          |   |                                                        |   |                                |   |                           |   |                                                  |   |                                         |    |                        |
| 3   | No se puede determinar                                                                                             |                                                                      |                                                                                                                                                                                                                                                                                                                                                                                                                                                                                                                                                                                                                                                                                                          |   |                                       |   |                                  |   |                                  |   |                                          |   |                                                        |   |                                |   |                           |   |                                                  |   |                                         |    |                        |
| 179 | fuso_contexto_fisico_p2<br>Mostrar el archivo SÓLO si:<br>[ftabaco_personas_cant]='2'                              | 38.- ¿En qué ambiente físico usa tabaco el personaje en este minuto? | radio<br><table border="1"> <tr><td>1</td><td>En ambiente cerrado</td></tr> <tr><td>2</td><td>En ambiente semiabierto</td></tr> <tr><td>3</td><td>En ambiente abierto</td></tr> <tr><td>4</td><td>No se puede determinar</td></tr> </table>                                                                                                                                                                                                                                                                                                                                                                                                                                                              | 1 | En ambiente cerrado                   | 2 | En ambiente semiabierto          | 3 | En ambiente abierto              | 4 | No se puede determinar                   |   |                                                        |   |                                |   |                           |   |                                                  |   |                                         |    |                        |
| 1   | En ambiente cerrado                                                                                                |                                                                      |                                                                                                                                                                                                                                                                                                                                                                                                                                                                                                                                                                                                                                                                                                          |   |                                       |   |                                  |   |                                  |   |                                          |   |                                                        |   |                                |   |                           |   |                                                  |   |                                         |    |                        |
| 2   | En ambiente semiabierto                                                                                            |                                                                      |                                                                                                                                                                                                                                                                                                                                                                                                                                                                                                                                                                                                                                                                                                          |   |                                       |   |                                  |   |                                  |   |                                          |   |                                                        |   |                                |   |                           |   |                                                  |   |                                         |    |                        |
| 3   | En ambiente abierto                                                                                                |                                                                      |                                                                                                                                                                                                                                                                                                                                                                                                                                                                                                                                                                                                                                                                                                          |   |                                       |   |                                  |   |                                  |   |                                          |   |                                                        |   |                                |   |                           |   |                                                  |   |                                         |    |                        |
| 4   | No se puede determinar                                                                                             |                                                                      |                                                                                                                                                                                                                                                                                                                                                                                                                                                                                                                                                                                                                                                                                                          |   |                                       |   |                                  |   |                                  |   |                                          |   |                                                        |   |                                |   |                           |   |                                                  |   |                                         |    |                        |
| 180 | ftipo_local_p2<br>Mostrar el archivo SÓLO si:<br>[fuso_contexto_fisico_p2]<>'3'<br>and [ftabaco_personas_cant]='2' | 39.- ¿En qué tipo de local usa tabaco el personaje en este minuto?   | radio<br><table border="1"> <tr><td>1</td><td>En un hogar</td></tr> <tr><td>2</td><td>En un hotel o residencia</td></tr> <tr><td>3</td><td>En un bar, restaurante o similar</td></tr> <tr><td>4</td><td>En un establecimiento educativo superior</td></tr> <tr><td>5</td><td>En un establecimiento educativo de básica o secundaria</td></tr> <tr><td>6</td><td>En un establecimiento de salud</td></tr> <tr><td>7</td><td>En un medio de transporte</td></tr> <tr><td>8</td><td>En un lugar de trabajo no incluido anteriormente</td></tr> <tr><td>9</td><td>En otro lugar no incluido anteriormente</td></tr> <tr><td>10</td><td>No se puede determinar</td></tr> </table><br>alineación de encargo LV | 1 | En un hogar                           | 2 | En un hotel o residencia         | 3 | En un bar, restaurante o similar | 4 | En un establecimiento educativo superior | 5 | En un establecimiento educativo de básica o secundaria | 6 | En un establecimiento de salud | 7 | En un medio de transporte | 8 | En un lugar de trabajo no incluido anteriormente | 9 | En otro lugar no incluido anteriormente | 10 | No se puede determinar |
| 1   | En un hogar                                                                                                        |                                                                      |                                                                                                                                                                                                                                                                                                                                                                                                                                                                                                                                                                                                                                                                                                          |   |                                       |   |                                  |   |                                  |   |                                          |   |                                                        |   |                                |   |                           |   |                                                  |   |                                         |    |                        |
| 2   | En un hotel o residencia                                                                                           |                                                                      |                                                                                                                                                                                                                                                                                                                                                                                                                                                                                                                                                                                                                                                                                                          |   |                                       |   |                                  |   |                                  |   |                                          |   |                                                        |   |                                |   |                           |   |                                                  |   |                                         |    |                        |
| 3   | En un bar, restaurante o similar                                                                                   |                                                                      |                                                                                                                                                                                                                                                                                                                                                                                                                                                                                                                                                                                                                                                                                                          |   |                                       |   |                                  |   |                                  |   |                                          |   |                                                        |   |                                |   |                           |   |                                                  |   |                                         |    |                        |
| 4   | En un establecimiento educativo superior                                                                           |                                                                      |                                                                                                                                                                                                                                                                                                                                                                                                                                                                                                                                                                                                                                                                                                          |   |                                       |   |                                  |   |                                  |   |                                          |   |                                                        |   |                                |   |                           |   |                                                  |   |                                         |    |                        |
| 5   | En un establecimiento educativo de básica o secundaria                                                             |                                                                      |                                                                                                                                                                                                                                                                                                                                                                                                                                                                                                                                                                                                                                                                                                          |   |                                       |   |                                  |   |                                  |   |                                          |   |                                                        |   |                                |   |                           |   |                                                  |   |                                         |    |                        |
| 6   | En un establecimiento de salud                                                                                     |                                                                      |                                                                                                                                                                                                                                                                                                                                                                                                                                                                                                                                                                                                                                                                                                          |   |                                       |   |                                  |   |                                  |   |                                          |   |                                                        |   |                                |   |                           |   |                                                  |   |                                         |    |                        |
| 7   | En un medio de transporte                                                                                          |                                                                      |                                                                                                                                                                                                                                                                                                                                                                                                                                                                                                                                                                                                                                                                                                          |   |                                       |   |                                  |   |                                  |   |                                          |   |                                                        |   |                                |   |                           |   |                                                  |   |                                         |    |                        |
| 8   | En un lugar de trabajo no incluido anteriormente                                                                   |                                                                      |                                                                                                                                                                                                                                                                                                                                                                                                                                                                                                                                                                                                                                                                                                          |   |                                       |   |                                  |   |                                  |   |                                          |   |                                                        |   |                                |   |                           |   |                                                  |   |                                         |    |                        |
| 9   | En otro lugar no incluido anteriormente                                                                            |                                                                      |                                                                                                                                                                                                                                                                                                                                                                                                                                                                                                                                                                                                                                                                                                          |   |                                       |   |                                  |   |                                  |   |                                          |   |                                                        |   |                                |   |                           |   |                                                  |   |                                         |    |                        |
| 10  | No se puede determinar                                                                                             |                                                                      |                                                                                                                                                                                                                                                                                                                                                                                                                                                                                                                                                                                                                                                                                                          |   |                                       |   |                                  |   |                                  |   |                                          |   |                                                        |   |                                |   |                           |   |                                                  |   |                                         |    |                        |
| 181 | ftabaco_solo_o_p2<br>Mostrar el archivo SÓLO si:<br>[ftabaco_personas_cant]='2'                                    | 40.- En este minuto ¿El personaje usa tabaco en presencia de otros?  | radio<br><table border="1"> <tr><td>1</td><td>Sí, en presencia de uno o más menores</td></tr> <tr><td>2</td><td>Sí, en presencia sólo de adultos</td></tr> <tr><td>0</td><td>No</td></tr> <tr><td>4</td><td>No se puede determinar</td></tr> </table><br>alineación de encargo LV                                                                                                                                                                                                                                                                                                                                                                                                                        | 1 | Sí, en presencia de uno o más menores | 2 | Sí, en presencia sólo de adultos | 0 | No                               | 4 | No se puede determinar                   |   |                                                        |   |                                |   |                           |   |                                                  |   |                                         |    |                        |
| 1   | Sí, en presencia de uno o más menores                                                                              |                                                                      |                                                                                                                                                                                                                                                                                                                                                                                                                                                                                                                                                                                                                                                                                                          |   |                                       |   |                                  |   |                                  |   |                                          |   |                                                        |   |                                |   |                           |   |                                                  |   |                                         |    |                        |
| 2   | Sí, en presencia sólo de adultos                                                                                   |                                                                      |                                                                                                                                                                                                                                                                                                                                                                                                                                                                                                                                                                                                                                                                                                          |   |                                       |   |                                  |   |                                  |   |                                          |   |                                                        |   |                                |   |                           |   |                                                  |   |                                         |    |                        |
| 0   | No                                                                                                                 |                                                                      |                                                                                                                                                                                                                                                                                                                                                                                                                                                                                                                                                                                                                                                                                                          |   |                                       |   |                                  |   |                                  |   |                                          |   |                                                        |   |                                |   |                           |   |                                                  |   |                                         |    |                        |
| 4   | No se puede determinar                                                                                             |                                                                      |                                                                                                                                                                                                                                                                                                                                                                                                                                                                                                                                                                                                                                                                                                          |   |                                       |   |                                  |   |                                  |   |                                          |   |                                                        |   |                                |   |                           |   |                                                  |   |                                         |    |                        |
| 182 | fno_fumadores_p2<br>Mostrar el archivo SÓLO si:<br>[ftabaco_personas_cant]='2'                                     | 41.- ¿Hay al menos un acompañante que no fuma?                       | yesno<br><table border="1"> <tr><td>1</td><td>Sí</td></tr> <tr><td>0</td><td>No</td></tr> </table>                                                                                                                                                                                                                                                                                                                                                                                                                                                                                                                                                                                                       | 1 | Sí                                    | 0 | No                               |   |                                  |   |                                          |   |                                                        |   |                                |   |                           |   |                                                  |   |                                         |    |                        |
| 1   | Sí                                                                                                                 |                                                                      |                                                                                                                                                                                                                                                                                                                                                                                                                                                                                                                                                                                                                                                                                                          |   |                                       |   |                                  |   |                                  |   |                                          |   |                                                        |   |                                |   |                           |   |                                                  |   |                                         |    |                        |
| 0   | No                                                                                                                 |                                                                      |                                                                                                                                                                                                                                                                                                                                                                                                                                                                                                                                                                                                                                                                                                          |   |                                       |   |                                  |   |                                  |   |                                          |   |                                                        |   |                                |   |                           |   |                                                  |   |                                         |    |                        |

23/10/2020

FONIS TABACO V2.0 | REDCap

|     |                                                                                                                                                                                                                                                                                                                                                                                                                                                                                                                                                                                                                                                                                                                                                                                                                                                                                                                                                                                                                                                                                                                                                                         |                                                                                                                                                                 |                                                                                                                                                                                                                                                                                                                                                                                                                                                                                                                                                                                                                                                                                                                                                                                                                                                                                                                                                       |   |                               |                                                                     |                                    |                     |                                                                        |   |                     |                                                                          |   |                     |                                                                                                                             |   |                     |                                       |   |                     |                                                                 |   |                     |                        |
|-----|-------------------------------------------------------------------------------------------------------------------------------------------------------------------------------------------------------------------------------------------------------------------------------------------------------------------------------------------------------------------------------------------------------------------------------------------------------------------------------------------------------------------------------------------------------------------------------------------------------------------------------------------------------------------------------------------------------------------------------------------------------------------------------------------------------------------------------------------------------------------------------------------------------------------------------------------------------------------------------------------------------------------------------------------------------------------------------------------------------------------------------------------------------------------------|-----------------------------------------------------------------------------------------------------------------------------------------------------------------|-------------------------------------------------------------------------------------------------------------------------------------------------------------------------------------------------------------------------------------------------------------------------------------------------------------------------------------------------------------------------------------------------------------------------------------------------------------------------------------------------------------------------------------------------------------------------------------------------------------------------------------------------------------------------------------------------------------------------------------------------------------------------------------------------------------------------------------------------------------------------------------------------------------------------------------------------------|---|-------------------------------|---------------------------------------------------------------------|------------------------------------|---------------------|------------------------------------------------------------------------|---|---------------------|--------------------------------------------------------------------------|---|---------------------|-----------------------------------------------------------------------------------------------------------------------------|---|---------------------|---------------------------------------|---|---------------------|-----------------------------------------------------------------|---|---------------------|------------------------|
| 183 | <div>ftabaco_motivo_2</div> <div>Mostrar el archivo SÓLO si:<br/>[ftabaco_personas_cant]='2'</div>                                                                                                                                                                                                                                                                                                                                                                                                                                                                                                                                                                                                                                                                                                                                                                                                                                                                                                                                                                                                                                                                      | 42.- Por lo que ha visto u oído hasta este minuto en este programa ¿Cuál cree que es el motivo principal por el que personaje usa o justifica el uso de tabaco? | <div>checkbox</div> <table><tr><td>1</td><td>ftabaco_motivo_2__1</td><td>como cuestionamiento o rebeldía frente a las instituciones sociales</td></tr><tr><td>2</td><td>ftabaco_motivo_2__2</td><td>como mecanismo para socializar o intercambiar experiencias entre pares</td></tr><tr><td>3</td><td>ftabaco_motivo_2__3</td><td>porque muchos lo hacen o lo hacían en su entorno familiar o de amistades</td></tr><tr><td>4</td><td>ftabaco_motivo_2__4</td><td>para proyectar una imagen ideal, glamour, encanto, éxito, o poder o para identificarse con personas o personajes que admira</td></tr><tr><td>5</td><td>ftabaco_motivo_2__5</td><td>como signo de madurez e independencia</td></tr><tr><td>6</td><td>ftabaco_motivo_2__6</td><td>para obtener placer, divertirse, o para hacer frente al estrés.</td></tr><tr><td>7</td><td>ftabaco_motivo_2__7</td><td>No se puede determinar</td></tr></table> <div>alineación de encargo LV</div> | 1 | ftabaco_motivo_2__1           | como cuestionamiento o rebeldía frente a las instituciones sociales | 2                                  | ftabaco_motivo_2__2 | como mecanismo para socializar o intercambiar experiencias entre pares | 3 | ftabaco_motivo_2__3 | porque muchos lo hacen o lo hacían en su entorno familiar o de amistades | 4 | ftabaco_motivo_2__4 | para proyectar una imagen ideal, glamour, encanto, éxito, o poder o para identificarse con personas o personajes que admira | 5 | ftabaco_motivo_2__5 | como signo de madurez e independencia | 6 | ftabaco_motivo_2__6 | para obtener placer, divertirse, o para hacer frente al estrés. | 7 | ftabaco_motivo_2__7 | No se puede determinar |
| 1   | ftabaco_motivo_2__1                                                                                                                                                                                                                                                                                                                                                                                                                                                                                                                                                                                                                                                                                                                                                                                                                                                                                                                                                                                                                                                                                                                                                     | como cuestionamiento o rebeldía frente a las instituciones sociales                                                                                             |                                                                                                                                                                                                                                                                                                                                                                                                                                                                                                                                                                                                                                                                                                                                                                                                                                                                                                                                                       |   |                               |                                                                     |                                    |                     |                                                                        |   |                     |                                                                          |   |                     |                                                                                                                             |   |                     |                                       |   |                     |                                                                 |   |                     |                        |
| 2   | ftabaco_motivo_2__2                                                                                                                                                                                                                                                                                                                                                                                                                                                                                                                                                                                                                                                                                                                                                                                                                                                                                                                                                                                                                                                                                                                                                     | como mecanismo para socializar o intercambiar experiencias entre pares                                                                                          |                                                                                                                                                                                                                                                                                                                                                                                                                                                                                                                                                                                                                                                                                                                                                                                                                                                                                                                                                       |   |                               |                                                                     |                                    |                     |                                                                        |   |                     |                                                                          |   |                     |                                                                                                                             |   |                     |                                       |   |                     |                                                                 |   |                     |                        |
| 3   | ftabaco_motivo_2__3                                                                                                                                                                                                                                                                                                                                                                                                                                                                                                                                                                                                                                                                                                                                                                                                                                                                                                                                                                                                                                                                                                                                                     | porque muchos lo hacen o lo hacían en su entorno familiar o de amistades                                                                                        |                                                                                                                                                                                                                                                                                                                                                                                                                                                                                                                                                                                                                                                                                                                                                                                                                                                                                                                                                       |   |                               |                                                                     |                                    |                     |                                                                        |   |                     |                                                                          |   |                     |                                                                                                                             |   |                     |                                       |   |                     |                                                                 |   |                     |                        |
| 4   | ftabaco_motivo_2__4                                                                                                                                                                                                                                                                                                                                                                                                                                                                                                                                                                                                                                                                                                                                                                                                                                                                                                                                                                                                                                                                                                                                                     | para proyectar una imagen ideal, glamour, encanto, éxito, o poder o para identificarse con personas o personajes que admira                                     |                                                                                                                                                                                                                                                                                                                                                                                                                                                                                                                                                                                                                                                                                                                                                                                                                                                                                                                                                       |   |                               |                                                                     |                                    |                     |                                                                        |   |                     |                                                                          |   |                     |                                                                                                                             |   |                     |                                       |   |                     |                                                                 |   |                     |                        |
| 5   | ftabaco_motivo_2__5                                                                                                                                                                                                                                                                                                                                                                                                                                                                                                                                                                                                                                                                                                                                                                                                                                                                                                                                                                                                                                                                                                                                                     | como signo de madurez e independencia                                                                                                                           |                                                                                                                                                                                                                                                                                                                                                                                                                                                                                                                                                                                                                                                                                                                                                                                                                                                                                                                                                       |   |                               |                                                                     |                                    |                     |                                                                        |   |                     |                                                                          |   |                     |                                                                                                                             |   |                     |                                       |   |                     |                                                                 |   |                     |                        |
| 6   | ftabaco_motivo_2__6                                                                                                                                                                                                                                                                                                                                                                                                                                                                                                                                                                                                                                                                                                                                                                                                                                                                                                                                                                                                                                                                                                                                                     | para obtener placer, divertirse, o para hacer frente al estrés.                                                                                                 |                                                                                                                                                                                                                                                                                                                                                                                                                                                                                                                                                                                                                                                                                                                                                                                                                                                                                                                                                       |   |                               |                                                                     |                                    |                     |                                                                        |   |                     |                                                                          |   |                     |                                                                                                                             |   |                     |                                       |   |                     |                                                                 |   |                     |                        |
| 7   | ftabaco_motivo_2__7                                                                                                                                                                                                                                                                                                                                                                                                                                                                                                                                                                                                                                                                                                                                                                                                                                                                                                                                                                                                                                                                                                                                                     | No se puede determinar                                                                                                                                          |                                                                                                                                                                                                                                                                                                                                                                                                                                                                                                                                                                                                                                                                                                                                                                                                                                                                                                                                                       |   |                               |                                                                     |                                    |                     |                                                                        |   |                     |                                                                          |   |                     |                                                                                                                             |   |                     |                                       |   |                     |                                                                 |   |                     |                        |
| 184 | <div>ftorpedo</div>                                                                                                                                                                                                                                                                                                                                                                                                                                                                                                                                                                                                                                                                                                                                                                                                                                                                                                                                                                                                                                                                                                                                                     | TORPEDO:<br>ORDENAR NUMERACIÓN DE LAS PREGUNTAS IGUAL AL WORD, VER LA FORMA EN QUE SE GUARDE FECHA Y HORA DE ENVÍO DEL CUESTIONARIO                             | <div>descriptive</div> <div>Field Annotation: @HIDDEN</div>                                                                                                                                                                                                                                                                                                                                                                                                                                                                                                                                                                                                                                                                                                                                                                                                                                                                                           |   |                               |                                                                     |                                    |                     |                                                                        |   |                     |                                                                          |   |                     |                                                                                                                             |   |                     |                                       |   |                     |                                                                 |   |                     |                        |
| 185 | <div>ftabaco_escena_explicito</div> <div>Mostrar el archivo SÓLO si:<br/>([fminuto]&lt;&gt;'0' and [frespuest<br/>as_iguales]='0' and ([ftabaco_<br/>explicito]='0' or [ftabaco_moti<br/>vo(1)]='1' or [ftabaco_motivo<br/>(2)]='1' or [ftabaco_motivo(3)]<br/>='1' or [ftabaco_motivo(4)]='1'<br/>or [ftabaco_motivo(5)]='1' or<br/>[ftabaco_motivo(6)]='1' or [fta<br/>baco_motivo(7)]='1' or [ftabac<br/>o_motivo_2(1)]='1' or [ftabaco<br/>_motivo_2(2)]='1' or [ftabaco_<br/>motivo_2(3)]='1' or [ftabaco_<br/>motivo_2(4)]='1' or [ftabaco_<br/>motivo_2(5)]='1' or [ftabaco_<br/>motivo_2(6)]='1' or [ftabaco_<br/>motivo_2(7)]='1')) or ([fminut<br/>o]='0' and ([ftabaco_explicito]<br/>='0' or [tabaco_motivo(1)]='1'<br/>or [tabaco_motivo(2)]='1' or [t<br/>abaco_motivo(3)]='1' or [taba<br/>co_motivo(4)]='1' or [tabaco_<br/>motivo(5)]='1' or [tabaco_mot<br/>ivo(6)]='1' or [tabaco_motivo<br/>(7)]='1' or [tabaco_motivo_2<br/>(1)]='1' or [tabaco_motivo_2<br/>(2)]='1' or [tabaco_motivo_2<br/>(3)]='1' or [tabaco_motivo_2<br/>(4)]='1' or [tabaco_motivo_2<br/>(5)]='1' or [tabaco_motivo_2<br/>(6)]='1' or [tabaco_motivo_2<br/>(7)]='1'))</div> | 43.- ¿Observa en este minuto el uso implícito de tabaco?                                                                                                        | <div>radio</div> <table><tr><td>1</td><td>Sí, hay audio que implica uso</td></tr><tr><td>2</td><td>Sí, hay imágenes que impliquen uso</td></tr><tr><td>3</td><td>Las dos anteriores son ciertas</td></tr><tr><td>4</td><td>No</td></tr></table>                                                                                                                                                                                                                                                                                                                                                                                                                                                                                                                                                                                                                                                                                                       | 1 | Sí, hay audio que implica uso | 2                                                                   | Sí, hay imágenes que impliquen uso | 3                   | Las dos anteriores son ciertas                                         | 4 | No                  |                                                                          |   |                     |                                                                                                                             |   |                     |                                       |   |                     |                                                                 |   |                     |                        |
| 1   | Sí, hay audio que implica uso                                                                                                                                                                                                                                                                                                                                                                                                                                                                                                                                                                                                                                                                                                                                                                                                                                                                                                                                                                                                                                                                                                                                           |                                                                                                                                                                 |                                                                                                                                                                                                                                                                                                                                                                                                                                                                                                                                                                                                                                                                                                                                                                                                                                                                                                                                                       |   |                               |                                                                     |                                    |                     |                                                                        |   |                     |                                                                          |   |                     |                                                                                                                             |   |                     |                                       |   |                     |                                                                 |   |                     |                        |
| 2   | Sí, hay imágenes que impliquen uso                                                                                                                                                                                                                                                                                                                                                                                                                                                                                                                                                                                                                                                                                                                                                                                                                                                                                                                                                                                                                                                                                                                                      |                                                                                                                                                                 |                                                                                                                                                                                                                                                                                                                                                                                                                                                                                                                                                                                                                                                                                                                                                                                                                                                                                                                                                       |   |                               |                                                                     |                                    |                     |                                                                        |   |                     |                                                                          |   |                     |                                                                                                                             |   |                     |                                       |   |                     |                                                                 |   |                     |                        |
| 3   | Las dos anteriores son ciertas                                                                                                                                                                                                                                                                                                                                                                                                                                                                                                                                                                                                                                                                                                                                                                                                                                                                                                                                                                                                                                                                                                                                          |                                                                                                                                                                 |                                                                                                                                                                                                                                                                                                                                                                                                                                                                                                                                                                                                                                                                                                                                                                                                                                                                                                                                                       |   |                               |                                                                     |                                    |                     |                                                                        |   |                     |                                                                          |   |                     |                                                                                                                             |   |                     |                                       |   |                     |                                                                 |   |                     |                        |
| 4   | No                                                                                                                                                                                                                                                                                                                                                                                                                                                                                                                                                                                                                                                                                                                                                                                                                                                                                                                                                                                                                                                                                                                                                                      |                                                                                                                                                                 |                                                                                                                                                                                                                                                                                                                                                                                                                                                                                                                                                                                                                                                                                                                                                                                                                                                                                                                                                       |   |                               |                                                                     |                                    |                     |                                                                        |   |                     |                                                                          |   |                     |                                                                                                                             |   |                     |                                       |   |                     |                                                                 |   |                     |                        |
| 186 | <div>ftabaco_escena_parafernalia</div> <div>Mostrar el archivo SÓLO si:<br/>[ftabaco_escena_explicito]&lt;&gt;'</div>                                                                                                                                                                                                                                                                                                                                                                                                                                                                                                                                                                                                                                                                                                                                                                                                                                                                                                                                                                                                                                                   | 44. ¿Aparece en este minuto parafernalia del tabaco?                                                                                                            | <div>yesno</div> <table><tr><td>1</td><td>Si</td></tr><tr><td>0</td><td>No</td></tr></table>                                                                                                                                                                                                                                                                                                                                                                                                                                                                                                                                                                                                                                                                                                                                                                                                                                                          | 1 | Si                            | 0                                                                   | No                                 |                     |                                                                        |   |                     |                                                                          |   |                     |                                                                                                                             |   |                     |                                       |   |                     |                                                                 |   |                     |                        |
| 1   | Si                                                                                                                                                                                                                                                                                                                                                                                                                                                                                                                                                                                                                                                                                                                                                                                                                                                                                                                                                                                                                                                                                                                                                                      |                                                                                                                                                                 |                                                                                                                                                                                                                                                                                                                                                                                                                                                                                                                                                                                                                                                                                                                                                                                                                                                                                                                                                       |   |                               |                                                                     |                                    |                     |                                                                        |   |                     |                                                                          |   |                     |                                                                                                                             |   |                     |                                       |   |                     |                                                                 |   |                     |                        |
| 0   | No                                                                                                                                                                                                                                                                                                                                                                                                                                                                                                                                                                                                                                                                                                                                                                                                                                                                                                                                                                                                                                                                                                                                                                      |                                                                                                                                                                 |                                                                                                                                                                                                                                                                                                                                                                                                                                                                                                                                                                                                                                                                                                                                                                                                                                                                                                                                                       |   |                               |                                                                     |                                    |                     |                                                                        |   |                     |                                                                          |   |                     |                                                                                                                             |   |                     |                                       |   |                     |                                                                 |   |                     |                        |

23/10/2020

FONIS TABACO V2.0 | REDCap

|     |                                                                                                                                                                                                                                                                 |                                                                                                                                      |                                                                          |
|-----|-----------------------------------------------------------------------------------------------------------------------------------------------------------------------------------------------------------------------------------------------------------------|--------------------------------------------------------------------------------------------------------------------------------------|--------------------------------------------------------------------------|
| 187 | fprendidos<br>Mostrar el archivo SÓLO si:<br>[ftabaco_escena_parafernalia]='1'                                                                                                                                                                                  | 45.- ¿se ve uno o varios productos de tabaco no prendidos (incluidas hoja de tabaco y colillas)?                                     | yesno<br>1 Si<br>0 No                                                    |
| 188 | fenvoltorios<br>Mostrar el archivo SÓLO si:<br>[fprendidos]<>"                                                                                                                                                                                                  | 46.- ¿Se ve uno o más envoltorios/recipientes de productos de tabaco?                                                                | yesno<br>1 Si<br>0 No                                                    |
| 189 | ffosforos<br>Mostrar el archivo SÓLO si:<br>[fenvoltorios]<>"                                                                                                                                                                                                   | 47.- ¿Se ven encendedores, fósforos, ceniceros, papel para enrollar tabaco, filtros para cigarrillos, aunque no estén siendo usados? | yesno<br>1 Si<br>0 No                                                    |
| 190 | fobjetos<br>Mostrar el archivo SÓLO si:<br>[ffosforos]<>"                                                                                                                                                                                                       | 48.- ¿Se ven otros objetos relacionados con el tabaco no mencionados anteriormente?                                                  | yesno<br>1 Si<br>0 No                                                    |
| 191 | falerta_45_a_48<br>Mostrar el archivo SÓLO si:<br>[fprendidos]='0' and [fenvoltorios]='0' and [ffosforos]='0' and [fobjetos]='0'                                                                                                                                | Debe responder afirmativamente una de las últimas cuatro preguntas (45, 46, 47 ó 48).                                                | descriptive                                                              |
| 192 | ftabaco_escena_marca<br>Mostrar el archivo SÓLO si:<br>[ftabaco_escena_parafernalia]='0' and [frespuestas_iguales]='0' or [ftabaco_escena_parafernalia]='0' and [fminuto]='0' or [fobjetos]<>" and [frespuestas_iguales]='0' or [fobjetos]<>" and [fminuto]='0' | 49.- ¿Aparece en este minuto alguna marca de tabaco?                                                                                 | yesno<br>1 Si<br>0 No                                                    |
| 193 | ftabaco_escena_otras_ref<br>Mostrar el archivo SÓLO si:<br>[ftabaco_escena_marca]<>"                                                                                                                                                                            | 50.- ¿Aparecen en este minuto otras referencias al tabaco no consideradas en las preguntas anteriores?                               | yesno<br>1 Si<br>0 No                                                    |
| 194 | fpercepcion<br>Mostrar el archivo SÓLO si:<br>[ftabaco_escena_otras_ref]='1' or [ftabaco_explicito]='1' or [ftabaco_escena_explicito]='1' or [ftabaco_escena_parafernalia]='1' or [ftabaco_escena_marca]='1'                                                    | 51.- ¿Cómo percibe usted el impacto para la salud pública de las impresiones tabáquicas que ha visto en este minuto?                 | radio<br>1 Negativo<br>2 Positivo<br>3 Mixto<br>4 No se puede determinar |
| 195 | ftorpedo_3                                                                                                                                                                                                                                                      | TORPEDO 3: LÓGICAS DE BIFURCACIÓN                                                                                                    | descriptive<br>Field Annotation: @HIDDEN                                 |
| 196 | fpauta                                                                                                                                                                                                                                                          | PAUTA                                                                                                                                | descriptive<br>Field Annotation: @HIDDEN                                 |
| 197 | fenviar<br>Mostrar el archivo SÓLO si:<br>[fprograma_sn]='0' or [frespuestas_iguales]='1'                                                                                                                                                                       | Section Header:<br><br>FIN envíe las respuestas y continúe con el siguiente minuto.                                                  | descriptive                                                              |
| 198 | ffecha_hora_registro_2                                                                                                                                                                                                                                          | Fecha y hora de registro                                                                                                             | text (datetime_dmy)<br>Field Annotation: @NOW @READONLY @HIDDEN-SURVEY   |
| 199 | ftxt_instruccion                                                                                                                                                                                                                                                | No presione el botón "ENVIAR" sino hasta haber completado la encuesta                                                                | descriptive                                                              |
| 200 | fonis_tabaco_supervisor_final_complete                                                                                                                                                                                                                          | Section Header: <i>Form Status</i><br>Complete?                                                                                      | dropdown<br>0 Incomplete<br>1 Unverified<br>2 Complete                   |

23/10/2020

FONIS TABACO V2.0 | REDCap
