# Supplementary material
Source: HighWire-hosted journal article supplement (https://tobaccocontrol.bmj.com/content/32/3/323)
Supplement: inline-supplementary-material-2 [file inline-supplementary-material-2.pdf]

**Introducción.** Se desconoce el alcance de la exposición de la población a las imágenes del tabaco en todos los géneros de programación televisiva regular y la contribución de cada uno de estos géneros, excepto en los canales abiertos del Reino Unido. El objetivo de este estudio es estimar la exposición de los jóvenes a las imágenes del tabaco en la televisión chilena en horario estelar y el tipo de programa que contribuye a dicha exposición.

**Métodos.** El contenido de los programas emitidos por los 15 canales de mayor audiencia en Chile durante tres semanas en 2019 fue analizado según el tipo de ocurrencia de tabaco categorizado como uso real, uso implícito, parafernalia de tabaco, apariciones de marcas de tabaco y si violaron la ley chilena de ambientes libres de humo para cada uno de los intervalos de un minuto analizados (92.639). La exposición de los jóvenes al contenido de tabaco se estimó utilizando cifras de audiencia de los medios.

**Resultados.** Los jóvenes recibieron 29, 11 y cuatro millones de impresiones de tabaco de cualquier tipo, uso explícito y violación de ambientes libres de humo, respectivamente, con una tasa de 21,8, 8,0 y 2,1 mil impresiones por hora de visualización de televisión. Las principales fuentes de exposición a las impresiones del tabaco fueron los largometrajes y las producciones animadas, casi en su totalidad no chilenas. Finalmente, los jóvenes estuvieron expuestos a impresiones de marcas de tabaco principalmente a través de películas, eludiendo efectivamente la prohibición de publicidad en Chile.

**Discusión.** La programación de televisión es una fuente de exposición significativa de los jóvenes a las imágenes del tabaco, incluidas las impresiones de marca. Para cumplir con el CMCT de la OMS, Chile debe prohibir mostrar marcas del tabaco en cualquier programa de televisión y exigir anuncios fuertes contra el tabaco antes de cualquier programa de televisión que muestre tabaco.
